# Supplementary material
Source: Research Square preprint supplement (doi:10.21203/rs.3.rs-9916996/v1)
Supplement: Supplementary file 1 [file 7e5b27f80c5ace40b42c1e4f.docx]

Ultrafast photochemistry of bilirubin-albumin complex reveals the molecular origin of jaundice neonatal blue-green phototherapy

Ruihua Pu#1, Yunzhi Lin#2, Yuqing Xiong#3, Weiyi Yin#1, Zhiwei Zuo*2, Beibei Wang*3, Weimin Liu*1

**Dedication**

1. School of Physical Science and Technology, ShanghaiTech University, Shanghai 201210, China. E-mail: liuwm@ shanghaitech.edu.cn

2. State Key Laboratory of Organometallic Chemistry, Shanghai Institute of Organic Chemistry, University of Chinese Academy of Sciences, Shanghai 200032, China. E-mail: zuozhw@sioc.ac.cn

3. Center for Advanced Materials Research, Beijing Normal University at Zhuhai, Zhuhai, 519087, China. E-mail: [bbwang@bnu.edu.cn](mailto:bbwang@bnu.edu.cn)

Author Contributions

# Ruihua Pu, Yunzhi Lin, Yuqing Xiong, and Weiyi Yin contributed equally to this work.

**Table of Contents**

**Section 1. Computational Methods**

**Section 2. Conformational Chirality and Exciton Coupling of Bilirubin**

**Section 3. Excitation-Wavelength-Dependent Optical Spectroscopy of the BR-HSA Complex**

**Section 4. MD simulations and TD-DFT calculations**

**Section 5. FSRS Data Processing and Vibrational-Mode Analysis**

**Section 6. Atomic coordinates for TD-DFT calculation**

**Section 1. Calculation Methods**

**Molecular docking and molecular dynamics simulation.**

The crystal structure of Human Serum Albumin (HSA) form (PDB ID: 2VUE)1 was used for the molecular docking, which was performed with Autodock Vina v1.2.32, 3. A grid box encompassing the key residues K199, K195, R222 and R257 in the IIA site, was defined with the dimensions of 45Å×35 Å×50 Å to fully cover the binding pocket. The propionic acid of 4Z,15Z-bilirubin-Ixα, embedded in a hydrophobic cavity, is protonated, while the other propionic acid exposed to the external hydrophilic environment is defined as an anion4. The protonation of the residues of IIA pocket is based on reference5. The docking pose with the most favorable binding score was selected for subsequent molecular dynamics (MD) simulations of the system with 4Z,15Z-bilirubin-IXα in the HSA-IIA site. This binding mode accounted for the highest population (64%) among all the docking results, and corresponded to the lowest-energy configuration. And the crystal structure was used as the initial conformation for the MD simulations of the system with 4Z,15E-bilirubin-Ixα in the HSA-IB site.

The topology files for the 4Z,15Z-bilirubin-IXα and 4Z,15E-bilirubin-IXα were generated using the software sobtop_1.0 (dev3.2)6. The ligands was parameterized using the GAFF27 force field, and atomic partial charges were derived following the RESP scheme8. The missing bond, angle and dihedral parameters were completed and optimized at the with M06-2X/def2-SVP level9, 10 using Gaussian 0911. The AMBER19SB12 force field was used for the proteins, and all MD simulations were performed with GROMACS-2021.413. The complexes were solvated in a dodecahedral periodic box using TIP3P14 water molecules. The system was neutralized and ionized with Na+ and Cl– ions to reproduce the physiological salt concentration of 0.15 M.

Energy minimization was carried out using the steepest descent algorithm . The system was then equilibrated in the NPT ensemble for 200 ps at 300 K using the velocity rescale thermostat and at 1 bar using the Berendsen barostat . Production MD simulations were subsequently performed for 500 ns with the temperature controlled at 300 K by the velocity rescale thermostat and pressure maintained at 1 bar by Parrinello–Rahman barostat. Three independent replicates were carried out, yielding a total simulation time of 1.5 μs for each system. All trajectory analyses were performed using Visual MD (VMD)15 and built-in GROMACS tools. Molecular visualization was performed using PyMol16.

**Quantum chemical calculation.**

To mimic the steric constraint imposed by the protein environment, a QM cluster model17, 18 was constructed by extracting the ligand and its surrounding protein residues according to the MD result, for which the atomic positions of the outer protein residues were fixed at their atomic coordinates, whereas the inner ligand was allowed to relax fully during all geometry optimizations. For the IB site, several residues directly adjacent to BR were selected, namely R114, L115, V116, R117, Y138, I142 and R186, together with water molecules. For the IIA site, the selected residues were Y150, E153, K195, R218, R222, L238, R257, H242 and A291. All residues were truncated at the Cα atom, and the dangling bonds were saturated with methyl caps (-CH3). Three snapshots were randomly selected from the MD trajectories of the IB and IIA sites for the subsequent QM cluster model calculations.

All ground-state and excited-state calculations were performed using the Gaussian 1619 program package. The cluster model was adopted, in which the peripheral protein residues were kept fixed during geometry optimization, whereas the ligand-centered inner region was fully relaxed. Ground-state geometry optimizations and calculations were carried out at the PBE0-D3BJ/def2-SVP10, 20, 21 level of theory with the SMD22 implicit solvation model. Harmonic vibrational frequency analysis was subsequently carried out at the same level of theory to verify that the stationary point has no imaginary frequencies and therefore corresponds to a genuine minimum on the potential energy surface. To study deuterium isotope effects on the Raman spectra, the exchangeable polar hydrogens (those attached to N and O atoms) of the ligand and the neighboring residues were replaced by deuterium. The deuterated models were re-optimized and subjected to frequency calculations at the identical level of theory.

Based on these optimized ground-state geometries, vertical excitation calculations were then performed with TD-DFT at CAM-B3LYP-D3BJ/def2-SVP/SMD10, 21, 22, 23 (water as solvent) level of theory. The calculation of lumirubin (LR) was carried out at the same level of theory. The resulting excited-state wavefunctions were subsequently subjected to further analysis. Wavefunction analyses were carried out with the Multiwfn program24. In particular, the excited-state electron-transfer analysis module was employed to evaluate the extent of charge transfer in the excited states, together with other density-based descriptors. Charge-difference-density (CDD) isosurfaces, as well as the corresponding hole and electron density isosurfaces generated upon photoexcitation, were visualized using the VMD program15.

The atomic coordinates of the geometry-optimized QM cluster models for the IB and IIA sites (three snapshots each) and of the geometry-optimized lumirubin molecule are listed in Supplementary Table 6-12.

**Section 2. Conformational Chirality and Exciton Coupling of Bilirubin**

**
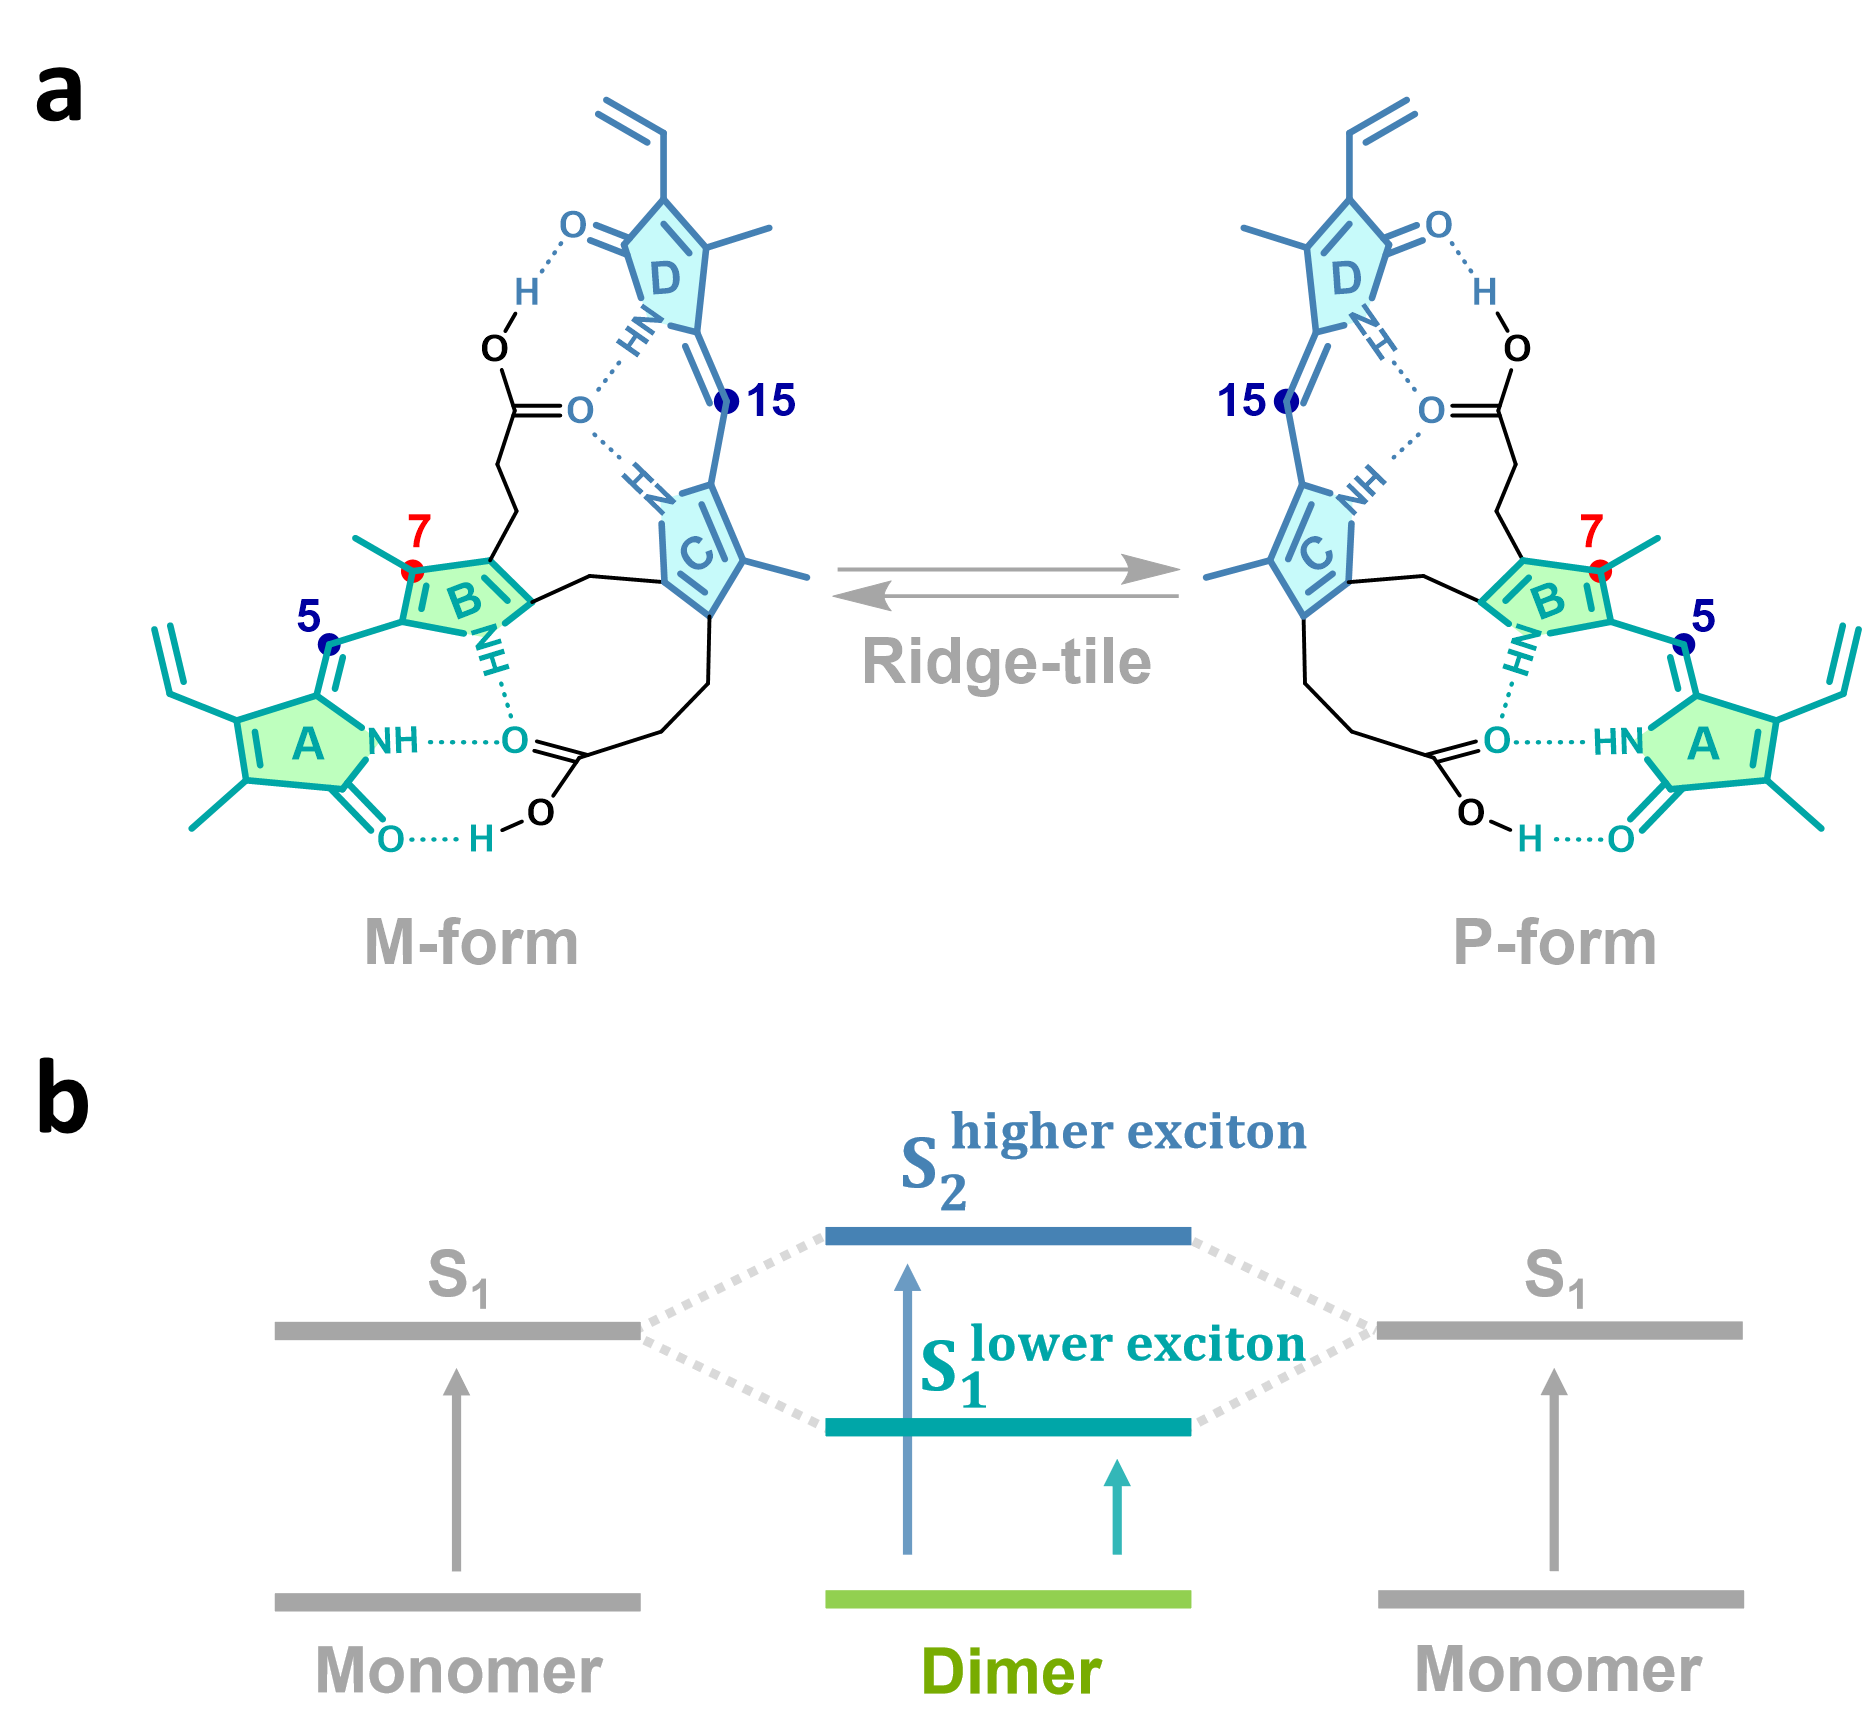
**

**Supplementary Fig. 1| Chiral conformations and exciton-coupled energy levels of free bilirubin (BR). (a)** Schematic representation of the two conformational enantiomers of free bilirubin, the M-form and P-form, which can interconvert rapidly in solution. Upon binding to human serum albumin (HSA) at a 1:1 stoichiometry, bilirubin is preferentially stabilized in the P-form. **(b)** Exciton-coupling model of bilirubin. Coupling between the two dipyrrinone chromophores splits the excited-state manifold into a higher-energy exciton state, S2, and a lower-energy exciton state, S1.

**Section 3. Excitation-Wavelength-Dependent Optical Spectroscopy of the BR-HSA Complex**

**
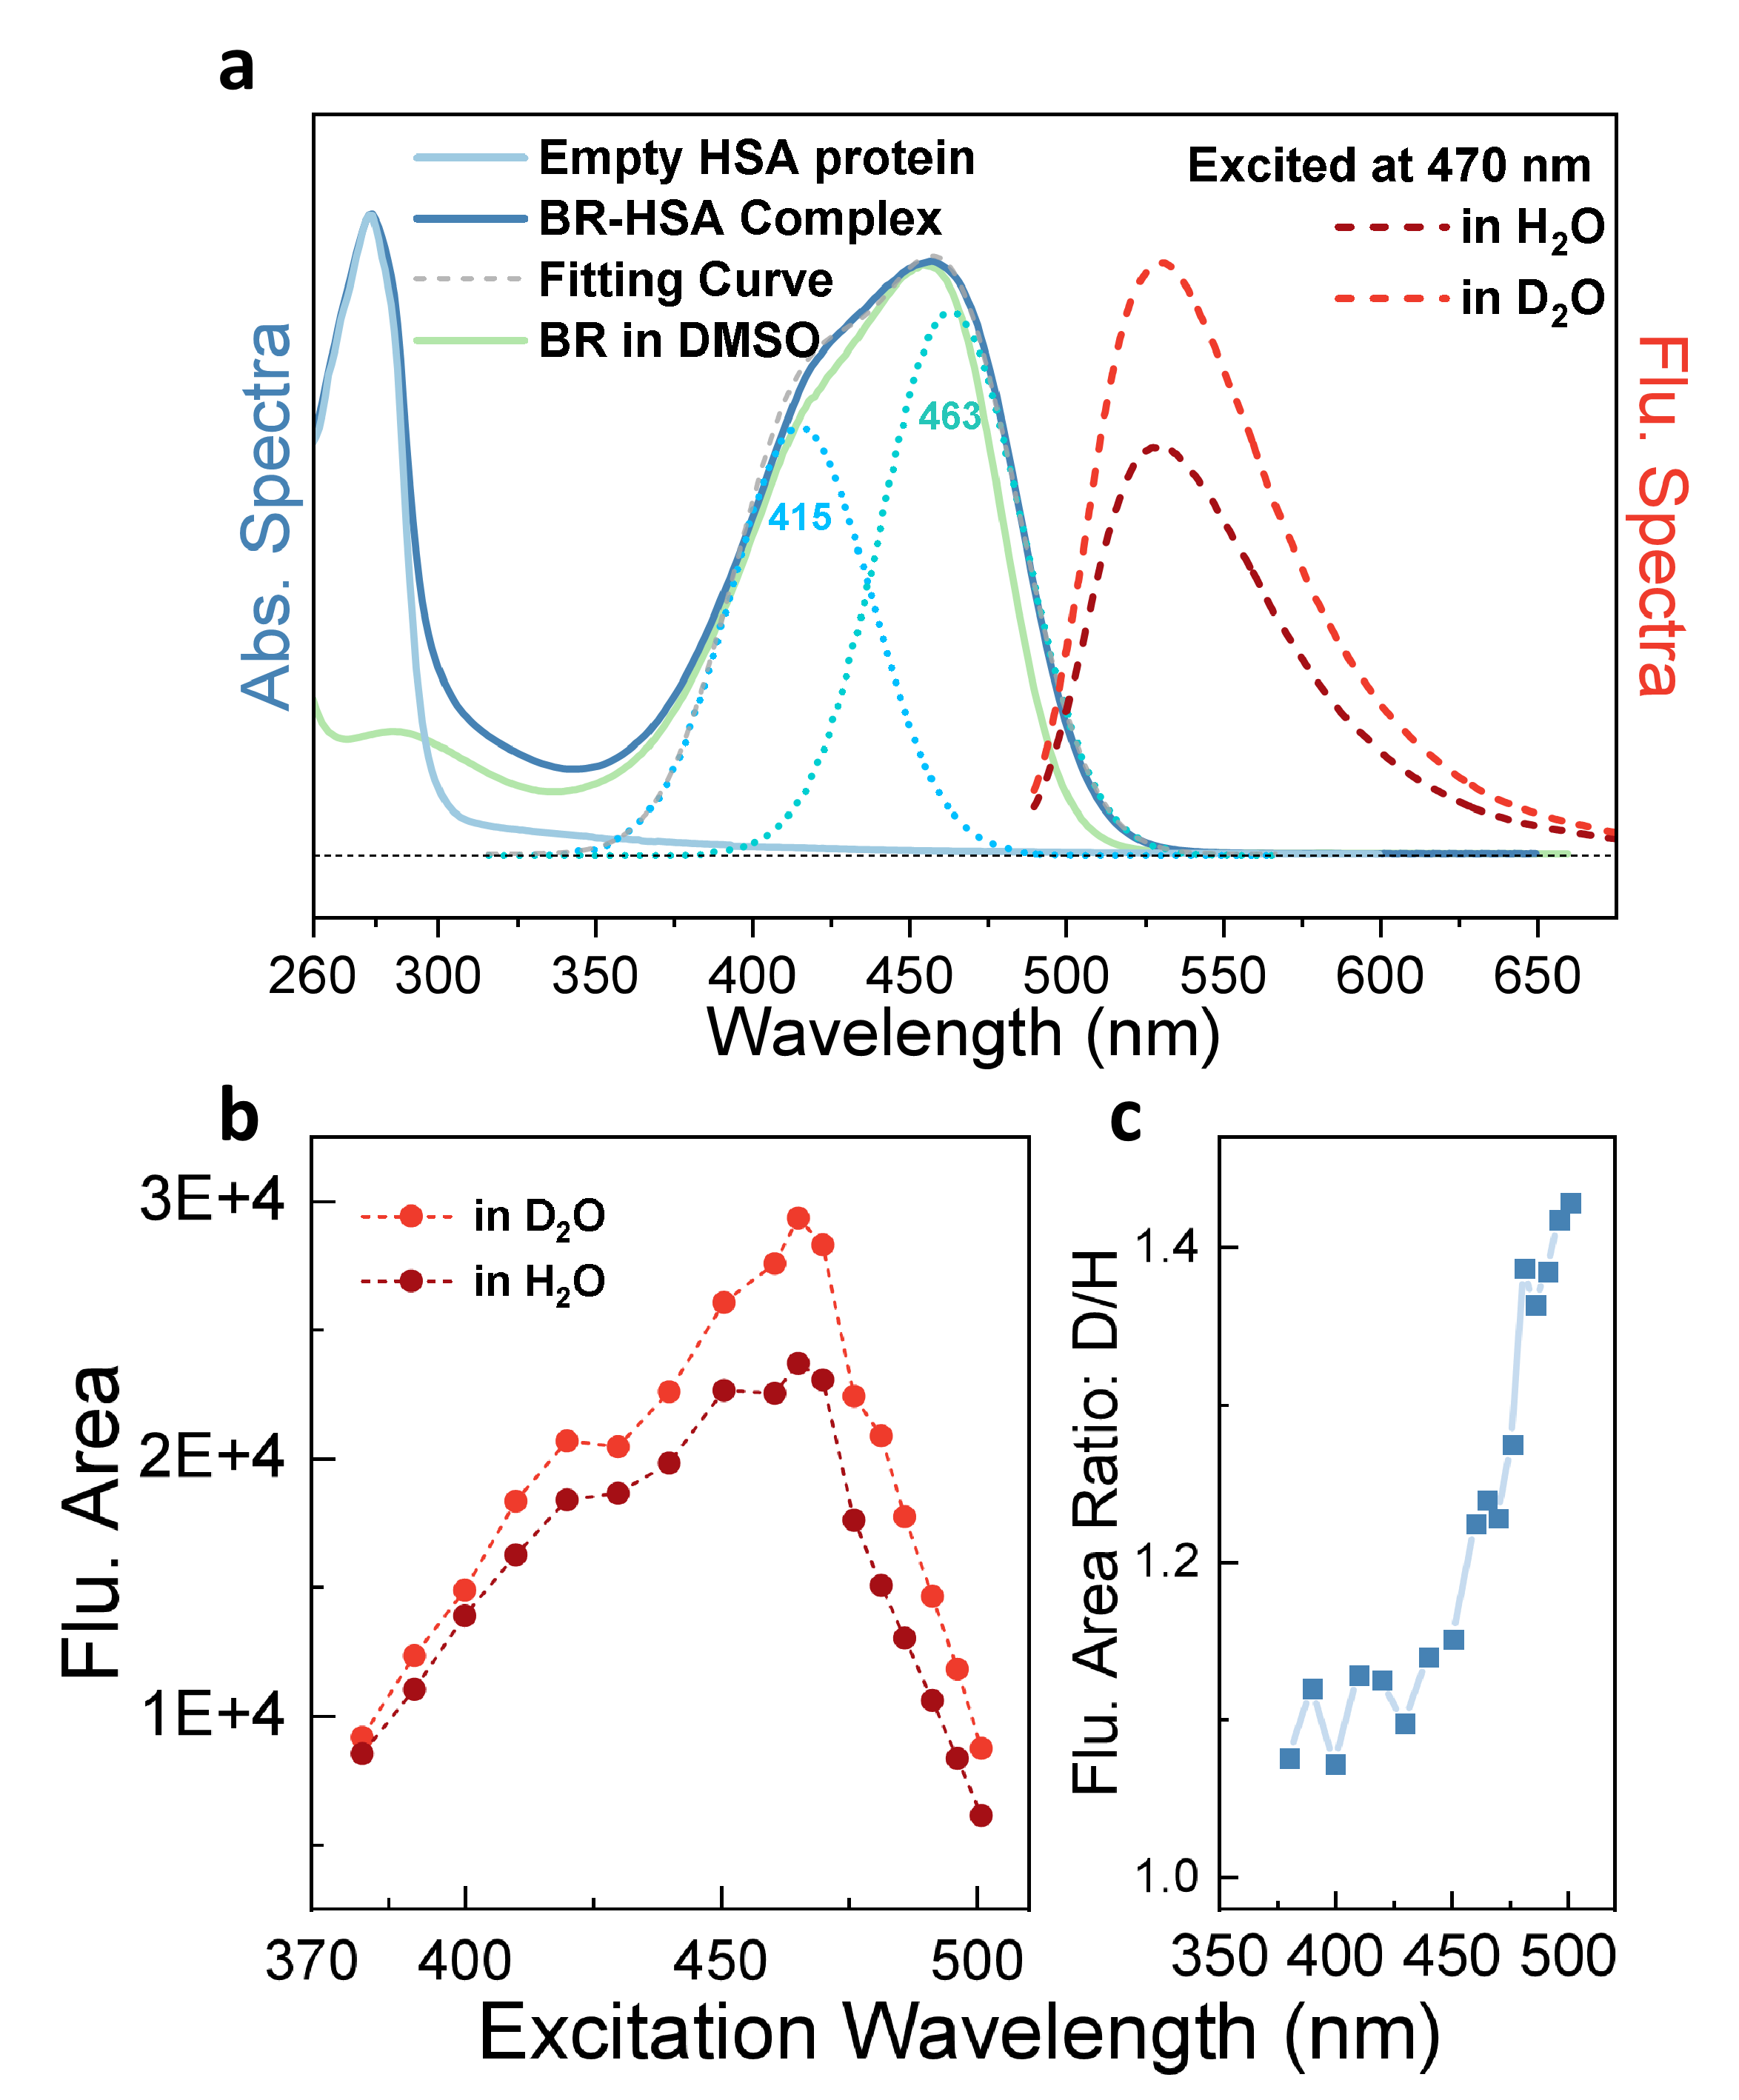
**

**Supplementary Fig. 2| Steady-state absorption and isotope-dependent fluorescence of the BR–HSA complex. (a)** Absorption spectra of HSA protein, the BR-HSA complex and free BR in DMSO. HSA protein shows a sharp absorption band near 280 nm, mainly arising from tryptophan residue. The visible absorption band of the BR–HSA complex can be decomposed into two Gaussian components centered at 415 and 463 nm, with the grey dotted lines representing their summed contribution. Free BR in DMSO exhibits a comparatively narrower visible absorption band, indicating that albumin binding broadens and splits the bilirubin absorption profile through exciton coupling and protein-induced conformational restriction. The fluorescence spectra of the BR-HSA complex excited at 470 nm show an evident isotope effect, with enhanced emission in D₂O relative to H₂O. This fluorescence enhancement is consistent with suppression of excited-state proton transfer and the associated nonradiative decay channel in D₂O. **(b)** Excitation-wavelength dependence of the integrated fluorescence intensity of the BR-HSA complex in H₂O and D₂O. Under blue-light excitation from 380 to 420 nm, deuteration produces little fluorescence enhancement. As the excitation wavelength is shifted to the red, the fluorescence enhancement in D₂O becomes progressively more pronounced. **(c)** Ratio of the integrated fluorescence intensity in D₂O to that in H₂O as a function of excitation wavelength. The increasing isotope-dependent fluorescence enhancement at longer excitation wavelengths indicates that the excited-state proton-transfer channel is preferentially activated upon excitation of the lower-energy exciton band.


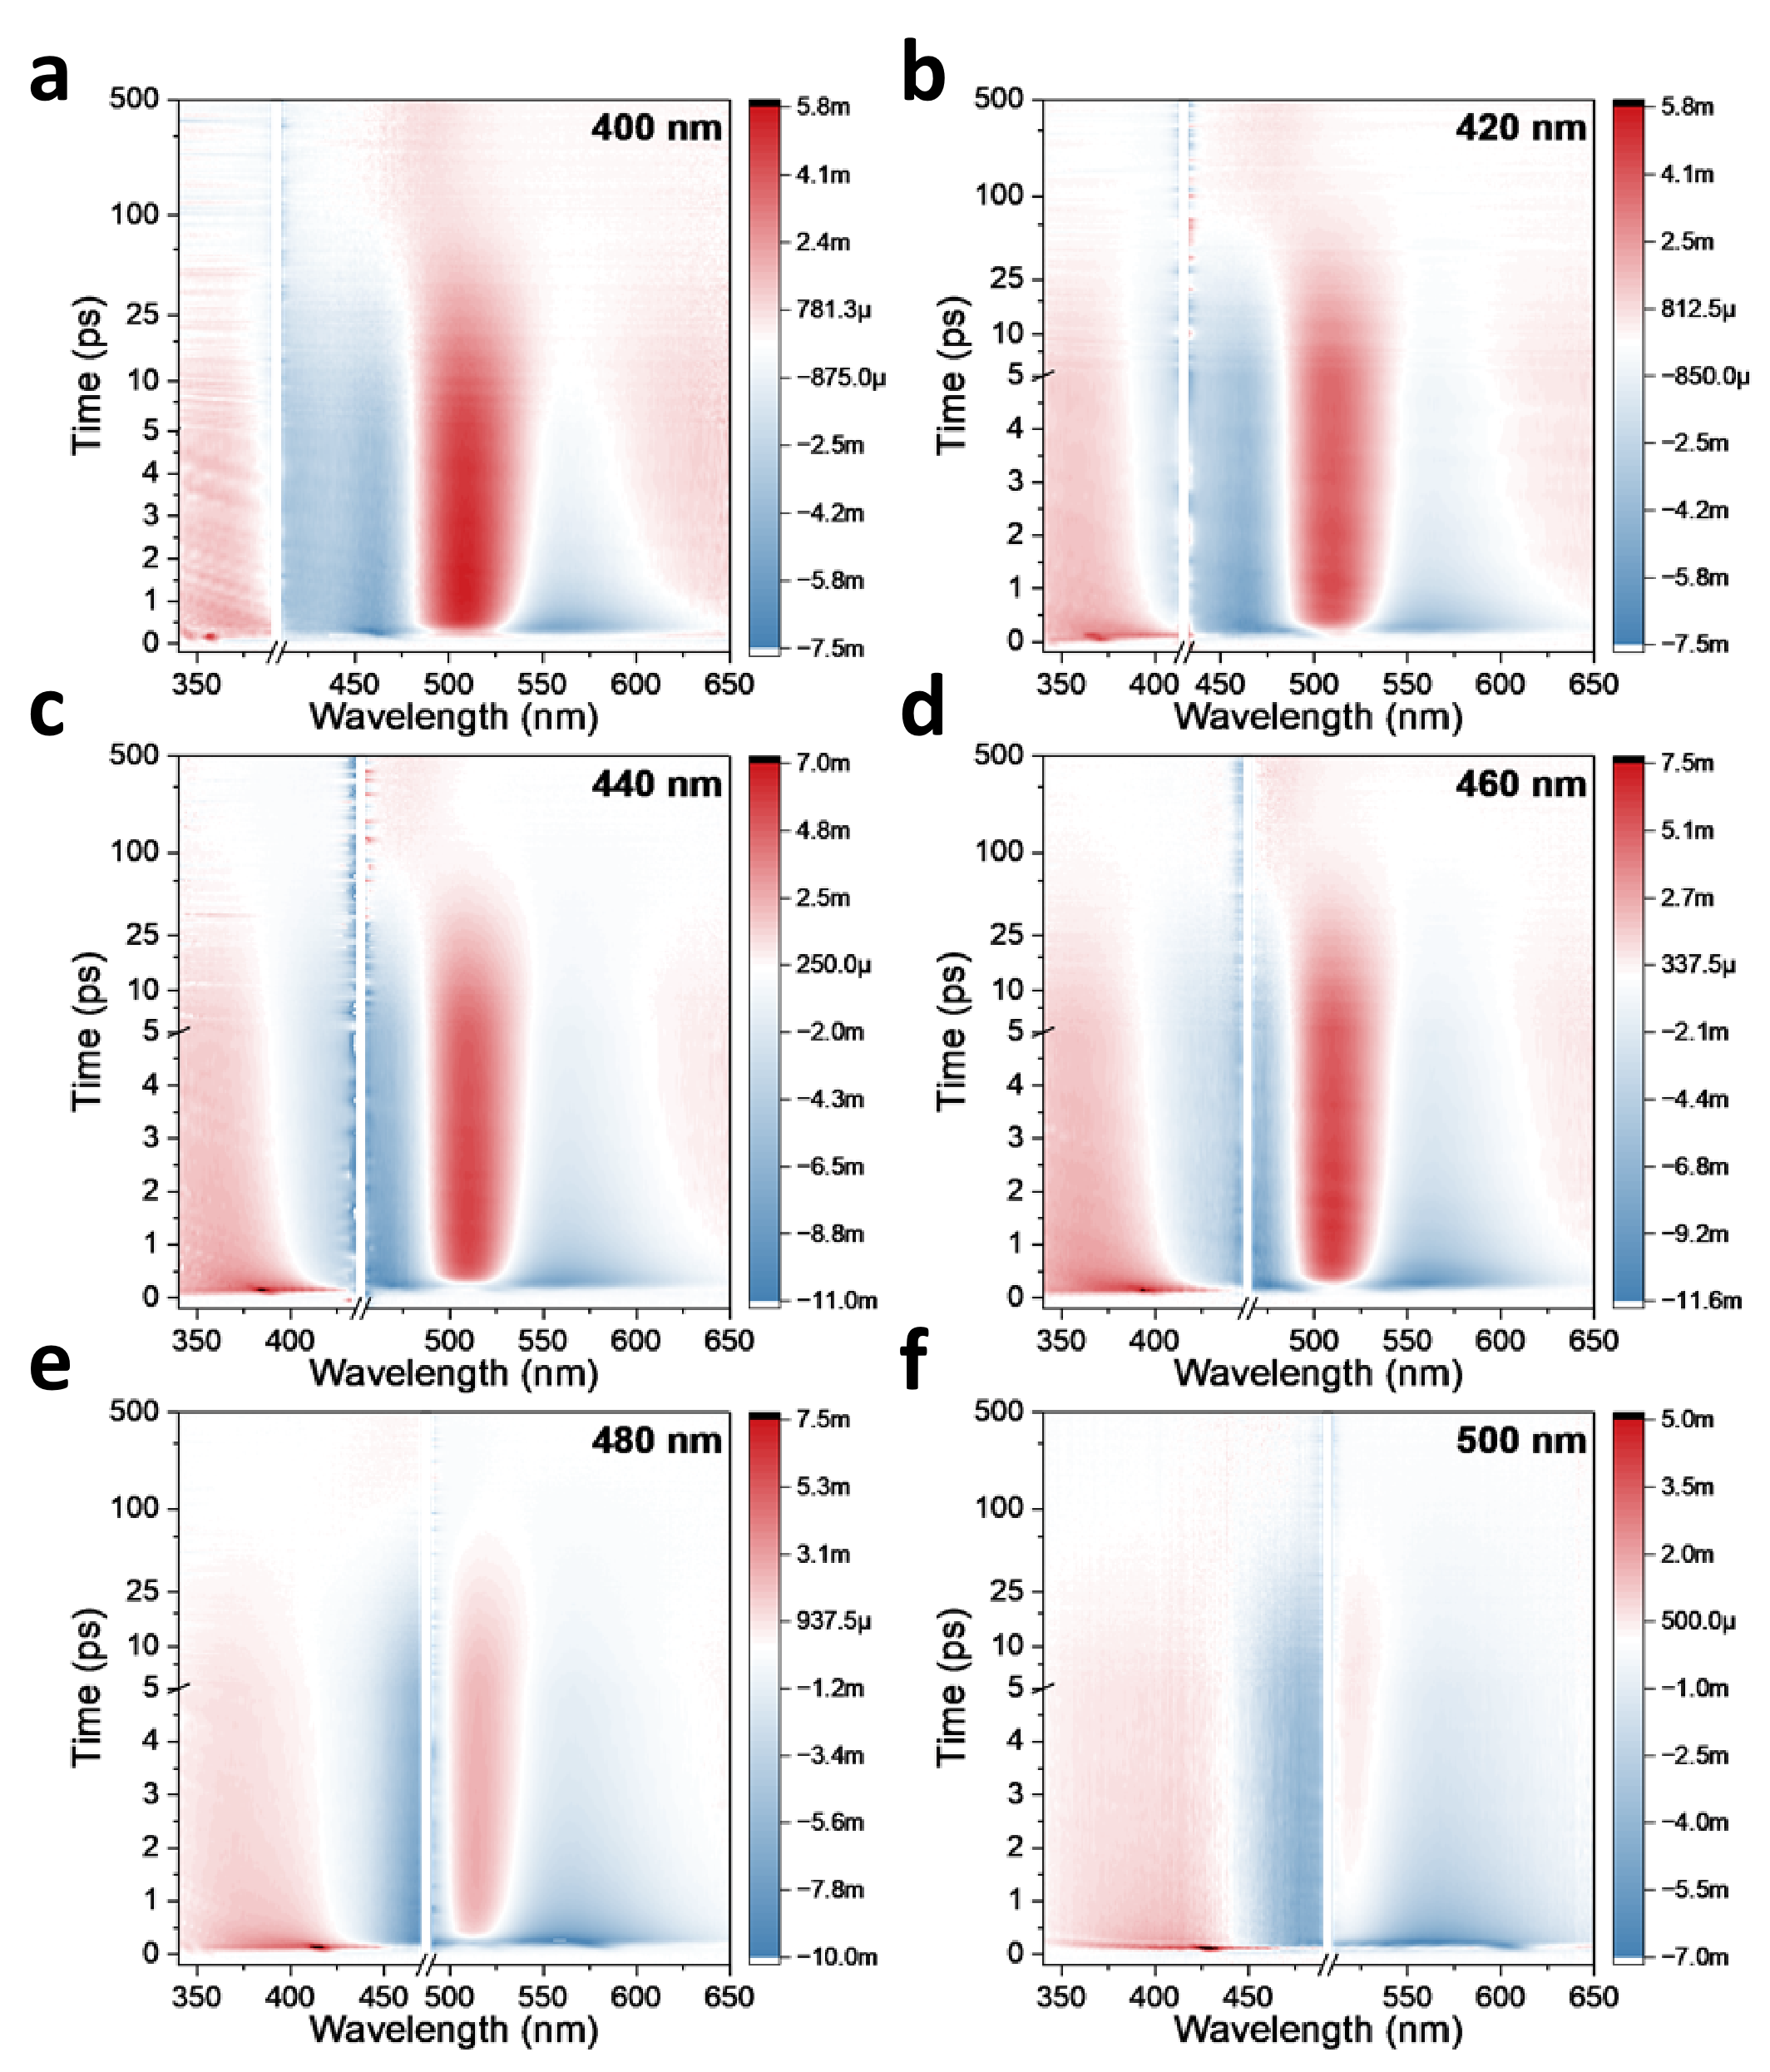


**Supplementary Fig. 3| Excitation-wavelength-dependent femtosecond transient absorption spectra of the BR-HSA complex.** Two-dimensional fs-TA maps of the BR–HSA complex recorded following excitation at **(a)** 400 nm; **(b)** 420 nm; **(c)** 440 nm; **(d)** 460 nm; **(e)** 480 nm, and **(f)** 500 nm. The spectra reveal a pronounced excitation-wavelength dependence of the transient response, reflecting the selective population of different exciton states in the BR-HSA complex.


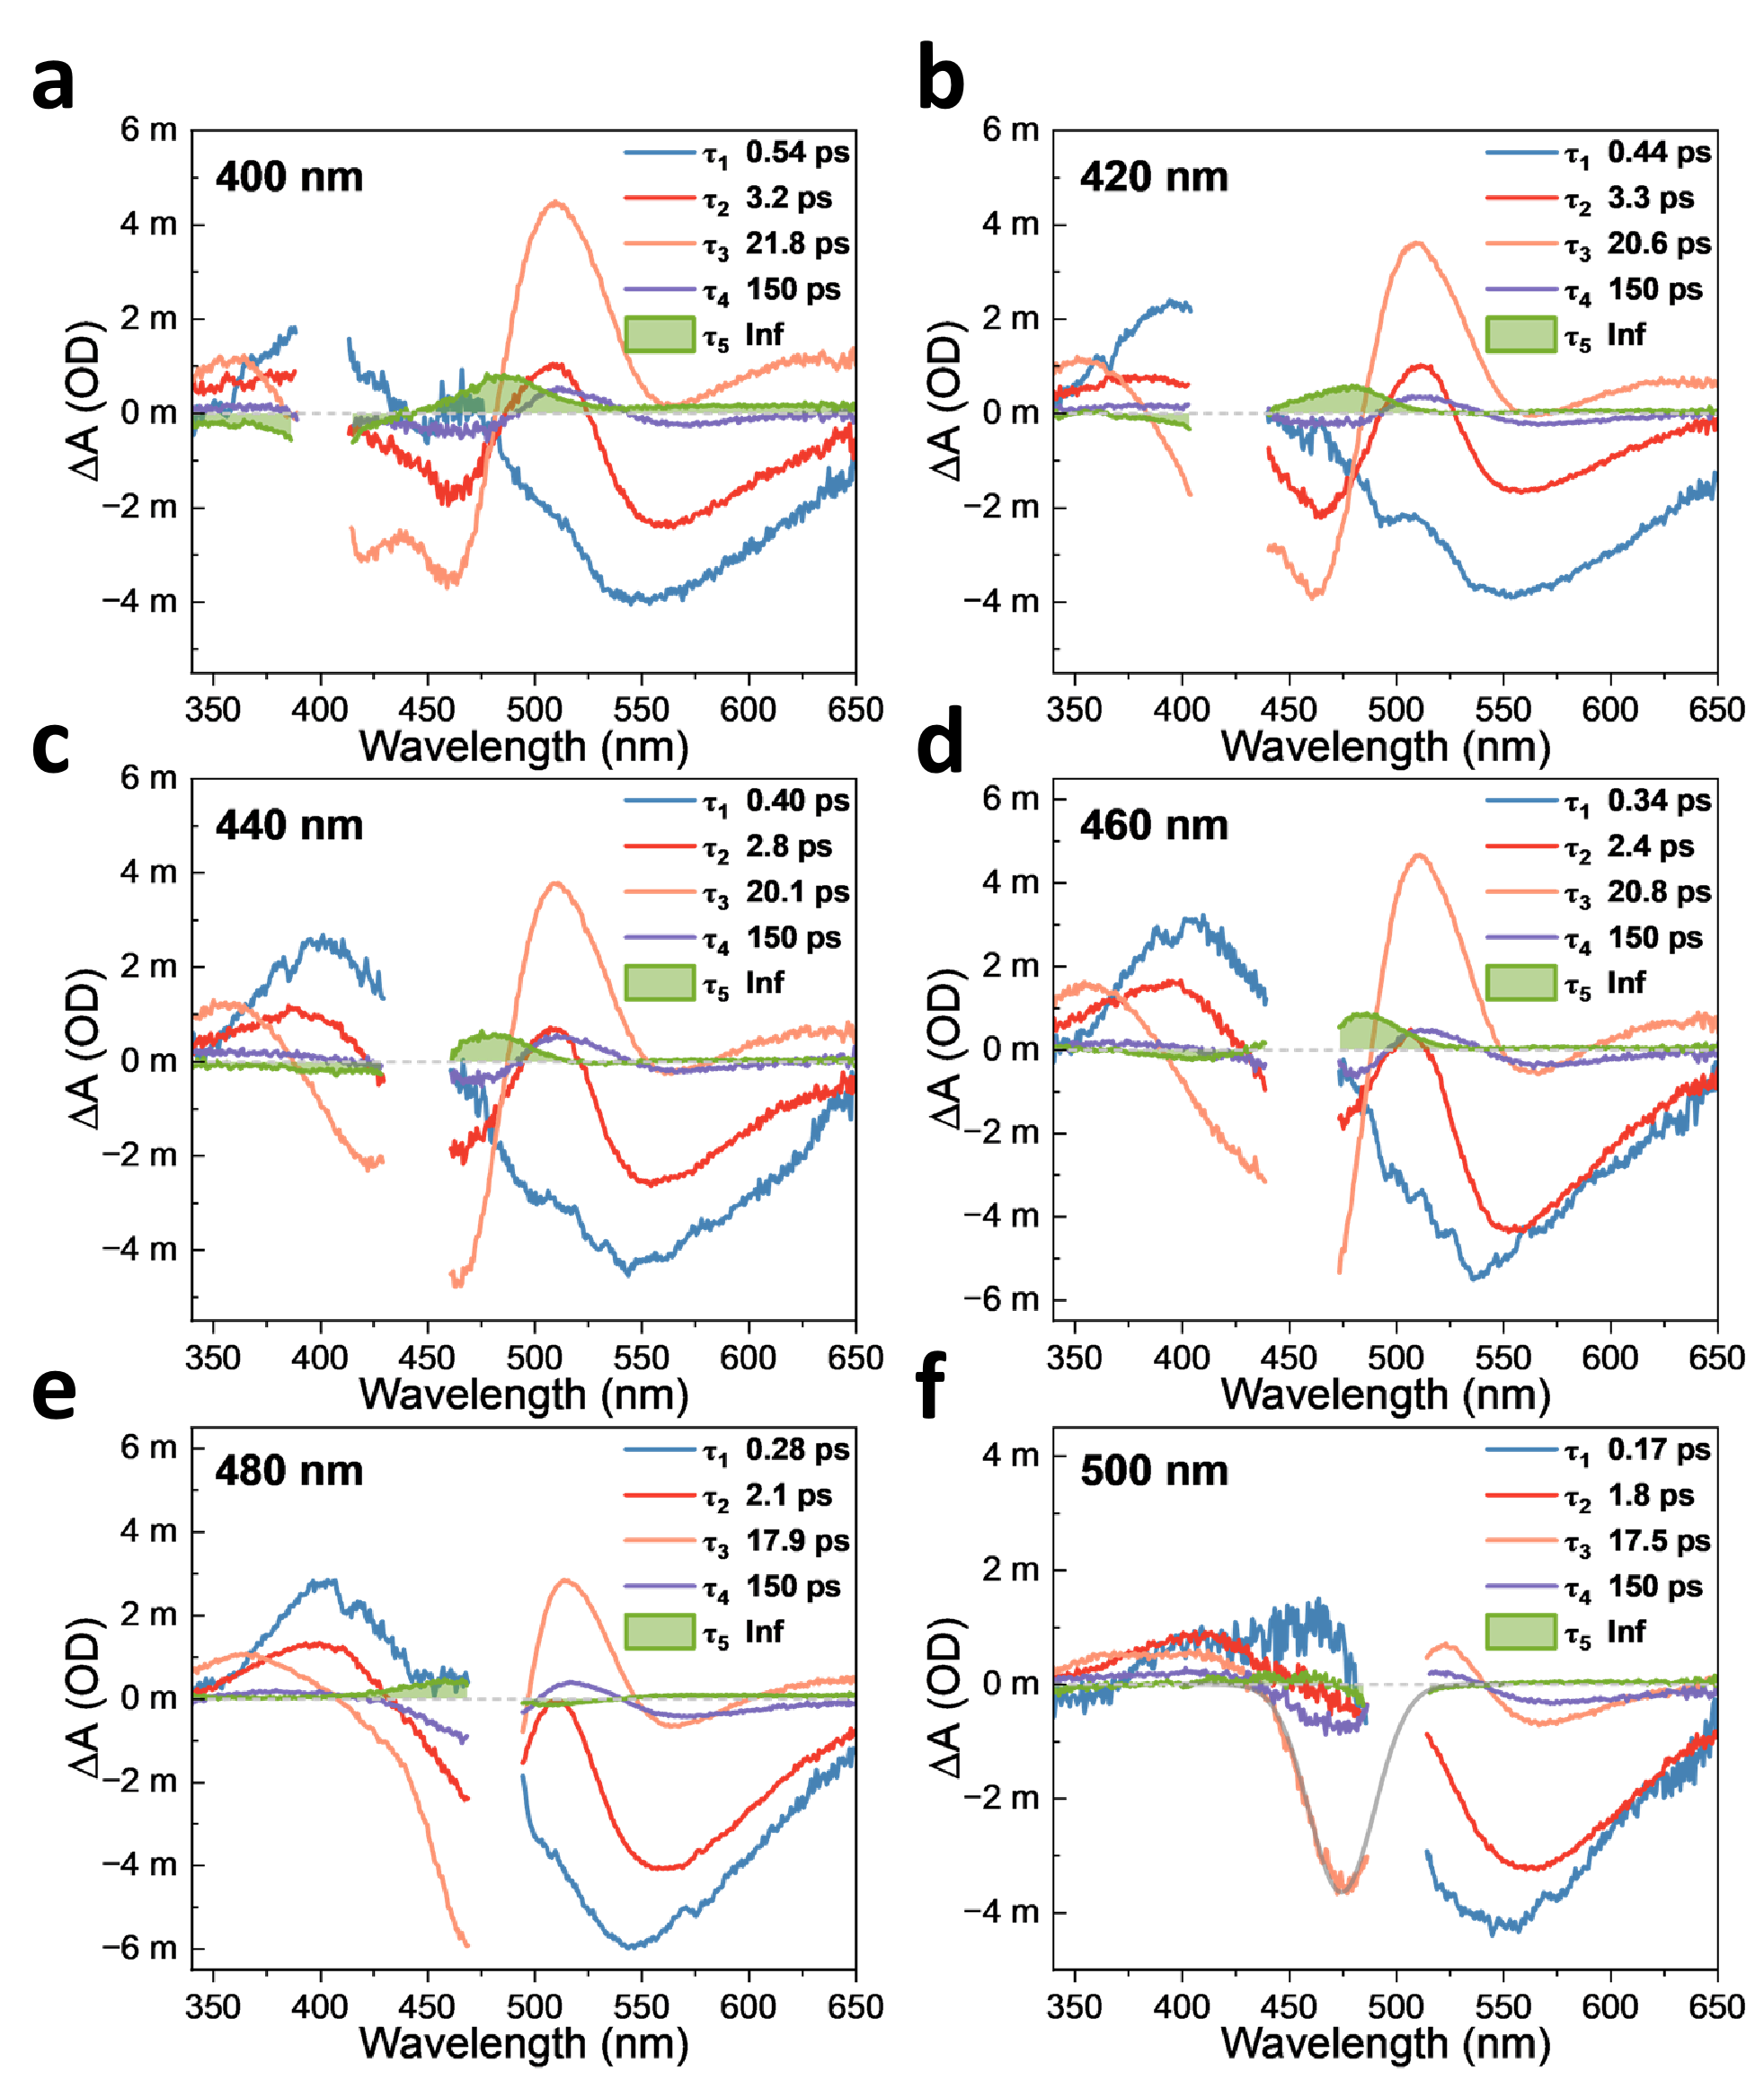


**Supplementary Fig.4| Excitation-wavelength-dependent fs-TA decay-associated difference spectra (DADS) of the BR-HSA complex.** DADS spectra of the BR–HSA complex obtained from global analysis of the fs-TA data shown in Supplementary Fig. 3 following excitation at **(a)** 400 nm; **(b)** 420 nm; **(c)** 440 nm; **(d)** 460 nm; **(e)** 480 nm, and **(f)** 500 nm.

**Table 1. Global fitting time constants of the BR-HSA complex obtained from wavelength-dependent fs-TA measurements.**

| **Pump Wavelength** | **τ1 (ps)** | **τ2 (ps)** | **τ3 (ps)** | **τ4 (ps)** | **τ5 (ps)** |
| --- | --- | --- | --- | --- | --- |
| 400 nm | 0.54 | 3.2 | 21.8 | 150 | Inf |
| 420 nm | 0.44 | 3.1 | 20.6 | 149 | Inf |
| 440 nm | 0.40 | 2.8 | 20.1 | 149 | Inf |
| 460 nm | 0.34 | 2.4 | 20.8 | 150 | Inf |
| 480 nm | 0.28 | 2.1 | 17.9 | 150 | Inf |
| 500 nm | 0.17 | 1.8 | 17.5 | 150 | Inf |


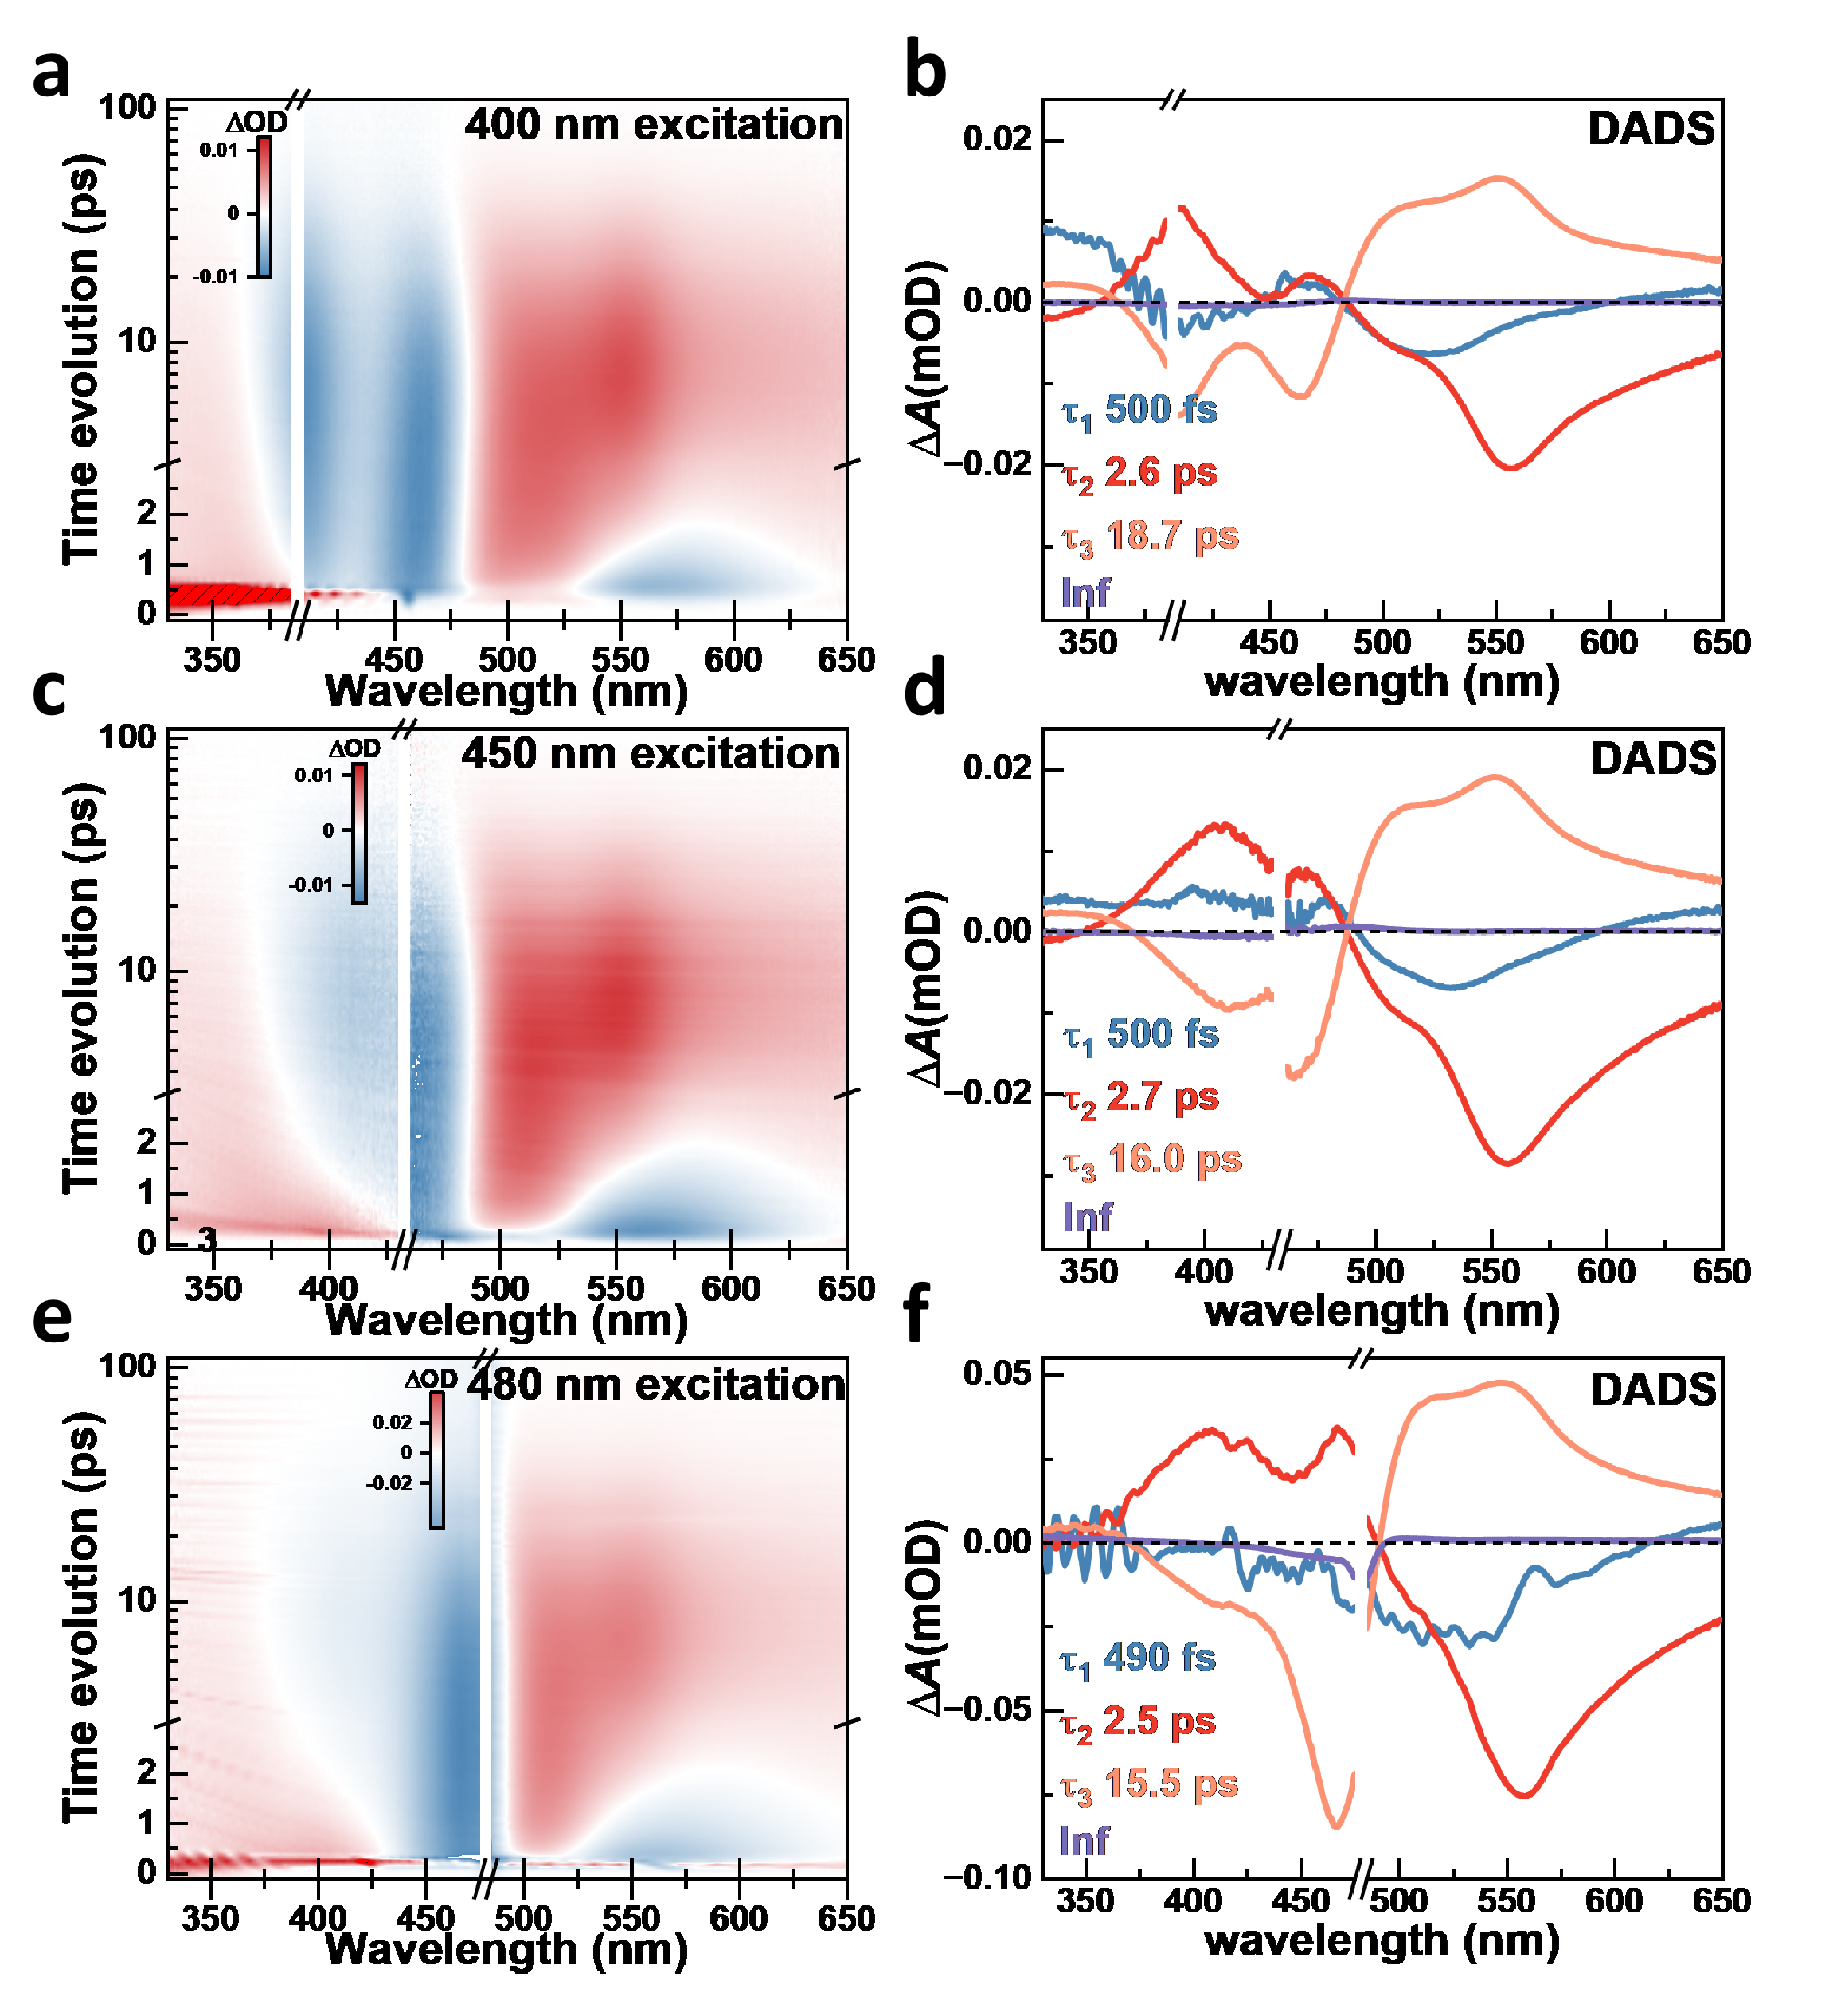


**Supplementary Fig. 5| Excitation-wavelength-dependent fs-TA spectra and DADS of free 4Z,15Z-BR in DMSO.** Two-dimensional fs-TA maps and corresponding decay-associated difference spectra (DADS) of free 4Z,15Z-BR in DMSO recorded following excitation at **(a, b)** 400 nm pump; **(c, d)** 450 nm pump; **(e, f)** 480 nm pump. Global analysis yields comparable relaxation components at different excitation wavelengths, indicating that changing the excitation wavelength primarily redistributes the initial population between the two localized exciton states rather than altering the intrinsic excited-state relaxation dynamics. Although excitation-wavelength-dependent photoproduct distributions have been reported for free bilirubin, with blue and blue–green excitation favoring different Z–E photoisomerization channels, the similar DADS profiles and lifetimes observed here suggest that the early-time Z–E isomerization and associated intramolecular H-bond reorganization proceed with broadly similar dynamics in the homogeneous DMSO environment.


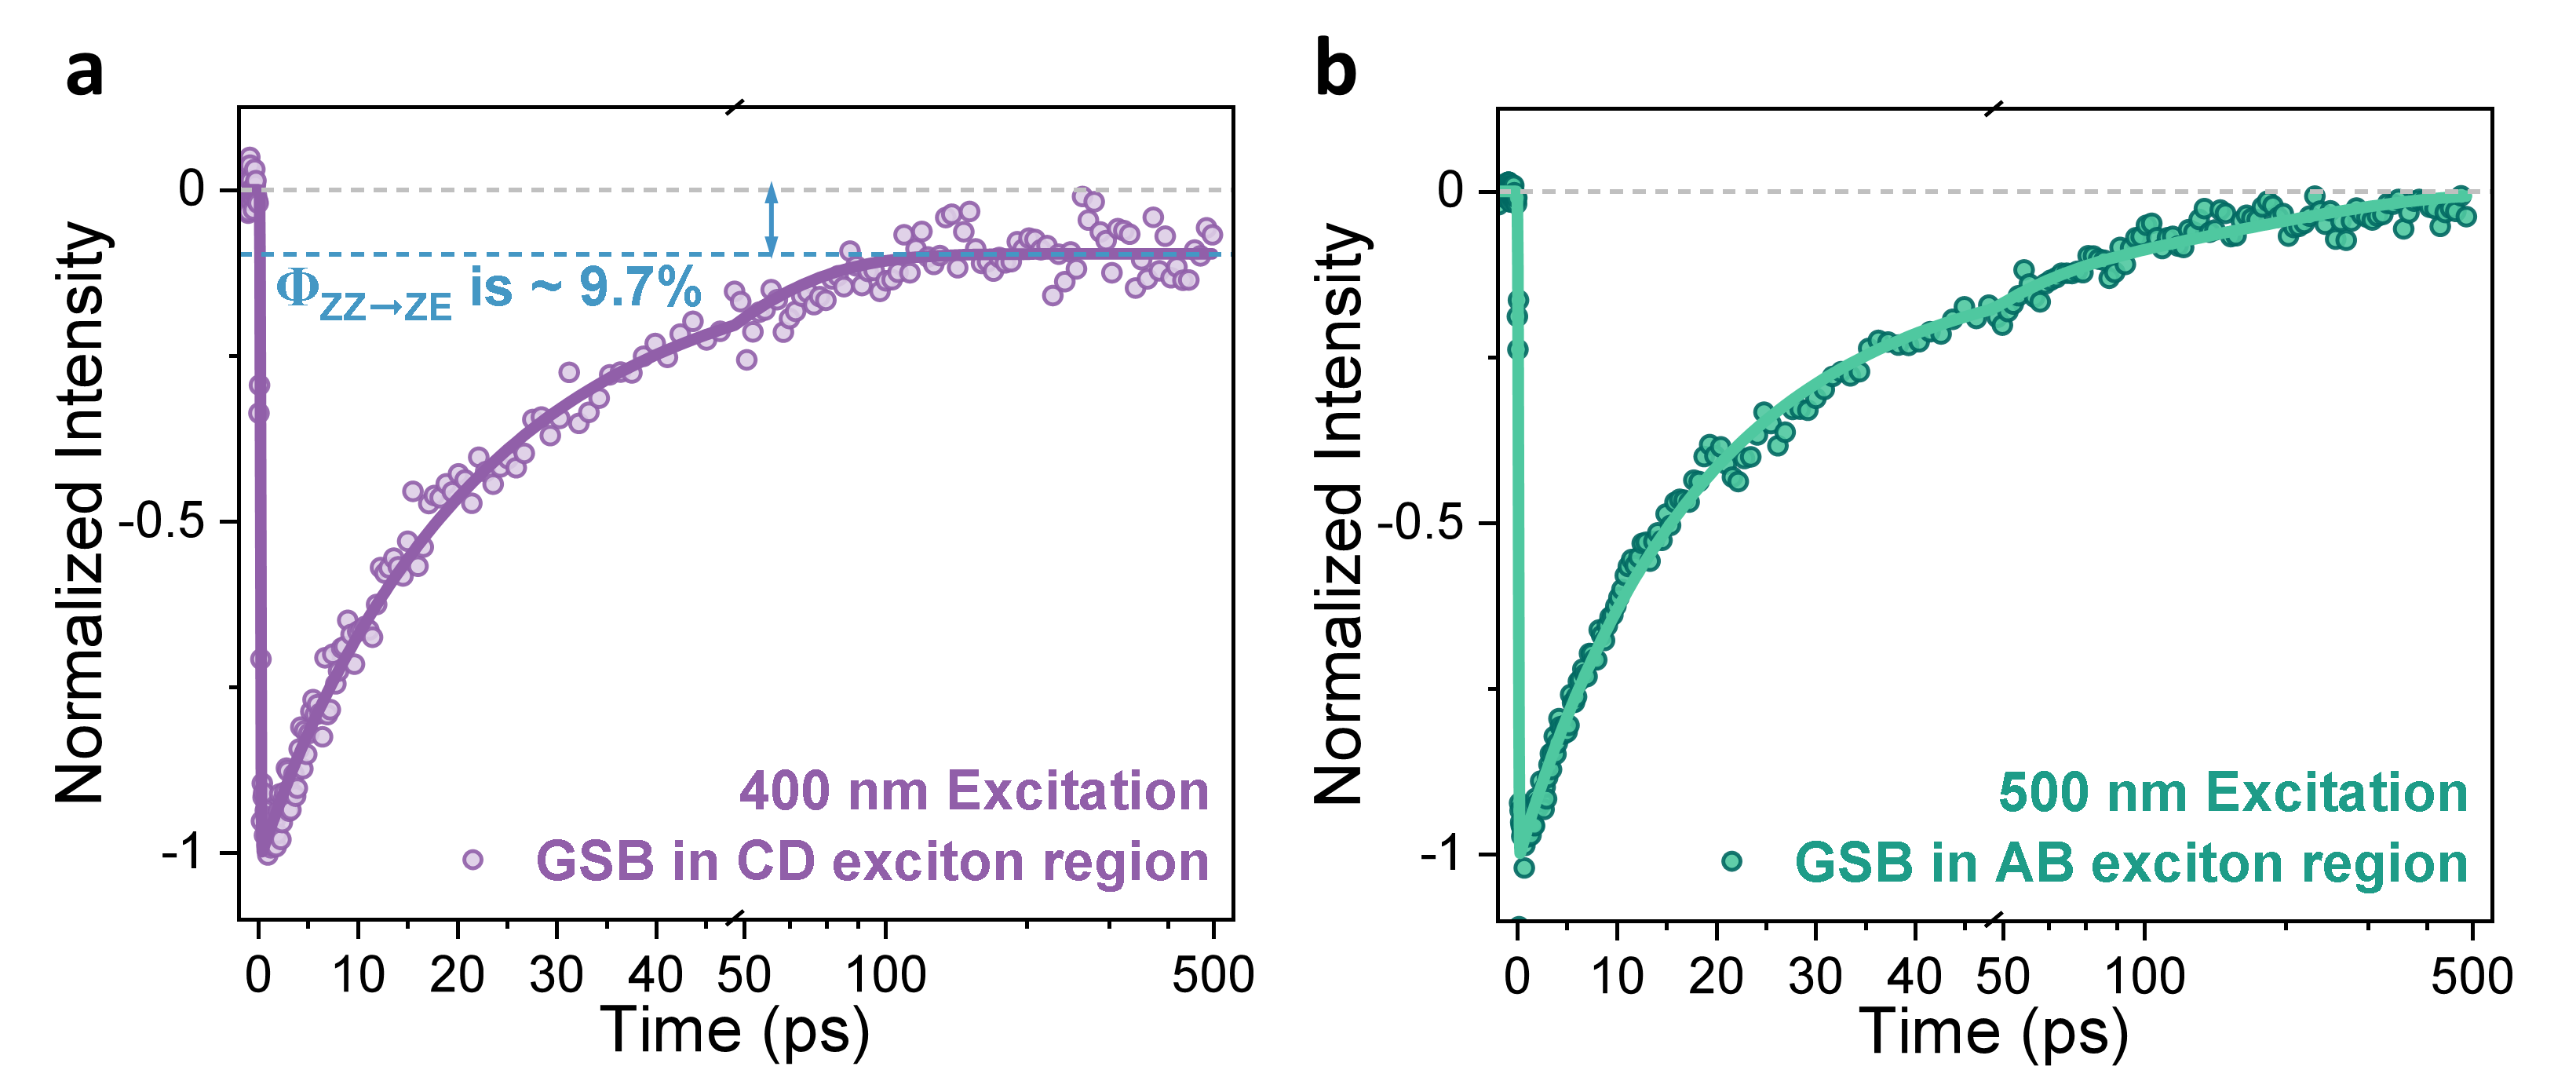


**Supplementary Fig. 6| Exciton-region-specific GSB kinetics of the BR-HSA complex under 400 and 500 nm excitation.** **(a)** Ground-state bleach recovery monitored in the high-energy exciton region (centered at 420 nm) under 400 nm excitation. The residual bleach amplitude indicates that approximately 9.7% of the initially excited BR population remains unrecovered within the experimental time window, consistent with the reported ~11% quantum yield of long-lived 4Z,15E-BR under blue irradiation. **(b)** Ground-state bleach recovery monitored in the low-energy exciton region (centered at 475 nm) under 500 nm excitation. The near-complete recovery within 500 ps indicates that excitation of the low-energy exciton does not produce an accumulated long-lived 4E,15Z-BR population.


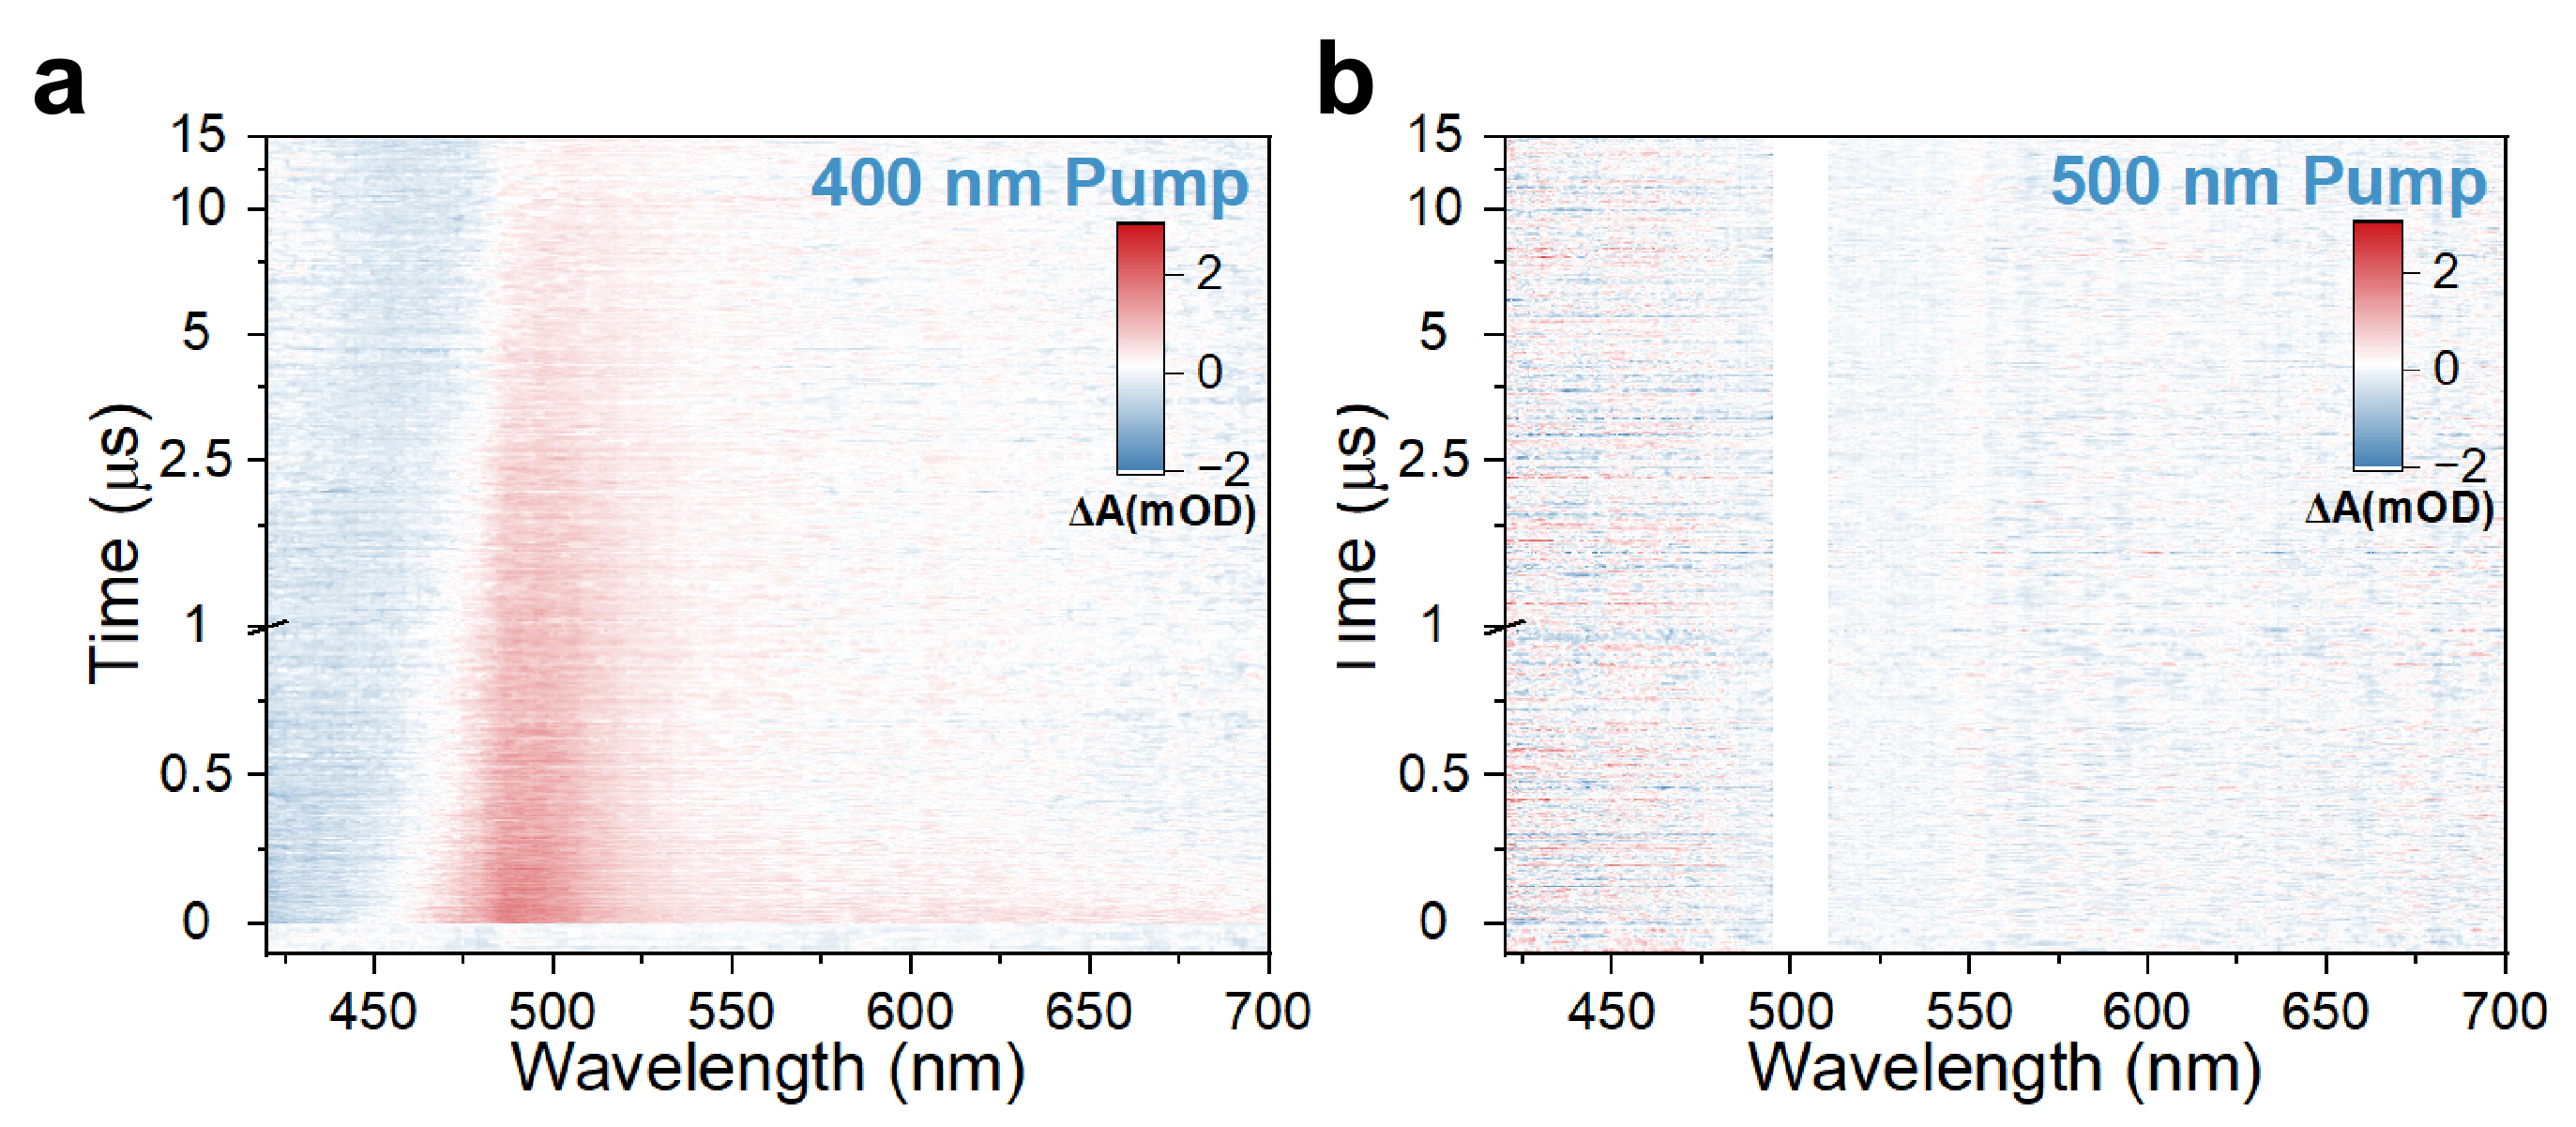


**Supplementary Fig. 7| Excitation-wavelength-dependent microsecond transient absorption spectra of the BR-HSA complex. (a)** Microsecond transient absorption map of the BR-HSA complex recorded following 400 nm excitation. A long-lived positive absorption band appears in the visible region, indicating the formation of a persistent photoproduct under blue-light excitation. **(b)** Microsecond transient absorption map recorded following 500 nm excitation. No appreciable long-lived transient absorption signal is observed within the same detection window, indicating that blue-green excitation does not lead to accumulation of the long-lived photoproduct detected under 400 nm excitation.


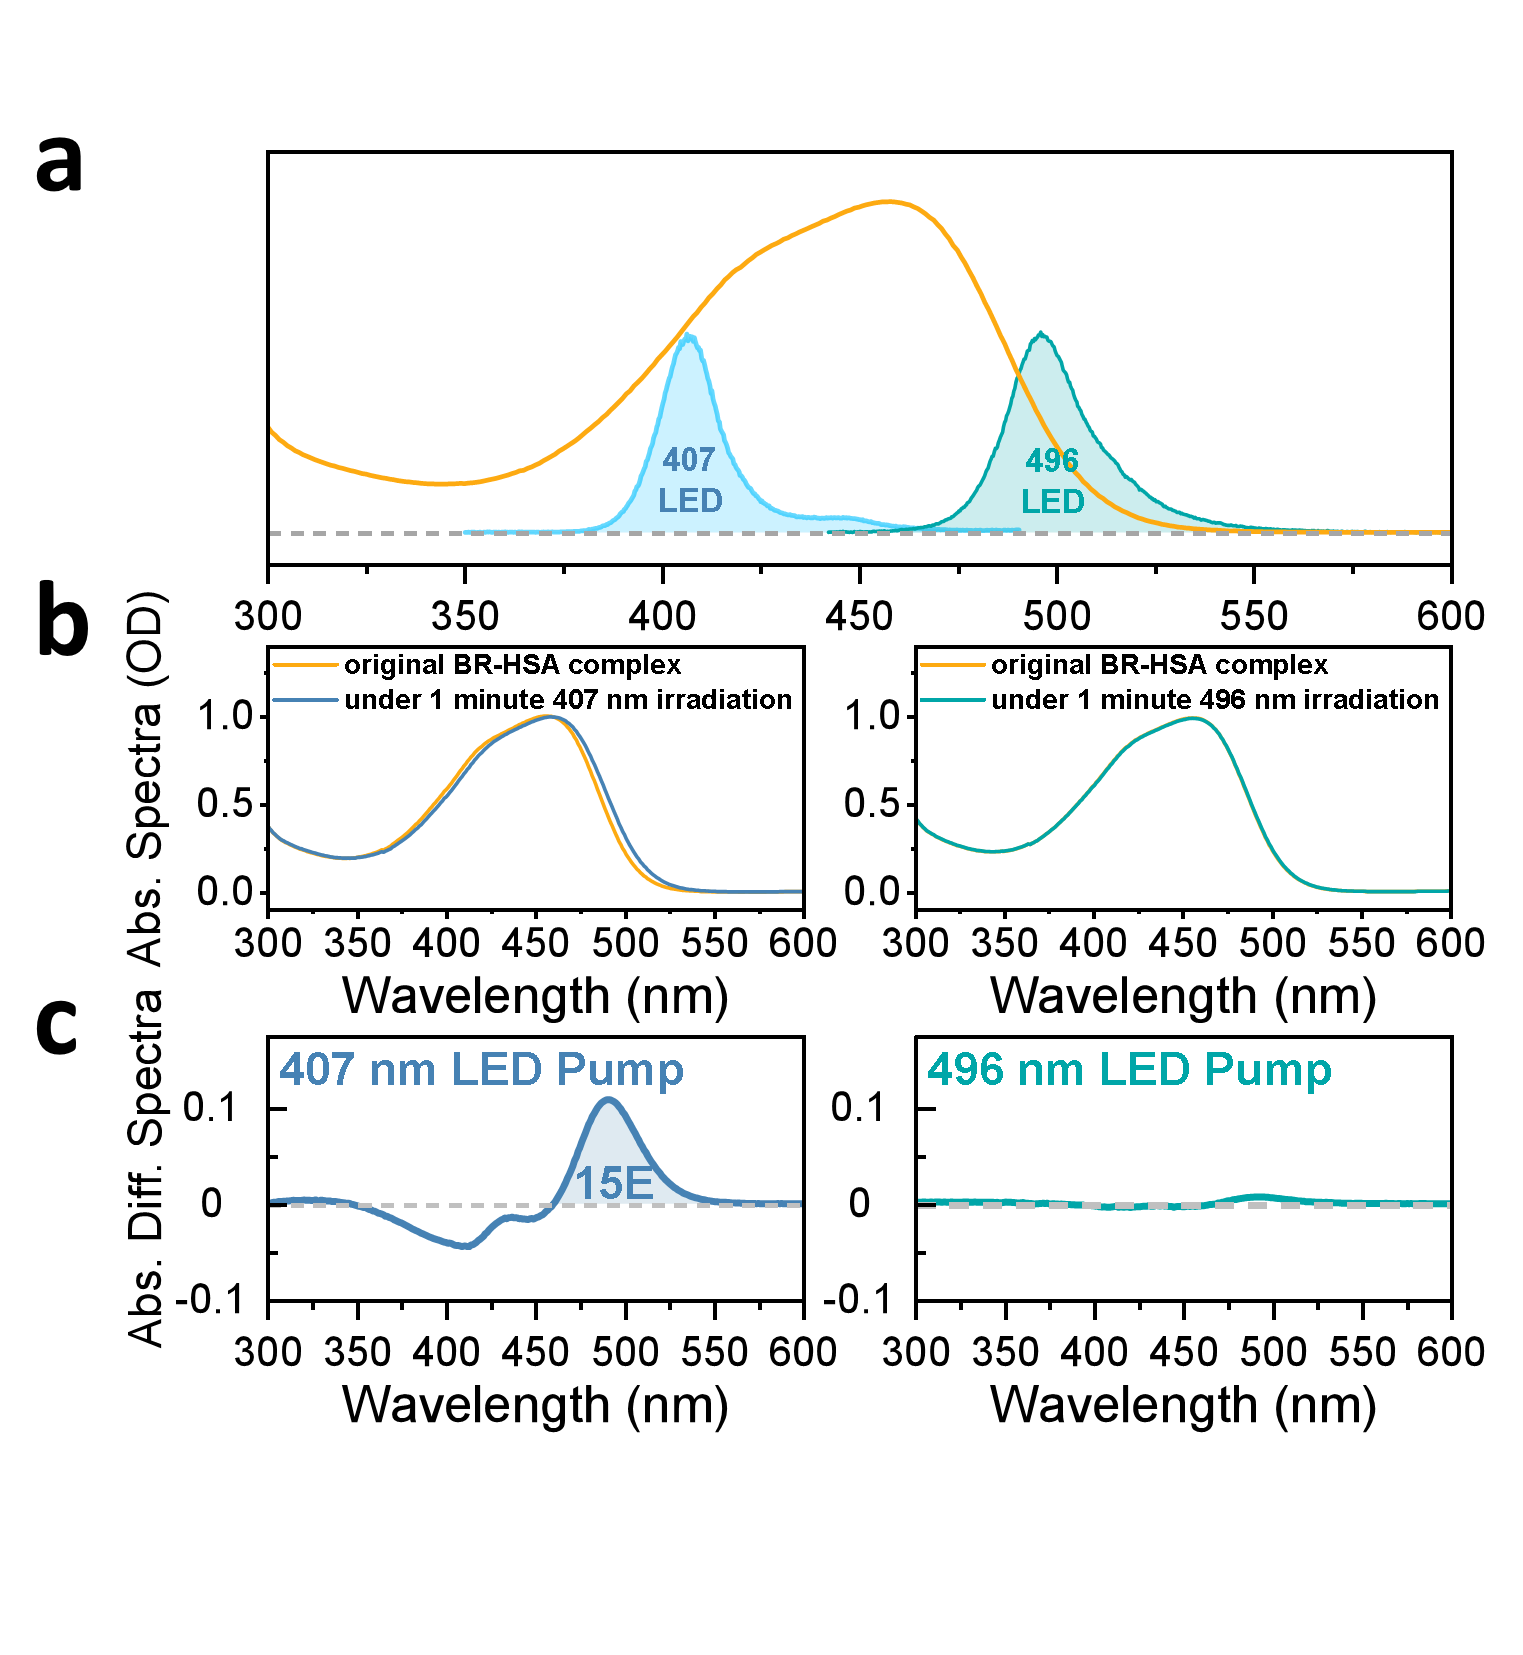


**Supplementary Fig. 8| LED-irradiation-induced absorbance difference spectra of BR-HSA complex.** **(a)** Emission profiles of the 407 nm and 496 nm LEDs overlaid with the steady-state absorption spectrum of the BR–HSA complex. The BR-HSA samples were irradiated with the 407 nm LED at ~0.20 mW/cm2 and the 496 nm LED at ~0.32 mW/cm2. The different irradiation powers were selected to compensate for the different absorbance of BR-HSA at the two excitation wavelengths, thereby providing comparable absorbed photon numbers. **(b)** Absorption spectra of the BR-HSA complex before and after 1 min irradiation with the 407 nm or 496 nm LED. Irradiation at 407 nm induces an evident new absorption feature in the 470-550 nm region, consistent with formation of a long-lived configurational photoproduct, 4Z,15E-BR. In contrast, 496 nm irradiation produces no appreciable spectral shift under the same absorbed-photon condition. **(c)** Absorbance difference spectra of the BR-HSA complex measured after 1 min LED irradiation. A pronounced positive difference signal is observed only after 407 nm irradiation, whereas 496 nm irradiation produces negligible long-lived absorption changes. As shown by the TD-DFT calculations in Fig. 2 (d), and (i) in main text, the S1 and S2 transition energies of 4Z,15E-BR (in the IB pocket) are both lower than those of 4Z,15Z-BR (in the IIA pocket), indicating that the 4Z,15E isomer should absorb at longer wavelengths than native 4Z,15Z-BR. This calculated red shift is consistent with the positive long-wavelength absorption feature in the 470-550 nm observed in **(c)** after 407 nm irradiation, supporting the assignment of the long-lived photoproduct to 4Z,15E-BR.


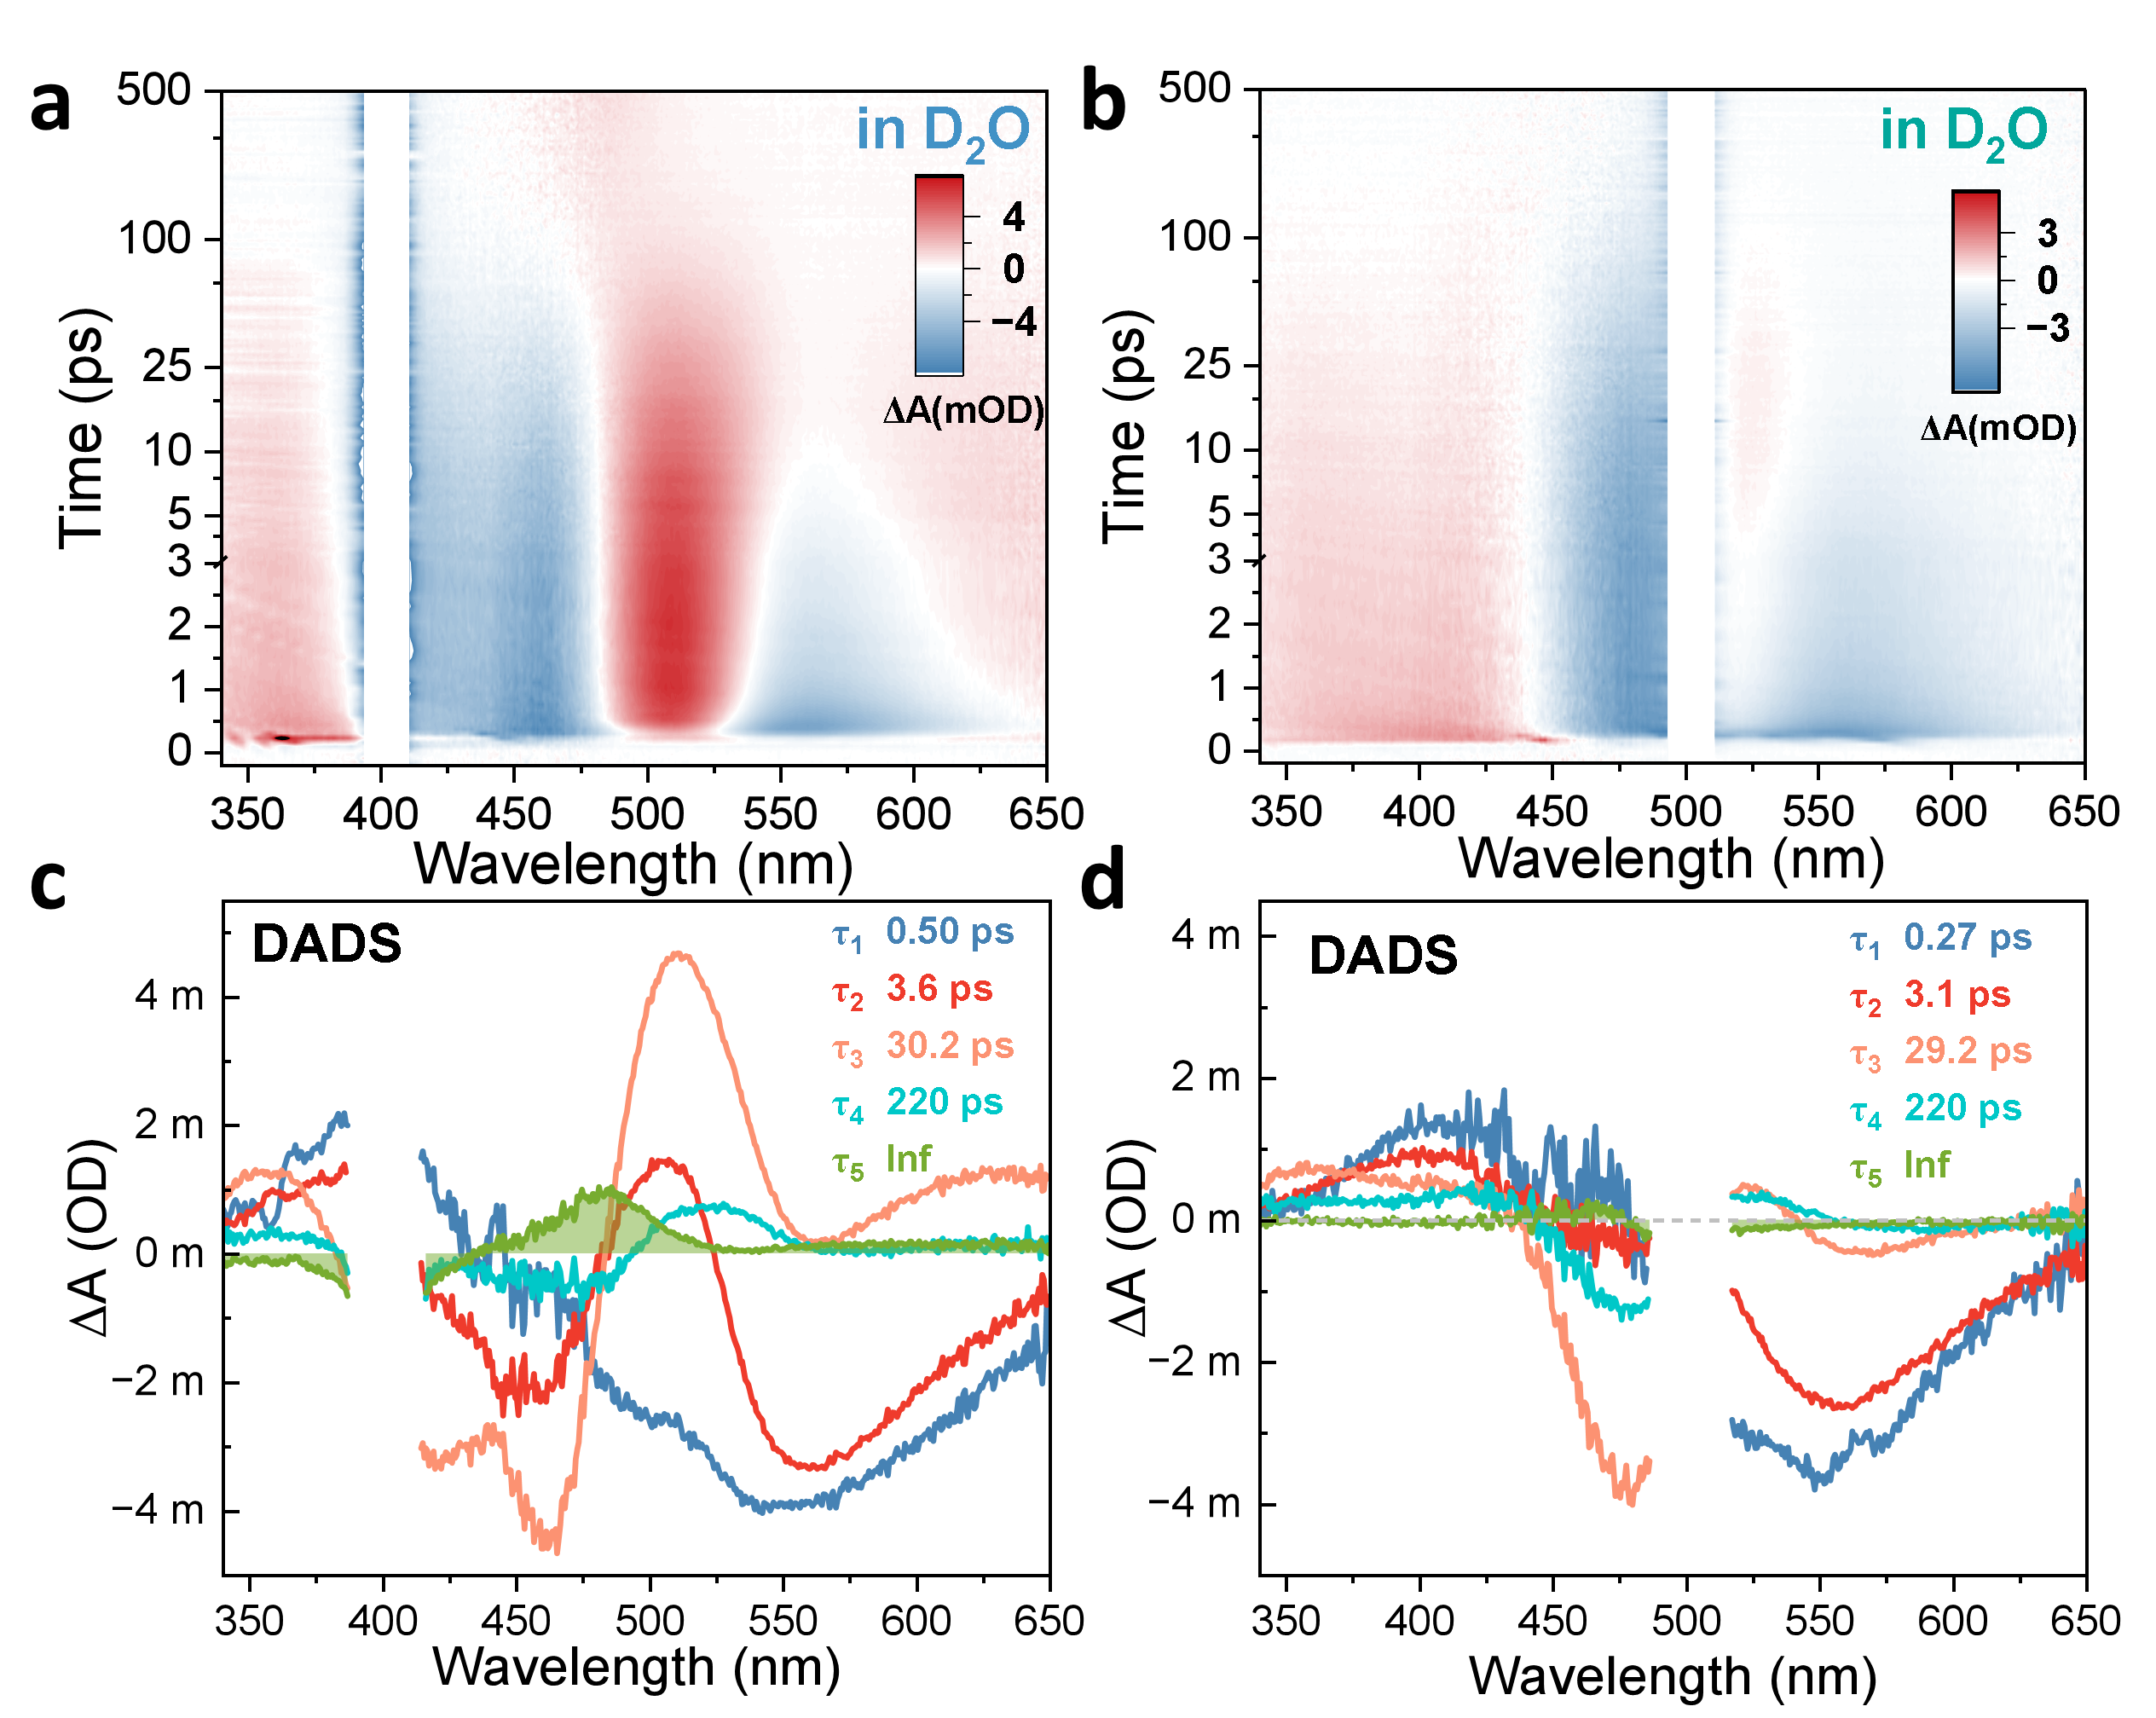


**Supplementary Fig. 9| Excitation-wavelength-dependent fs-TA spectra and DADS analysis of the BR-HSA complex in D2O.** Two-dimensional fs-TA maps and DADS of the BR-HSA complex measured in D2O following excitation at **(a, c)** 400 nm pump; **(b, d)** 500 nm pump. Global analysis reveals isotope-dependent changes in the relaxation time constants relative to those measured in H2O, indicating that proton-transfer-associated nuclear motion contributes to the excited-state relaxation dynamics. Under 400 nm excitation, τ1, τ2, τ3 and τ₄ change from 0.54, 3.2, 21.8 and 150 ps in H₂O to 0.50, 3.6, 30.2 and 220 ps in D2O, giving KIE values of ~1, 1.13, 1.38 and 1.47, respectively. Under 500 nm excitation, the corresponding lifetimes change from 0.17, 1.8, 17.5 and 150 ps in H2O to 0.27, 3.1, 29.2 and 220 ps in D2O, giving KIE values of 1.59, 1.72, 1.67 and 1.47, respectively. The stronger isotope effect under 500 nm excitation indicates that the low-energy exciton pathway is more strongly coupled to proton-transfer-associated relaxation dynamics.

**Section 4. MD simulations and TD-DFT calculations**


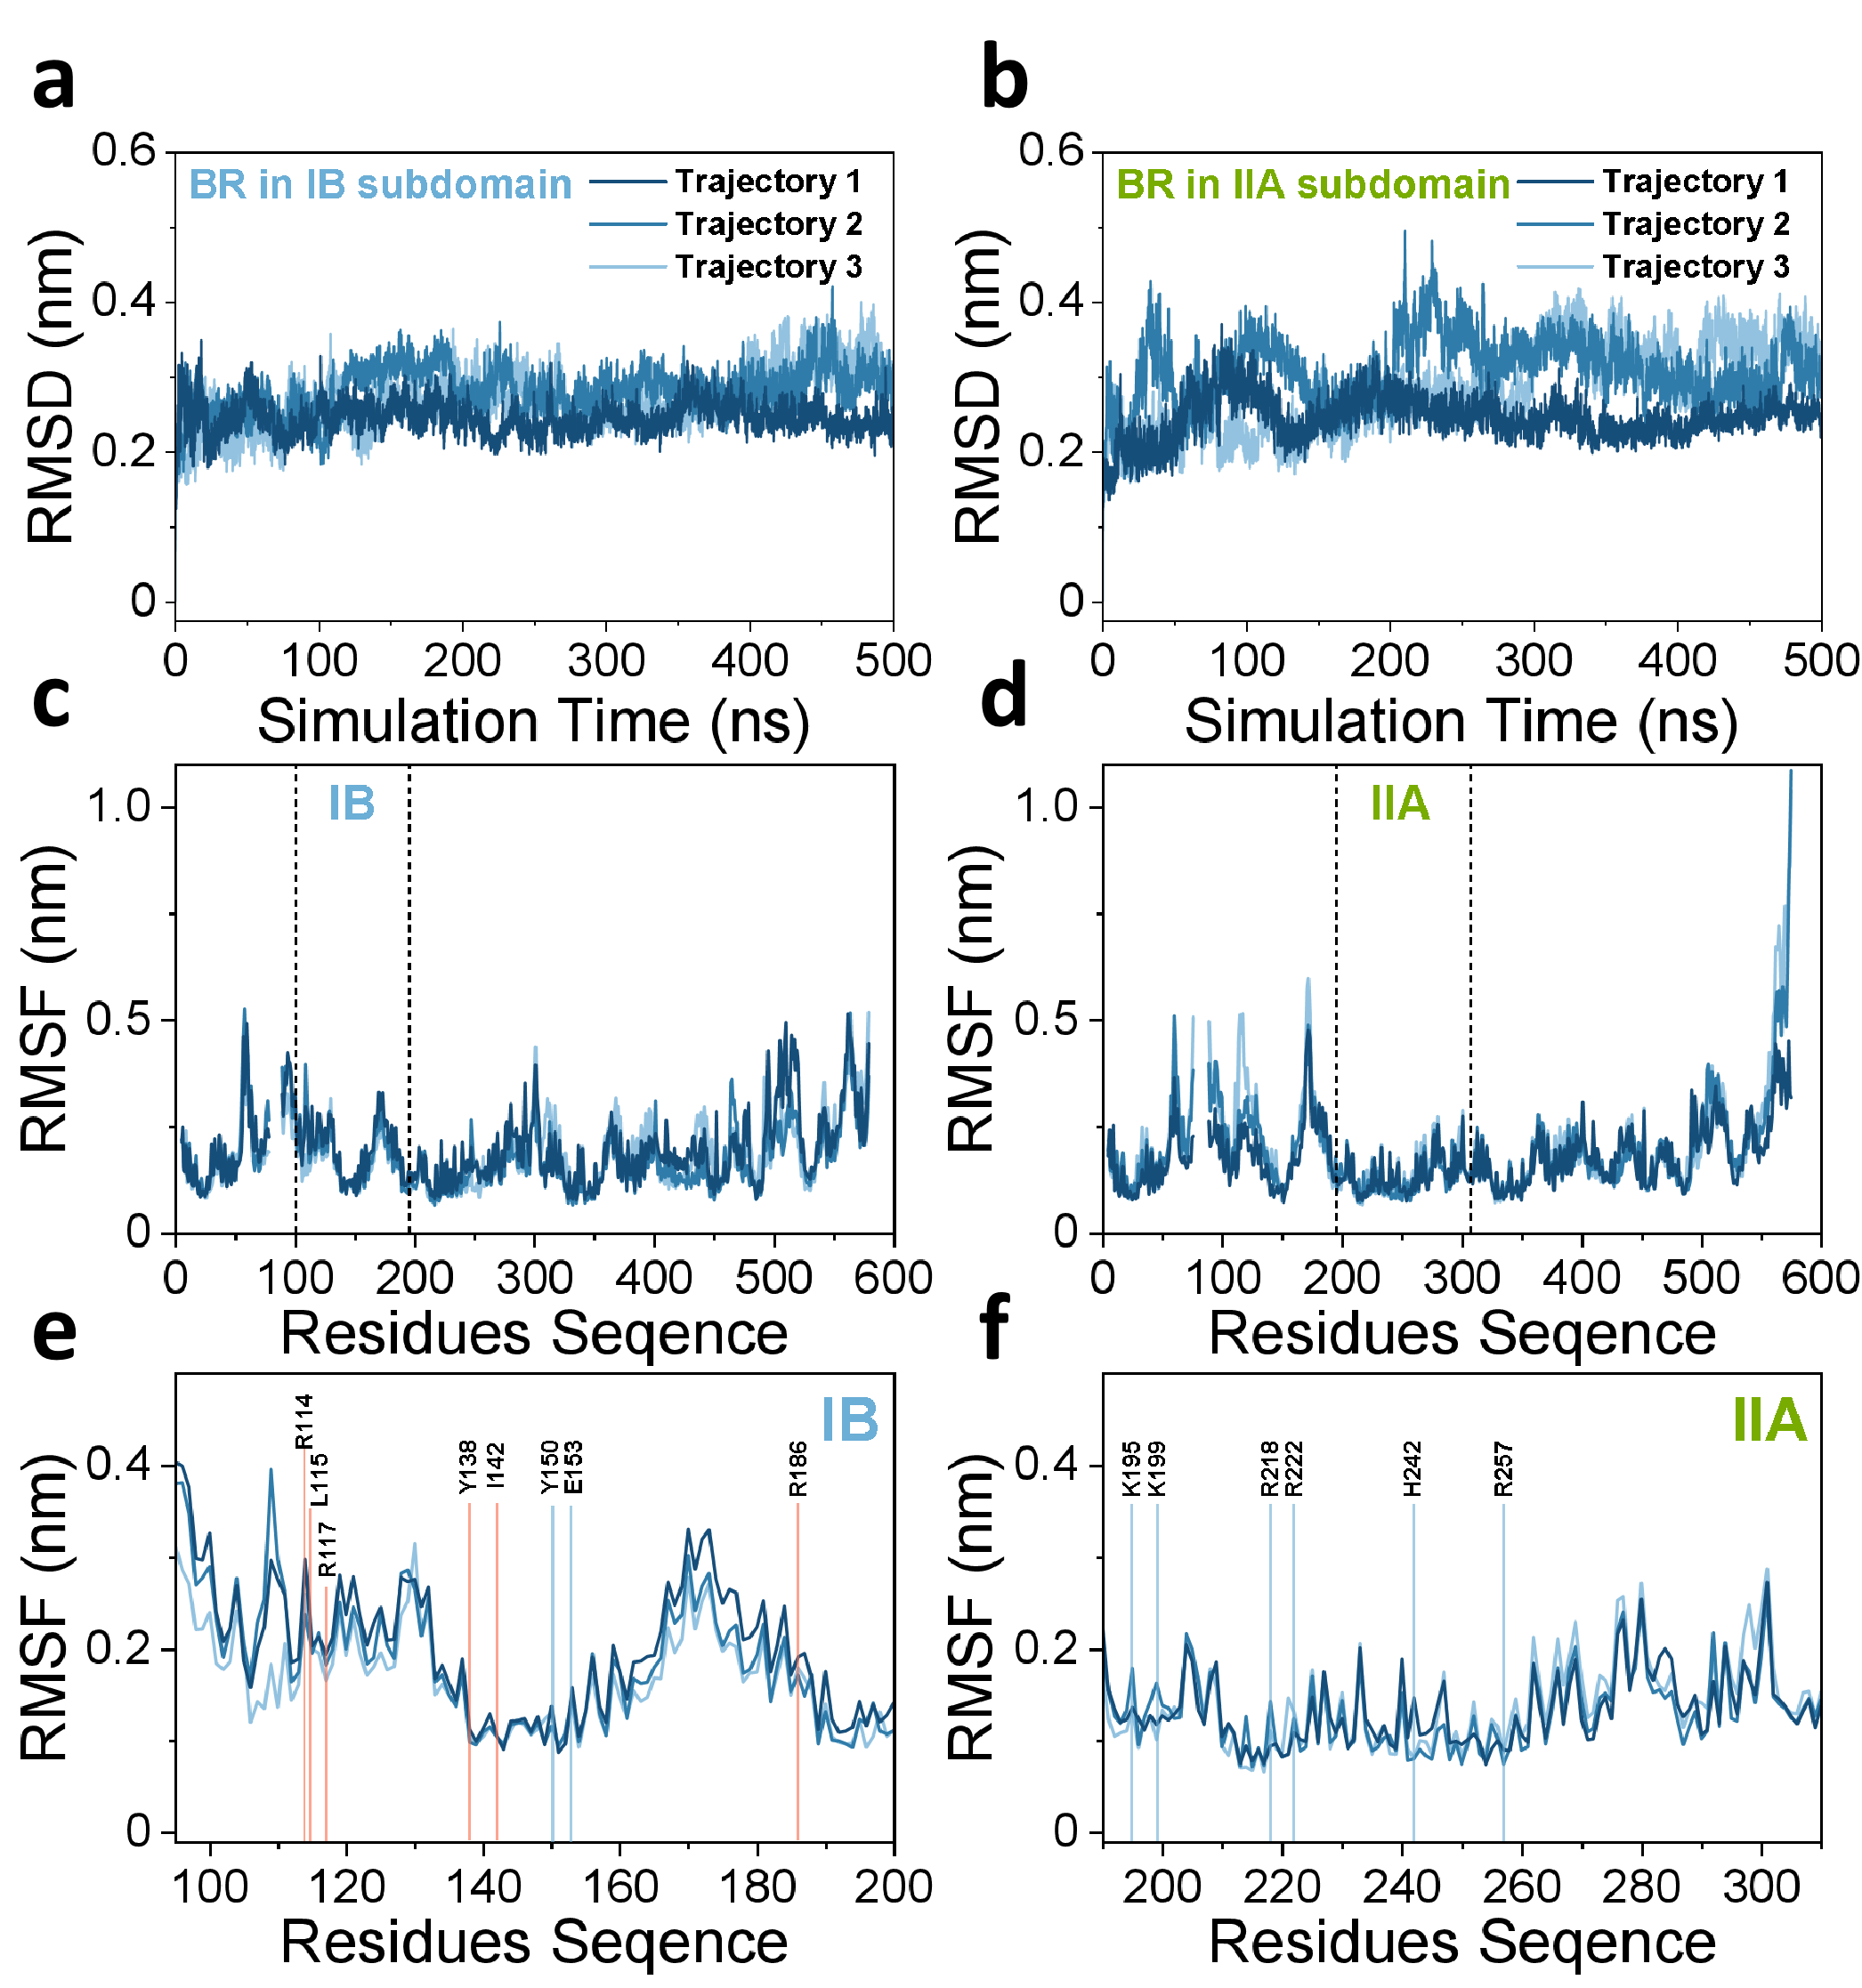


**Supplementary Fig. 10| RMSD and RMSF data. (a, c, e)** Root-mean-square deviation (RMSD) and root-mean-square fluctuation (RMSF) of the BR-HSA complex in the IB sub-domain were calculated relative to the crystal structure. The RMSD exhibits minor fluctuations throughout the simulation, indicating that the system undergoes only typical thermal motions under equilibrium conditions and maintains a stable conformation. RMSF analysis as a function of residue number reveals that residues within the IB domain exhibit relatively high stability, with fluctuations ranging from approximately 0.1 to 0.3 nm. **(b, d,** **f)** RMSD and RMSF between the instantaneous computed structures and the molecular docking structure for the BR-HSA complex in IIA sub-domain. RMSD analysis reveals overall structural stability throughout the simulation, albeit with minor fluctuations. These fluctuations can be attributed to the instability of the terminal residues (550-585) of HSA, as reflected in the RMSF profile. Importantly, this terminal flexibility does not compromise the stability of the IIA domain, where residue fluctuations remain low, approximately 0.1 nm.


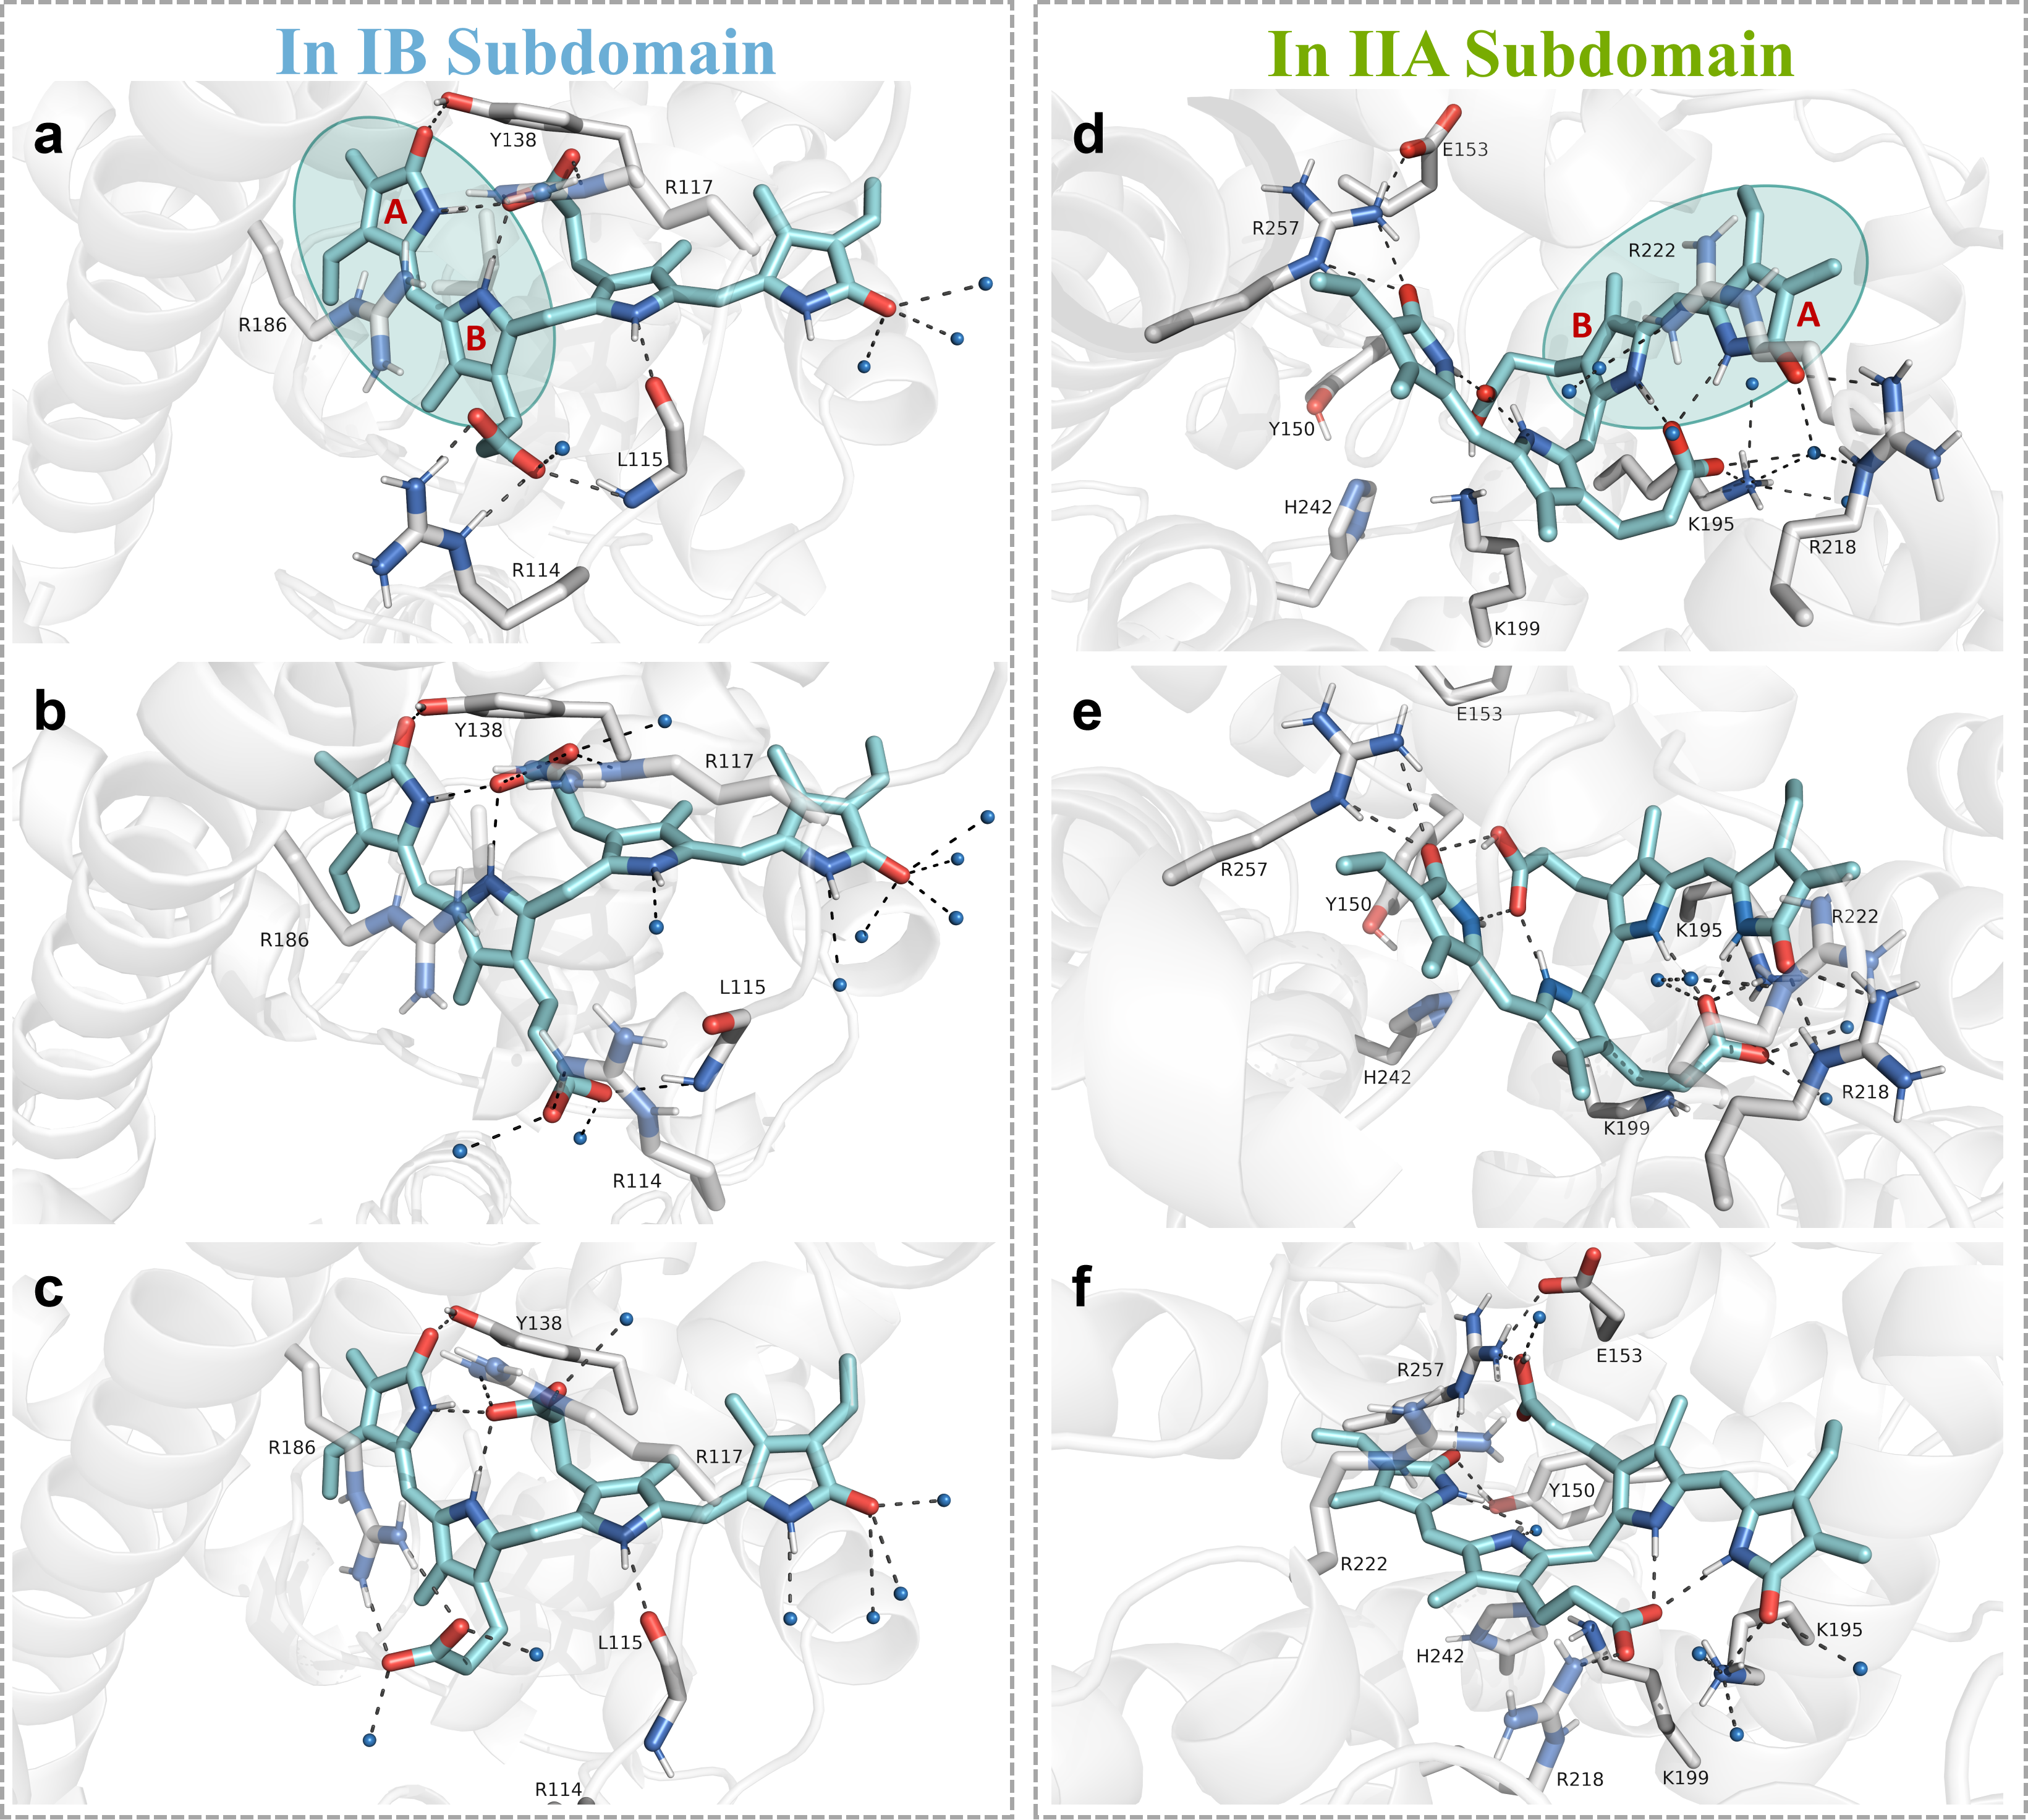


**Supplementary Fig. 11| The three snapshots extracted from the three sets of MD simulations for the BR-HSA complex. (a, b,** **c)** in the IB subdomain, which based on crystal structure combined with sub-domiain IB (PDB ID: 2VUE). **(d, e,** **f)** in the IIA subdomain, which based on molecular docking combined with sub-domiain IB, only retain the water molecules that are adjacent to the BR area. The cyan arc encloses the AB moiety of BR. Within the IB sub-domain, the MD simulations result consistently show that BR forms stable hydrogen bonds with R117 and Y138. In contrast, the hydrogen bonds involving R114, L115, and R186 are unstable. Additionally, the CD moiety of BR remains largely exposed to the external aqueous environment. Within the IIA domain, MD simulations based on the optimal docking conformation reveal that BR forms hydrogen bonds with R218, R257, and K195. The AB moiety of BR is surrounded by neighboring residues and free water molecules.


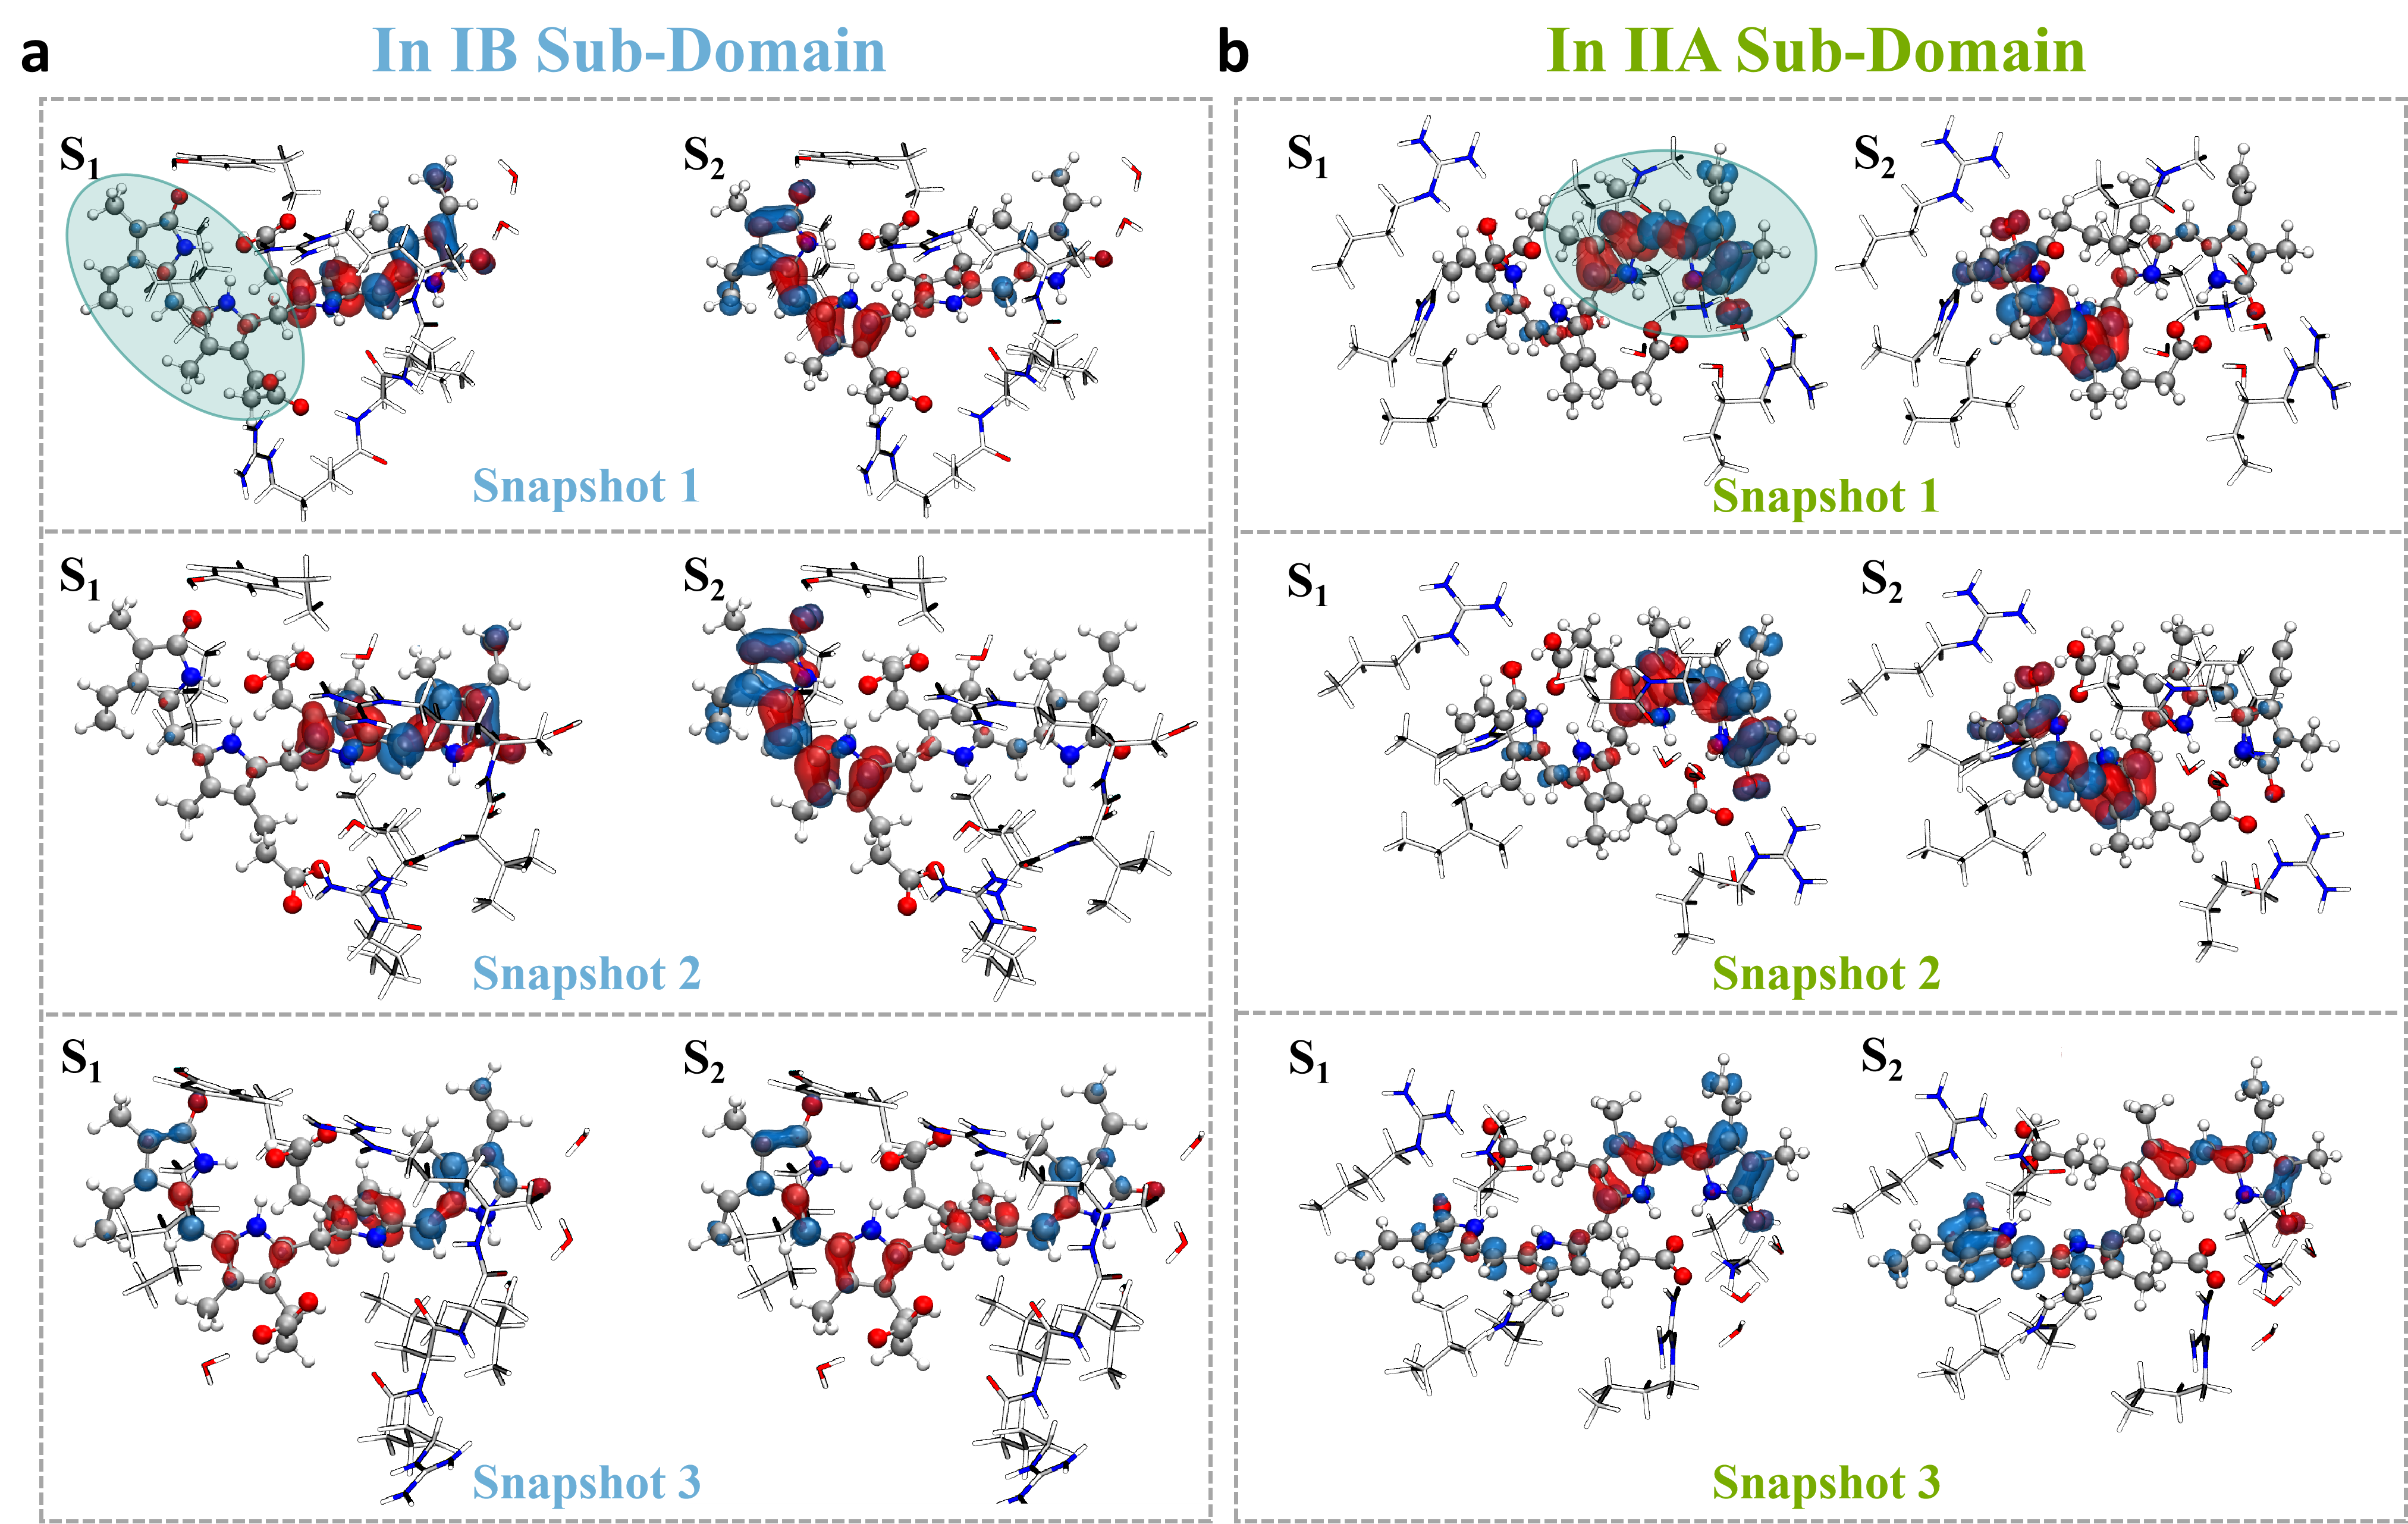


**Supplementary Fig. 12| Electronic-hole analysis based on the TD-DFT method. (a)** and **(b)** Random snapshots extracted from three independent MD simulation trajectories were subjected to electron-hole analysis to determine the transition distributions of different excited states. In the analysis, the red isosurface represents the hole distribution, and the blue isosurface represents the electron distribution (isovalue: 0.002). For the IB domain, several residues surrounding BR, including R114, L115, V116, R117, Y138, I142, and R186, were included in the calculations. For the IIA domain, residues including Y150, E153, K195, R218, R222, L238, H242, R257, and A291 were included. In all calculations, the selected residues were truncated and saturated with methyl caps. Some residues and water molecules are omitted in the figures for clarity. The cyan arc encloses the AB moiety of BR.

**Table 2 Under three sets of independent MD simulations, the transition energies and oscillator strengths of the first six excited states corresponding to the randomly selected three snapshots.**

|  |  | **Vertical excitation energy (Oscillator strength)** | | |
| --- | --- | --- | --- | --- |
|  |  | Snapshot 1 | Snapshot 2 | Snapshot 3 |
| In IB Sub-domain | S1 | 2.86 eV, 433.51 nm (1.0679) | 2.77 eV, 447.60 nm (1.1982) | 2.82 eV, 439.66 nm (1.0203) |
| S2 | 3.07 eV, 403.86 nm (0.6227) | 3.08 eV, 402.55 nm (0.6101) | 3.00 eV, 413.28 nm (0.5933) |
| S3 | 3.98 eV, 311.52 nm (0.0008) | 3.86 eV, 321.20 nm (0.0037) | 3.91 eV, 317.10 nm (0.0026) |
| S4 | 4.05 eV, 306.13 nm (0.0023) | 4.04 eV, 306.89 nm (0.0070) | 4.05 eV, 306.13 nm (0.0011) |
| S5 | 4.12 eV, 300.93 nm (0.0392) | 4.06 eV, 305.38 nm (0.0280) | 4.07 eV, 304.63 nm (0.0515) |
| S6 | 4.16 eV, 298.04 nm (0.1321) | 4.18 eV, 296.61 nm (0.1101) | 4.10 eV, 302.40 nm (0.1262) |
| In IIA Sub-domain | S1 | 2.93 eV, 423.15 nm (1.2852) | 2.87 eV, 432.00 nm (1.2117) | 2.88 eV, 430.50 nm (2.0022) |
| S2 | 3.18 eV, 388.89 nm (0.6885) | 3.10 eV, 399.95 nm (0.6397) | 3.11 eV, 398.66 nm (0.0376) |
| S3 | 3.80 eV, 326.27 nm (0.0180) | 3.63 eV, 341.55 nm (0.0255) | 3.85 eV, 322.04 nm (0.0330) |
| S4 | 3.96 eV, 313.09 nm (0.0153) | 3.95 eV, 313.88 nm (0.0166) | 4.12 eV, 300.93 nm (0.0262) |
| S5 | 4.16 eV, 298.04 nm (0.0110) | 4.12 eV, 300.93 nm (0.0106) | 4.15 eV, 298.76 nm (0.1385) |
| S6 | 4.23 eV, 293.11 nm (0.1116) | 4.30 eV, 288.34 nm (0.1338) | 4.19 eV, 295.91 nm (0.0061) |

**Table 3. For the BR in the IB domain, the analysis of the electronic holes corresponding to the excited states of S1 and S2.**

| **Sub-domain** | **Trajectory** | **Excited State** | **Orbital** | **Hole** | **Electron** |
| --- | --- | --- | --- | --- | --- |
| IB | 1 | S1 | HOMO-1 | 43.60 % | 0.00 % |
| HOMO | 52.39 % | 0.00 % |
| LUMO | 0.00 % | 73.77 % |
| LUMO+1 | 0.00 % | 22.23 % |
| S2 | HOMO-1 | 40.06 % | 0.00 % |
| HOMO | 57.50 % | 0.00 % |
| LUMO | 0.00 % | 30.74 % |
| LUMO+1 | 0.00 % | 66.83 % |
| 2 | S1 | HOMO-1 | 29.46 % | 0.00 % |
| HOMO | 68.60 % | 0.00 % |
| LUMO | 0.00 % | 86.52 % |
| LUMO+1 | 0.00 % | 11.54 % |
| S2 | HOMO-1 | 51.18 % | 0.00 % |
| HOMO | 46.29 % | 0.00 % |
| LUMO | 0.00 % | 18.50 % |
| LUMO+1 | 0.00 % | 78.98 % |
| 3 | S1 | HOMO-1 | 41.21 % | 0.00 % |
| HOMO | 56.47 % | 0.00 % |
| LUMO | 0.00 % | 64.58 % |
| LUMO+1 | 0.00 % | 33.10 % |
| S2 | HOMO-1 | 40.67 % | 0.00 % |
| HOMO | 56.79 % | 0.00 % |
| LUMO | 0.00 % | 40.67 % |
| LUMO+1 | 0.00 % | 56.79 % |

**Table 4. For the BR in the IIA domain, the analysis of the electronic holes corresponding to the excited states of S1 and S2.**

| **Sub-domain** | **Trajectory** | **Excited State** | **Orbital** | **Hole** | **Electron** |
| --- | --- | --- | --- | --- | --- |
| IIA | 1 | S1 | HOMO-1 | 49.74 % | 0.00 % |
| HOMO | 48.00 % | 0.00 % |
| LUMO | 0.00 % | 12.43 % |
| LUMO+1 | 0.00 % | 85.31 % |
| S2 | HOMO-1 | 26.25 % | 0.00 % |
| HOMO | 71.81 % | 0.00 % |
| LUMO | 0.00 % | 86.95 % |
| LUMO+1 | 0.00 % | 11.12 % |
| 2 | S1 | HOMO-1 | 31.73 % | 0.00 % |
| HOMO | 66.28 % | 0.00 % |
| LUMO | 0.00 % | 13.41 % |
| LUMO+1 | 0.00 % | 84.61 % |
| S2 | HOMO-1 | 39.82 % | 0.00 % |
| HOMO | 58.23 % | 0.00 % |
| LUMO | 0.00 % | 85.57 % |
| LUMO+1 | 0.00 % | 12.47 % |
| 3 | S1 | HOMO-1 | 40.16 % | 0.00 % |
| HOMO | 57.41 % | 0.00 % |
| LUMO | 0.00 % | 35.78 % |
| LUMO+1 | 0.00 % | 61.79 % |
| S2 | HOMO-1 | 34.57 % | 0.00 % |
| HOMO | 63.25 % | 0.00 % |
| LUMO | 0.00 % | 71.80 % |
| LUMO+1 | 0.00 % | 26.02 % |

**
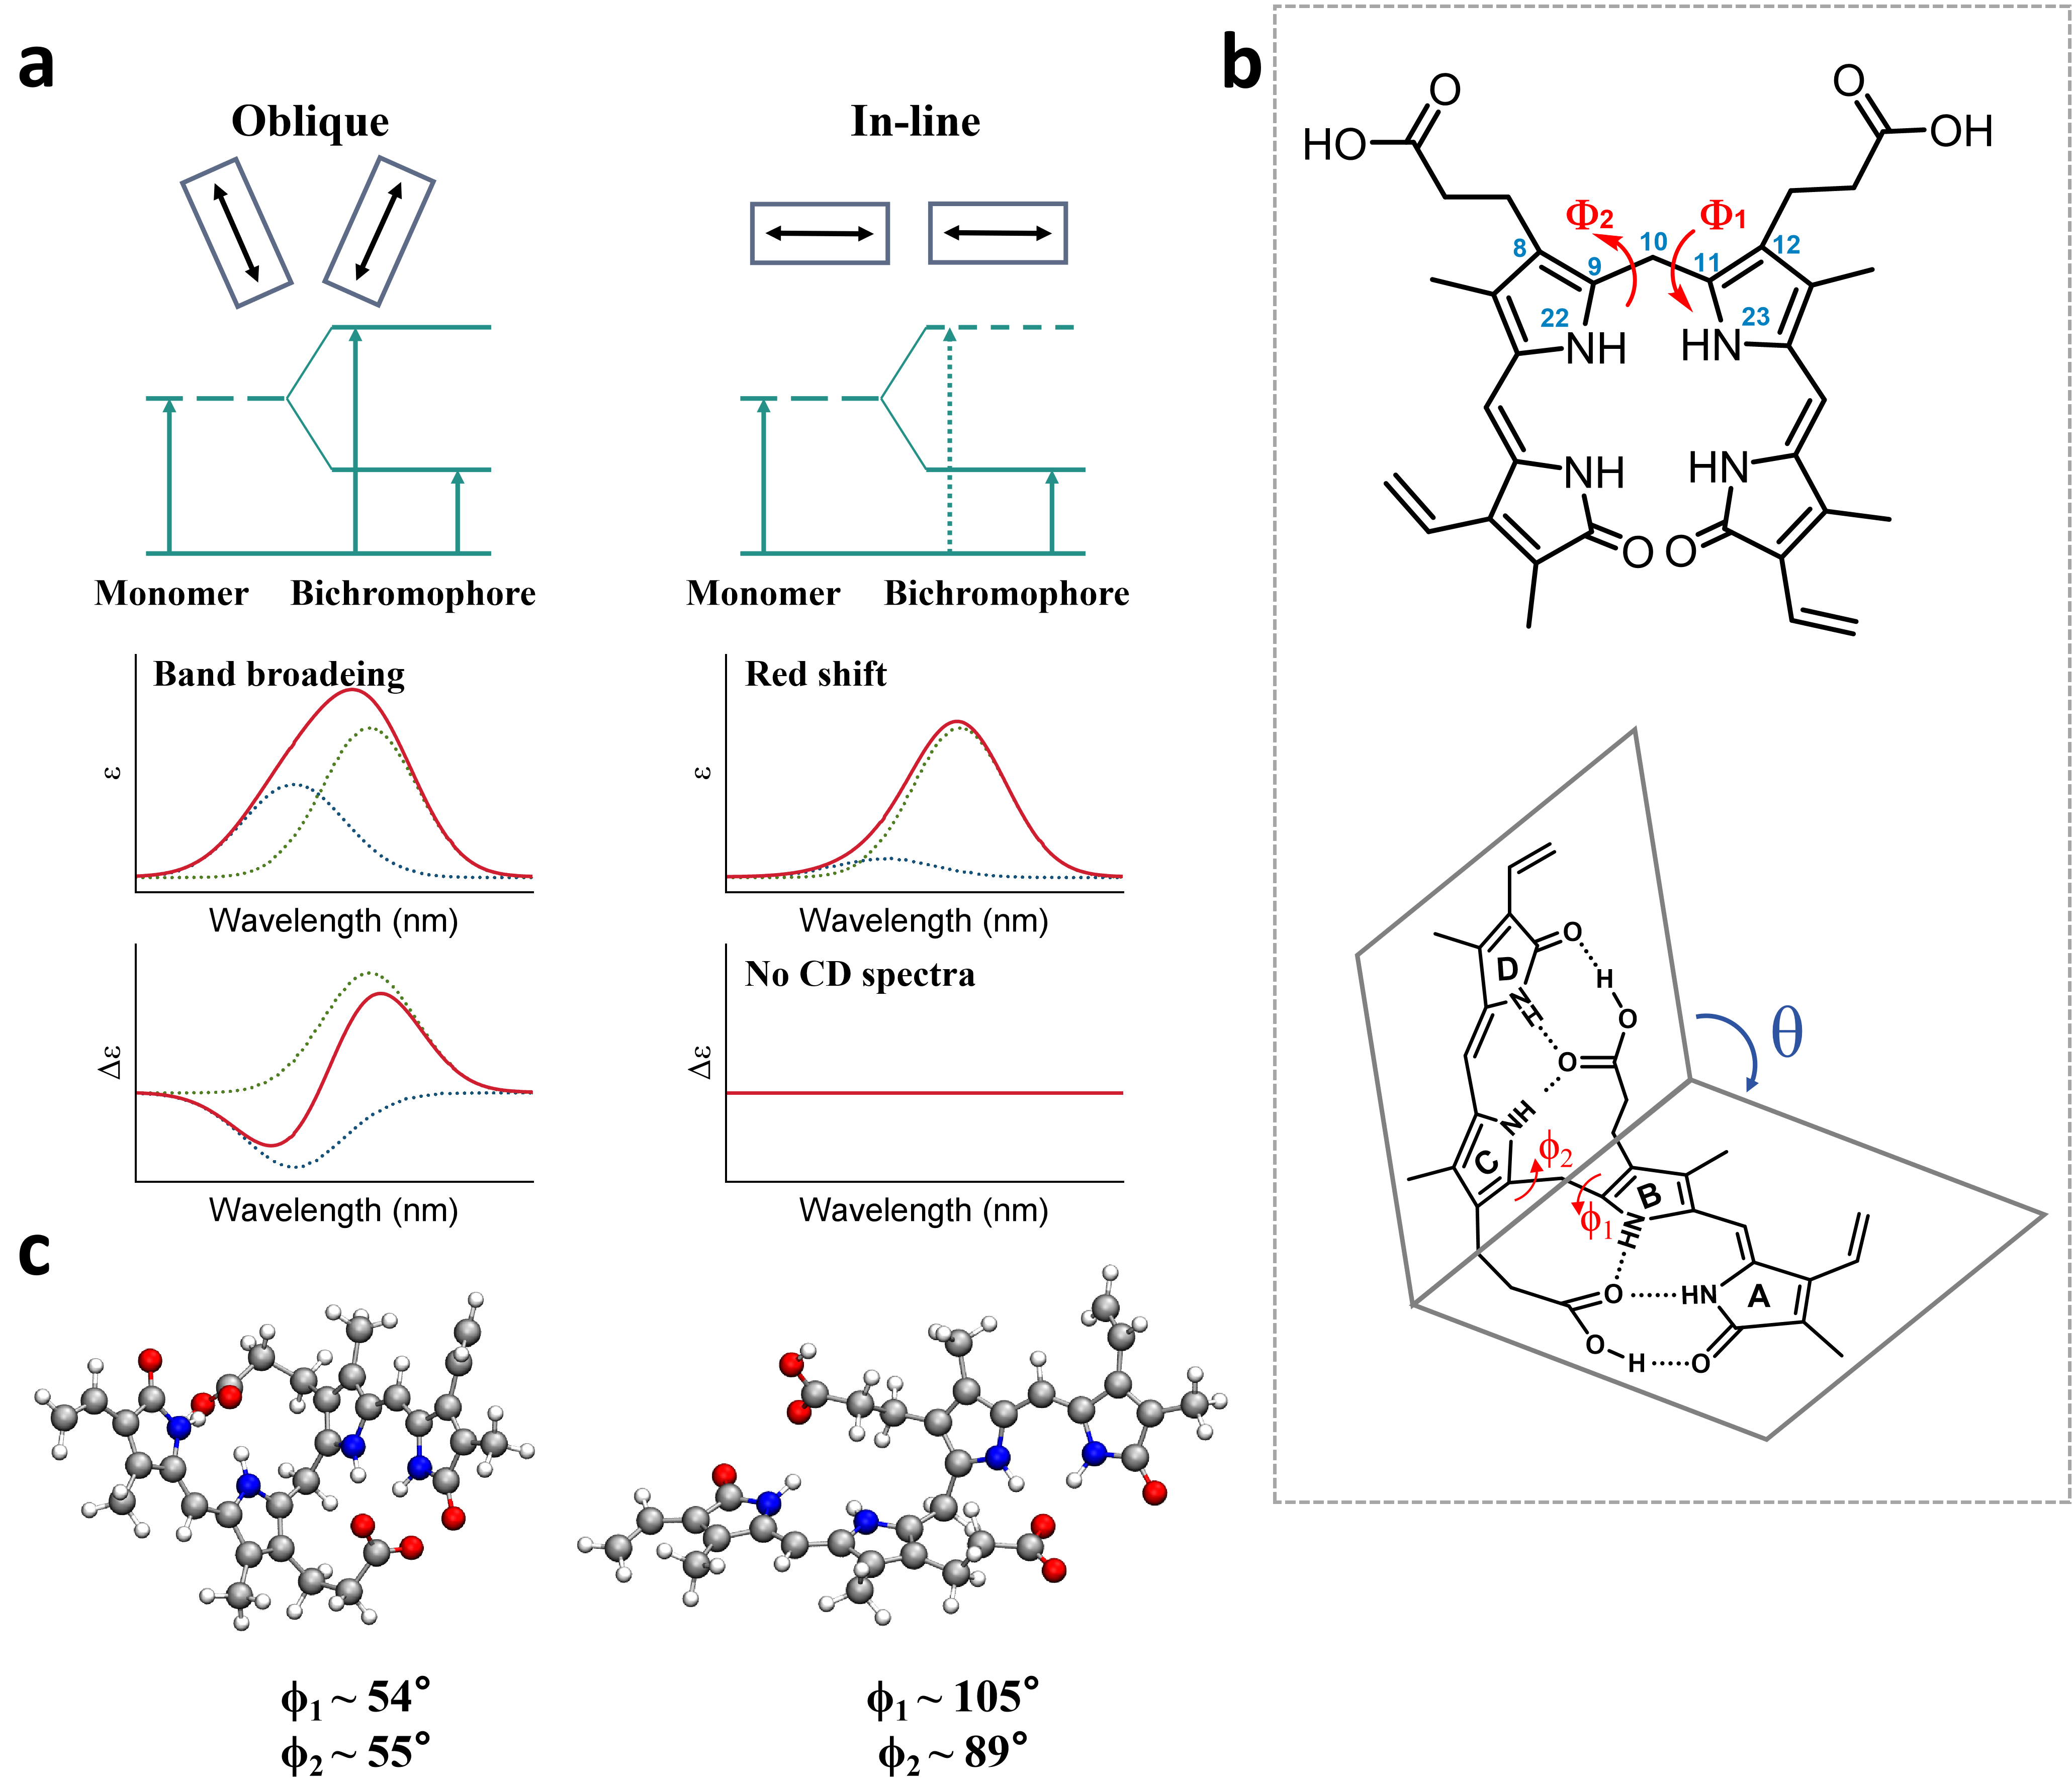
**

**Supplementary Fig. 13| The influence of dihedral angles on the energy of excited states.** **(a)** Schematic illustration of the orientation dependence of excitonic coupling between two chromophores, focusing on the oblique and in-line arrangements. The upper panels show the corresponding exciton-splitting diagrams, and the middle and bottom panels show the simulated UV-visible absorption and circular dichroism (CD) spectra. In the oblique arrangement, the two exciton states are both optically allowed and give rise to a bisignate CD signal. In the in-line arrangement, the high-energy exciton becomes weakly allowed, resulting in a red-shifted absorption dominated by the lower-energy exciton and an almost vanishing CD signal. The lower panels show representative molecular conformations corresponding to these two limiting arrangements. **(b)** Definition of the key torsional angles, φ1 (N22-C9-C10-C11) and φ2 (C9-C10-C11-N23), and the interchromophore dihedral angle θ that characterizes the relative orientation between the two dipyrrinone subunits of bilirubin (BR). **(c)** φ1 and φ2 determine the relative orientation θ between the two dipyrrinone chromophores and thereby control the exciton splitting, oscillator strengths, and CD response. When φ1 and φ2 are both close to 60°, corresponding to θ ≈ 100°, BR adopts the characteristic ridge–tile conformation, in which the two transition dipoles are arranged obliquely. This geometry produces two exciton states with comparable oscillator strengths (Supplementary Table 2) and a pronounced bisignate Cotton effect, consistent with the experimental CD spectrum (Fig. 2j). As φ1 and φ2 increase, the ridge–tile structure progressively opens toward a more in-line arrangement resembling a molecular J-aggregate. In this limit, the exciton transition shifts to lower energy, the oscillator strength of the high-energy exciton decreases markedly, and the CD signal nearly disappears. The third set of simulations for the IIA sub-domain, which deviates from the experimental spectra, therefore suggests that BR bound to HSA cannot adopt excessively large φ1 and φ2 values.


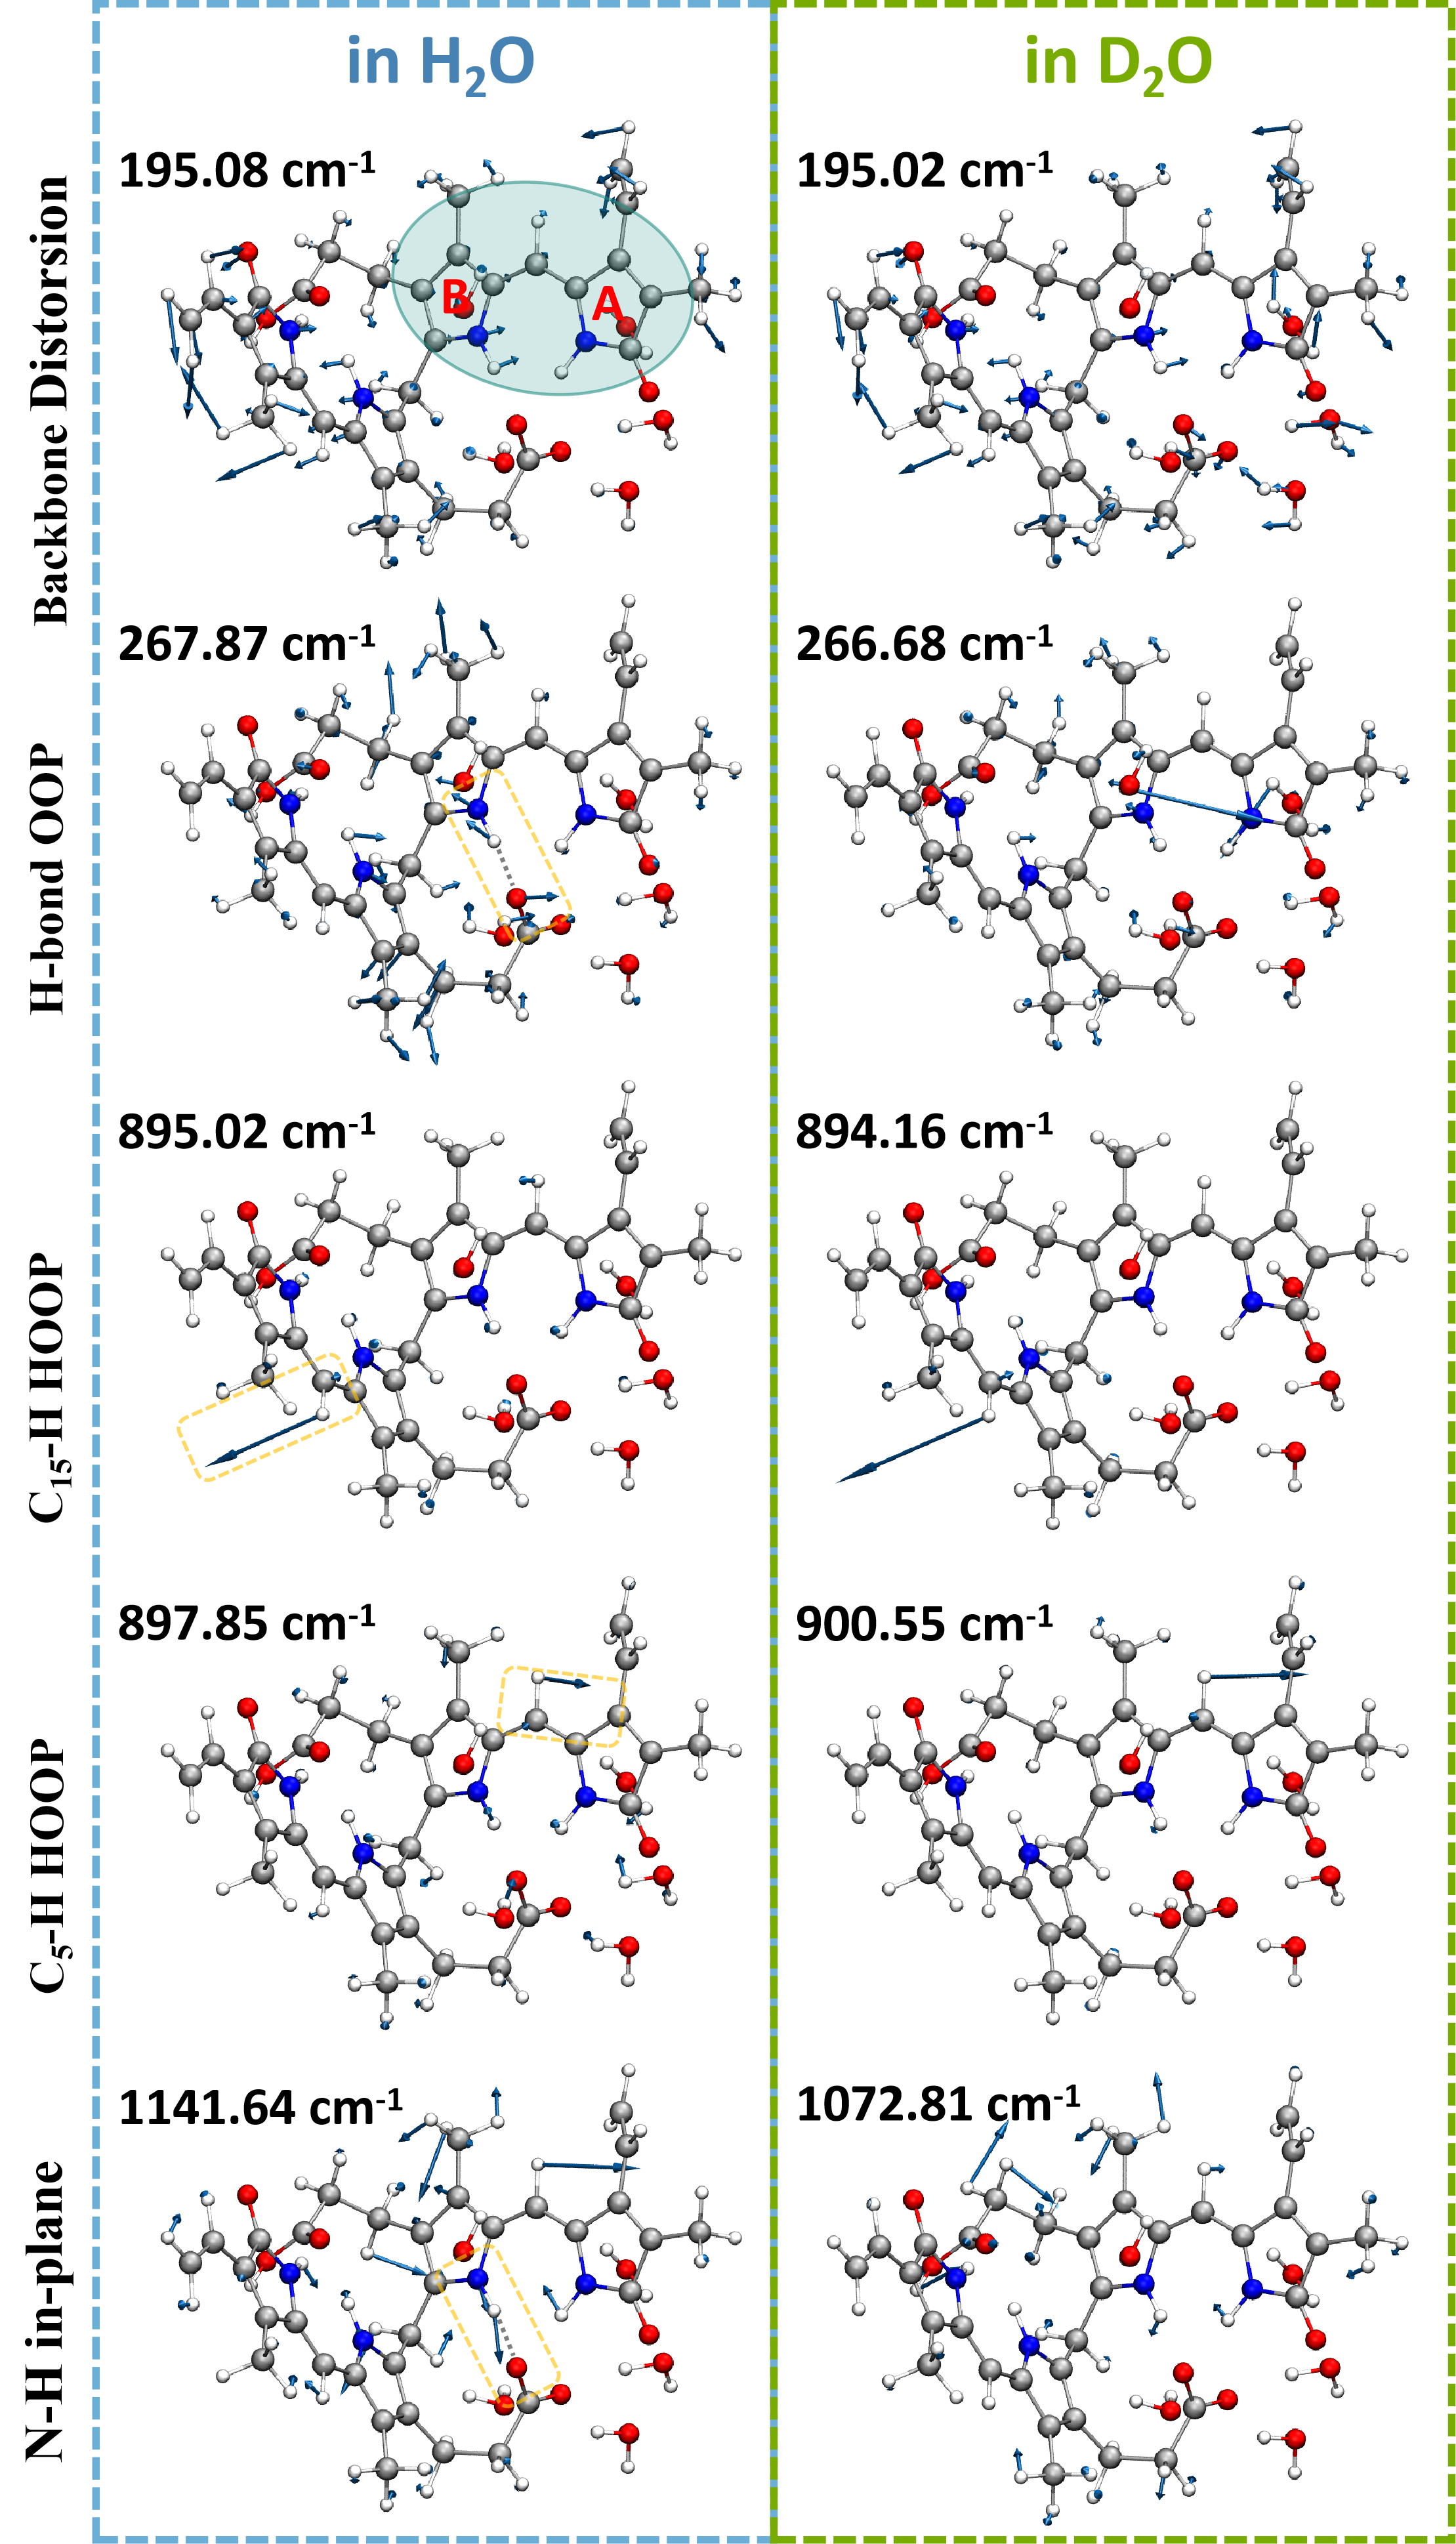


**Supplementary Fig. 14| DFT-calculated Raman-active vibrational modes of the BR-HSA complex model in H₂O and D₂O.** The cyan shaded region highlights the AB dipyrrinone moiety of BR, and surrounding protein residues are omitted for clarity. The yellow dashed box marks the main contributions of the vibration vectors in this mode. The grey dotted line marks the hydrogen bond between ring B and the carboxylate group.

**
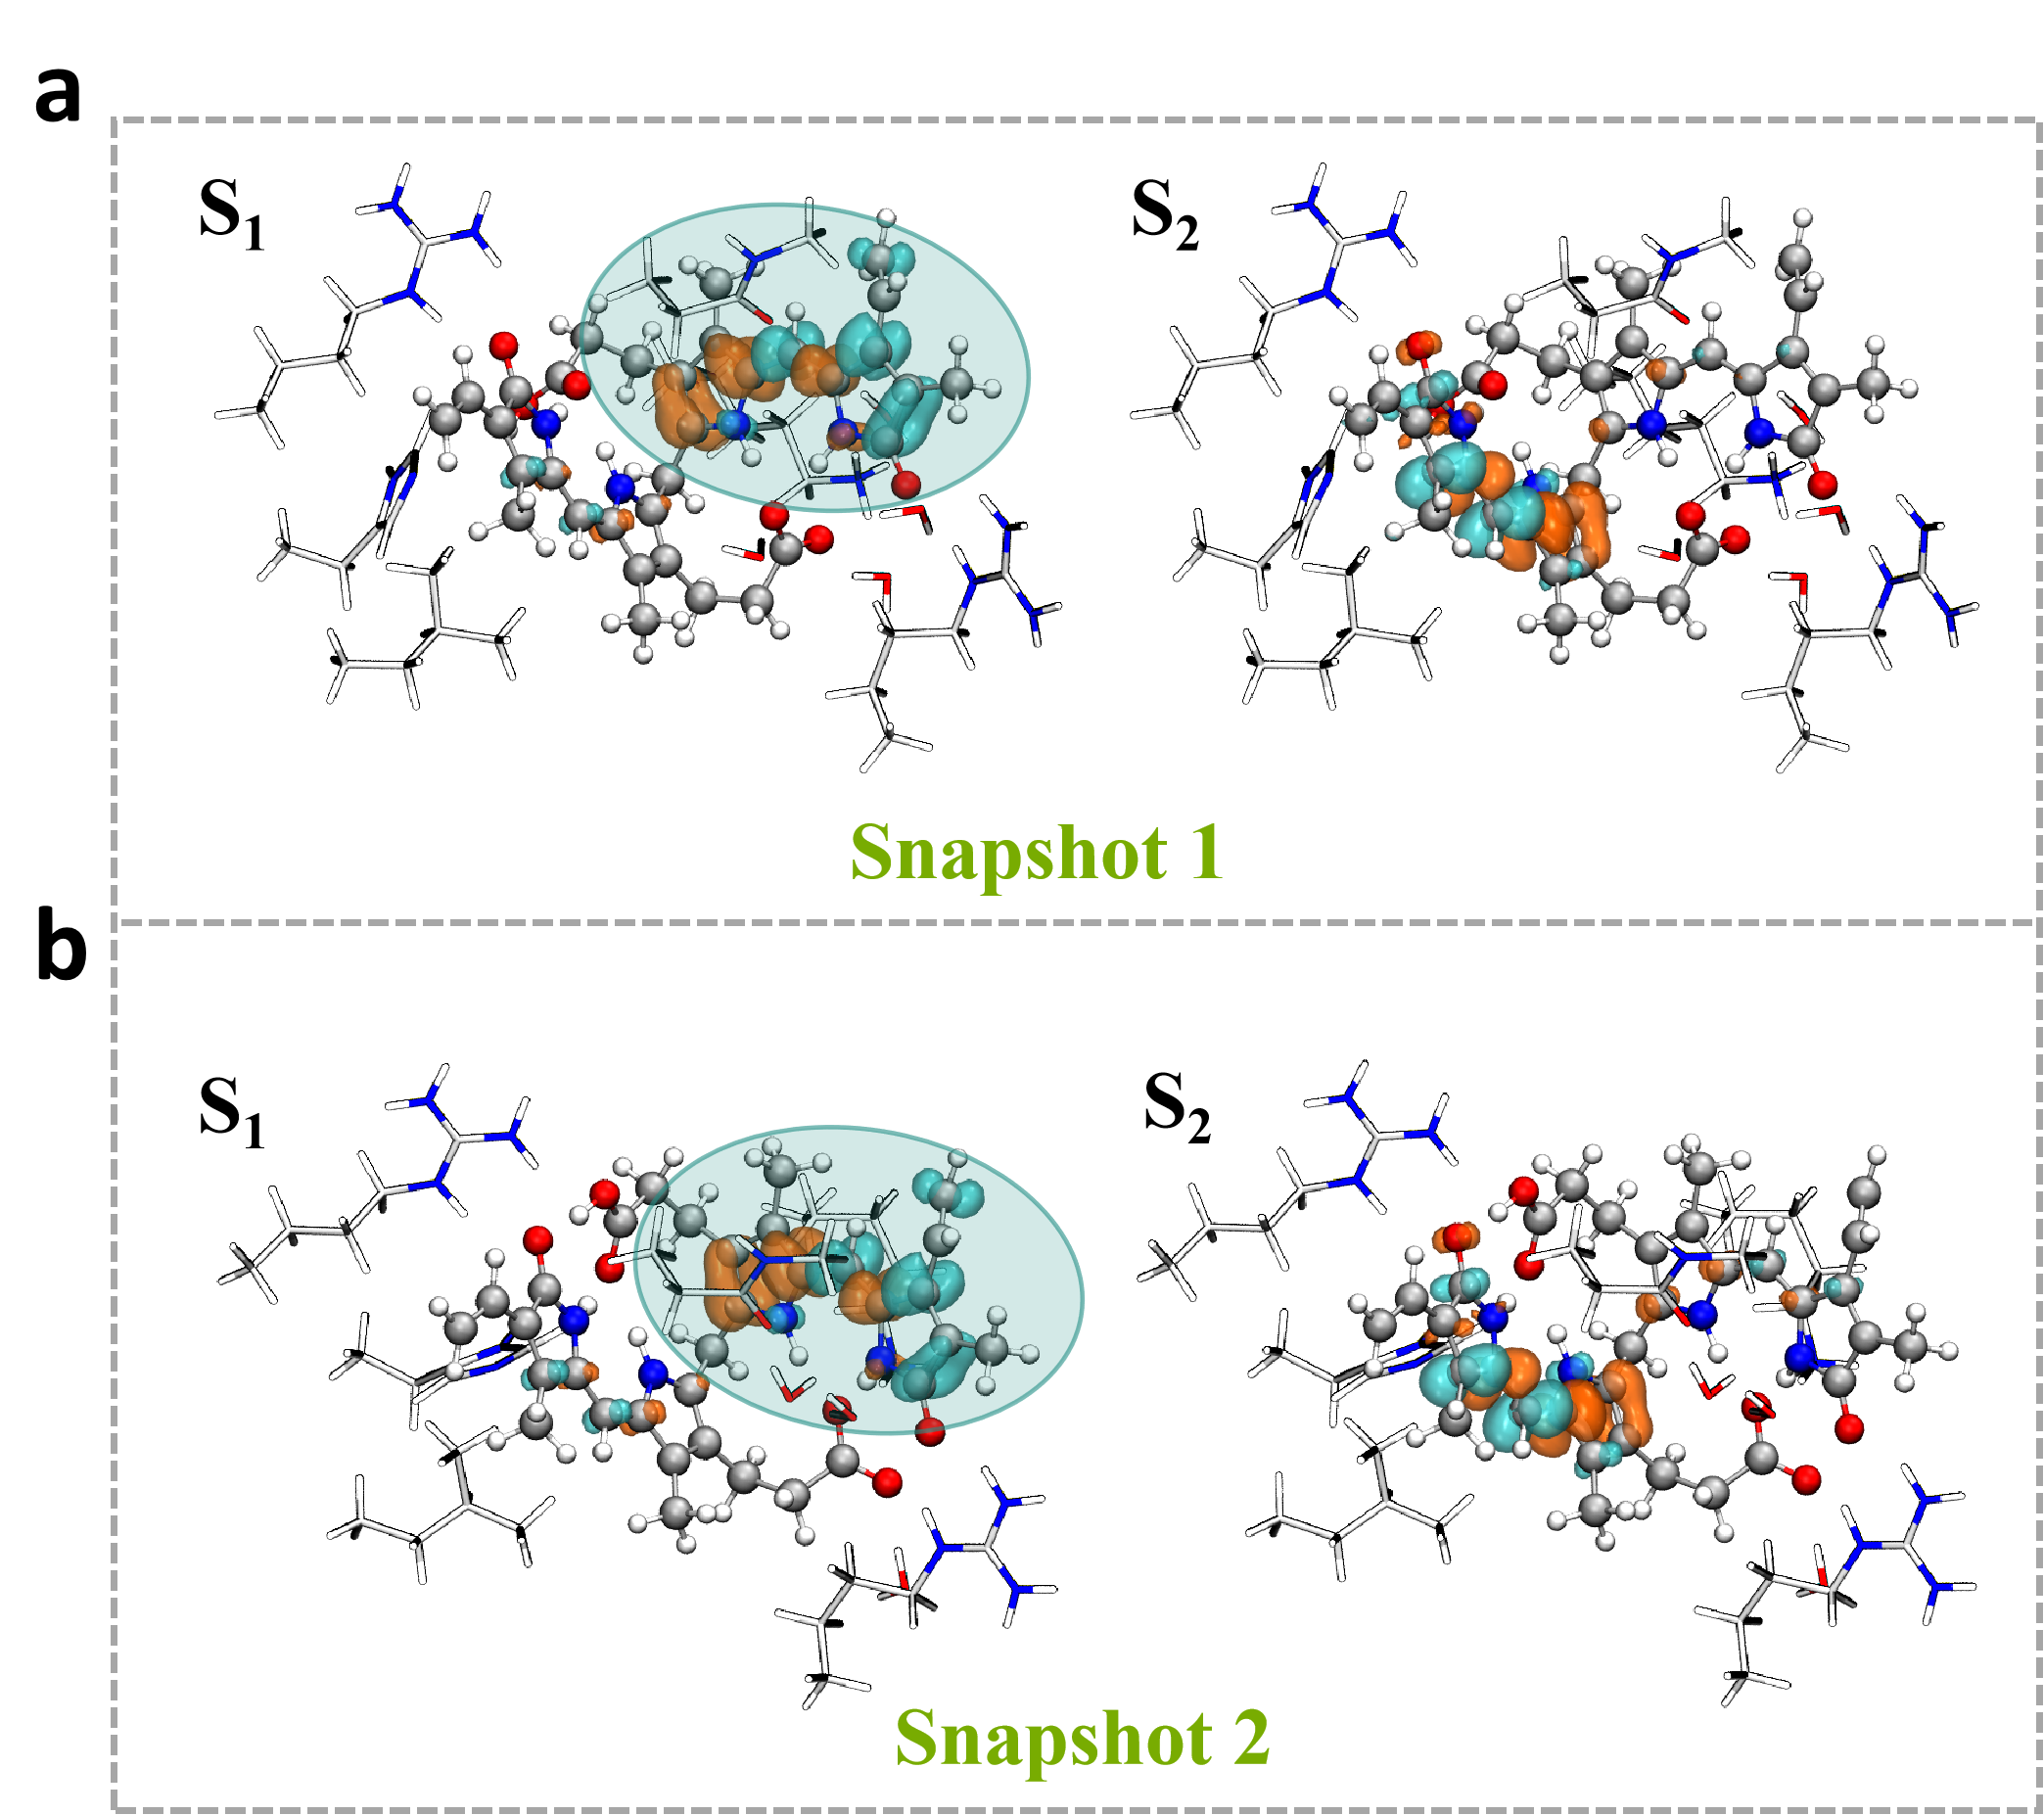
**

**Supplementary Fig. 15| Charge-density-difference analysis of BR in the HSA IIA sub-domain.** Charge-density-difference maps of the S1 and S2 excited states of BR in the HSA IIA binding pocket, calculated from representative structures extracted from two independent MD trajectories.The charge-density difference was evaluated relative to the ground-state electron density at the Franck-Condon geometry. Cyan isosurface indicates an increase in electron density, while orange isosurface indicates a decrease in electron density. The excited-state electron-density redistribution is concentrated around the AB moiety, with increased electron density near the B-ring nitrogen atoms. The cyan shaded region marks the AB dipyrrin one moiety of BR.


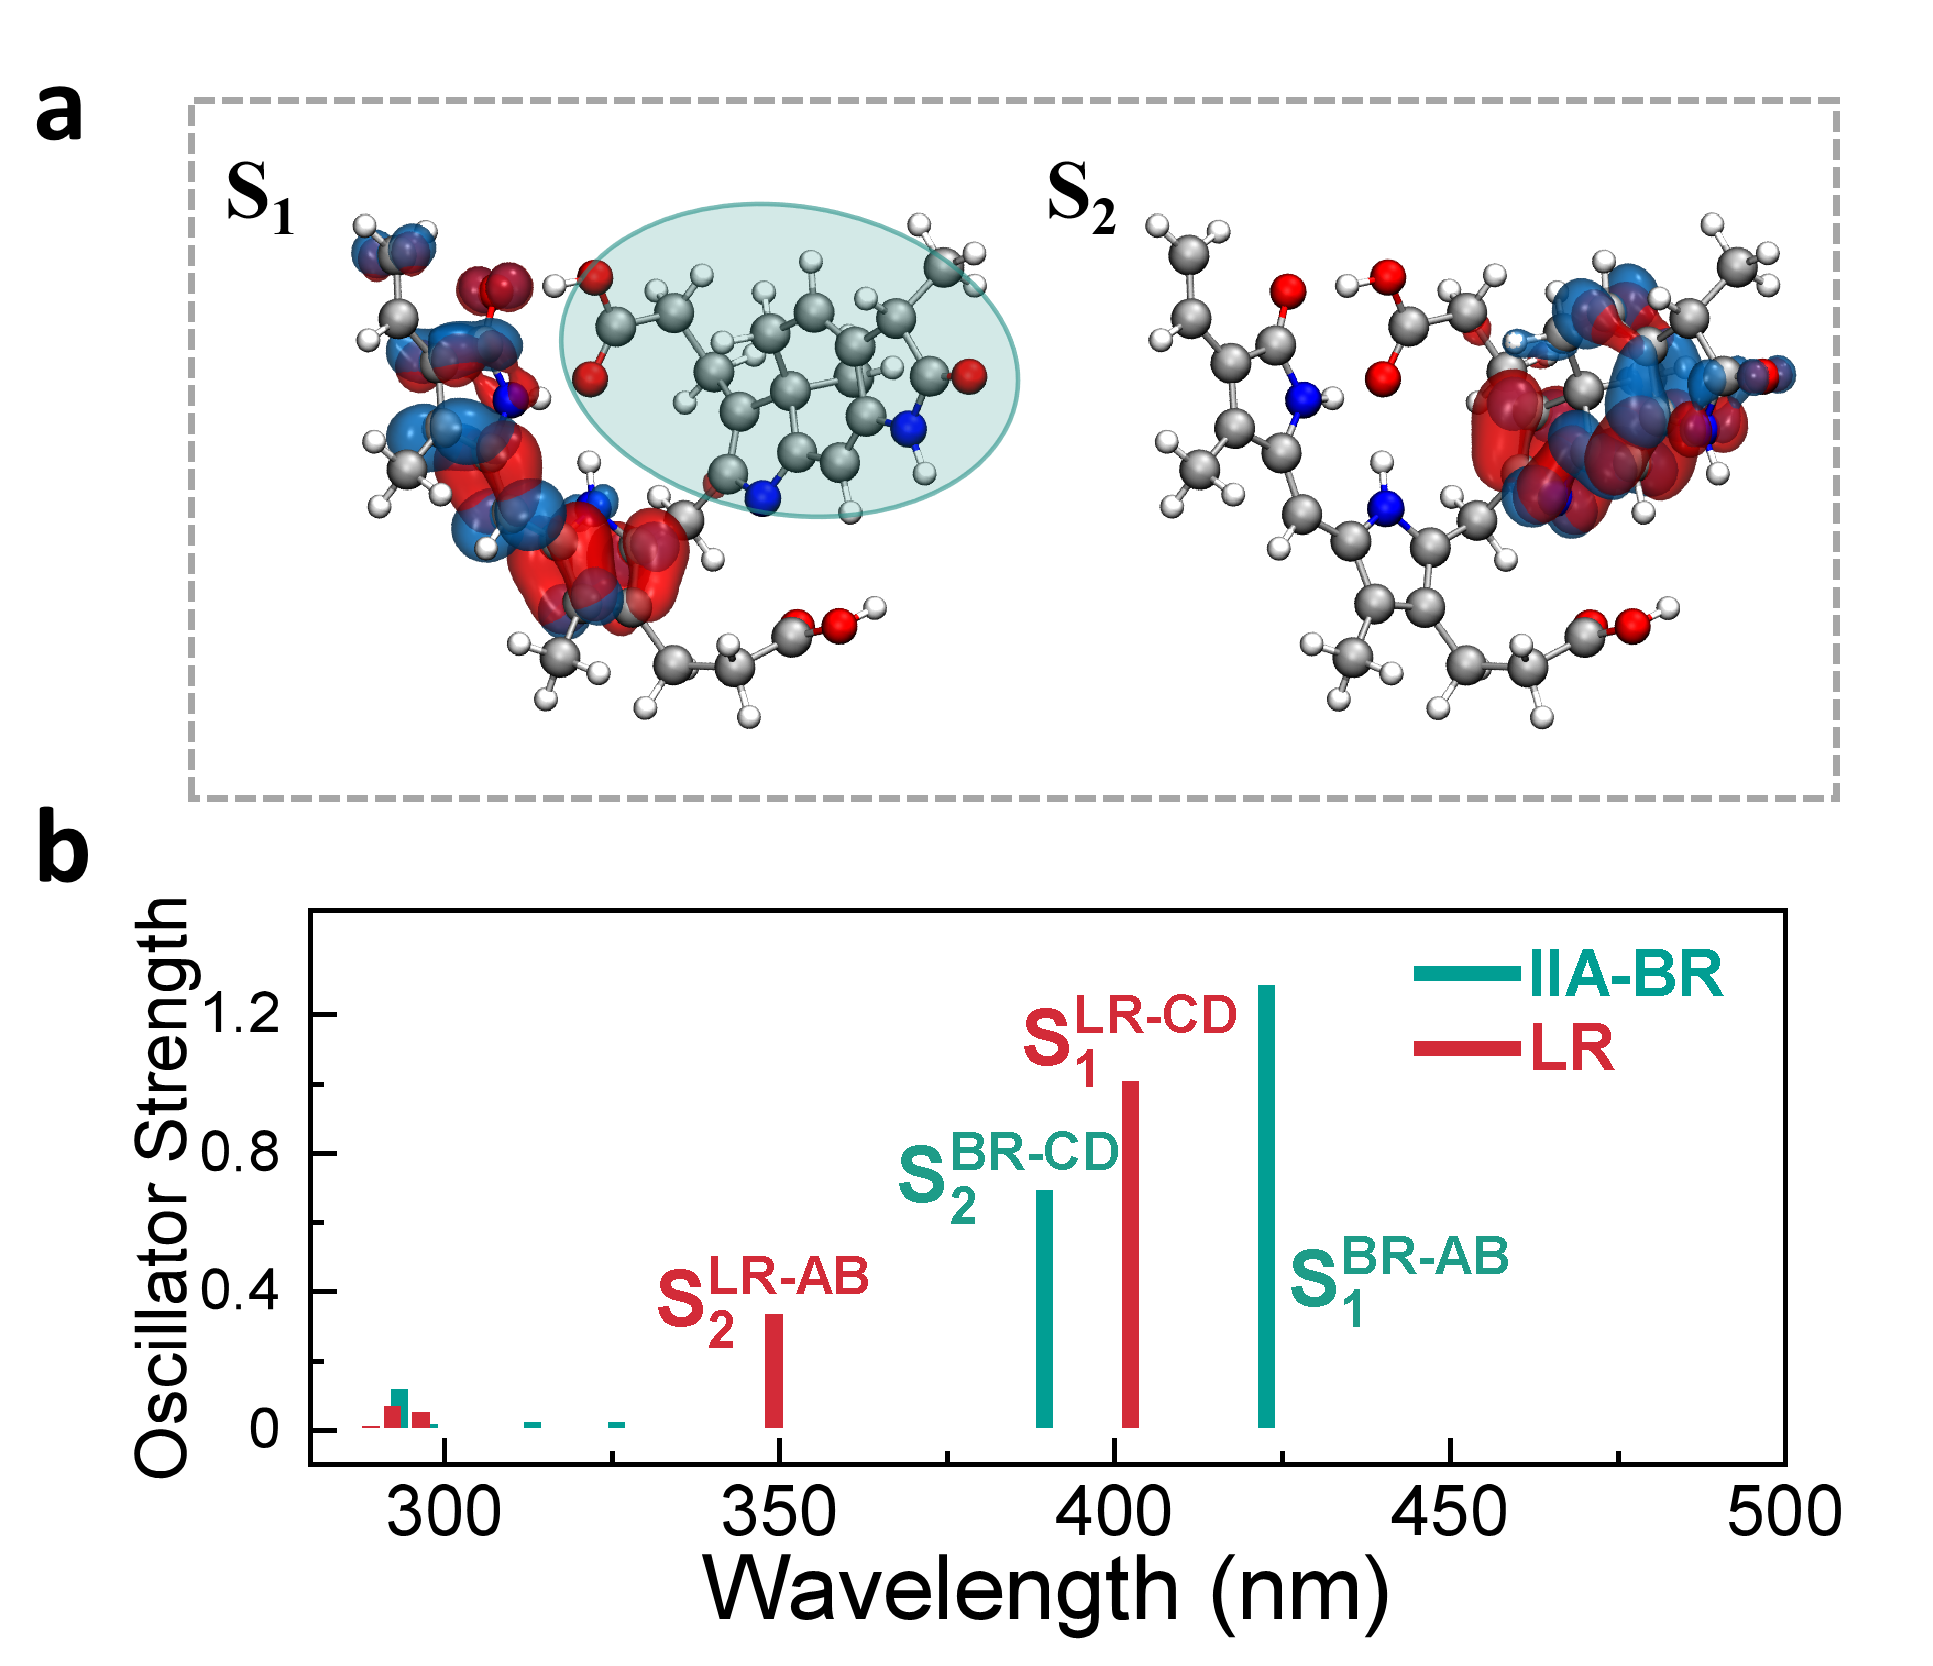


**Supplementary Fig. 16| Excited-state characteristics of lumirubin (LR). (a)** Electron-hole analysis of LR shows that it also possesses two localized exciton states. The lower-energy exciton state (S1) is mainly localized on the CD moiety, whereas the higher-energy exciton state (S2) is mainly distributed on the cyclized AB moiety. The cyan shaded region highlights the cyclized AB moiety of LR. **(b)** The vertical excitation energies and oscillator strengths of LR were calculated and compared with those of BR at the IIA site (at the same level of theory). The S1 and S2 states of LR lie at higher energies than the corresponding S1 and S2 states of BR at the IIA site, respectively, indicating that LR can be partially re‑excited by blue light after its formation.

**Table 5. The transition energies and oscillator strengths of the first six excited states of Lumirubin.**

|  |  | **Vertical excitation energy (Oscillator strength)** |
| --- | --- | --- |
| Lumirubin  (LR) | S1 | 3.08 eV, 402.55 nm (1.0065) |
| S2 | 3.55 eV, 349.25 nm (0.3291) |
| S3 | 4.18 eV, 296.61 nm (0.0443) |
| S4 | 4.24 eV, 292.42 nm (0.0643) |
| S5 | 4.29 eV, 289.01 nm (0.0060) |
| S6 | 4.59 eV, 270.12 nm (0.0753) |

**Section 5. FSRS Data Processing and Vibrational-Mode Analysis**

**
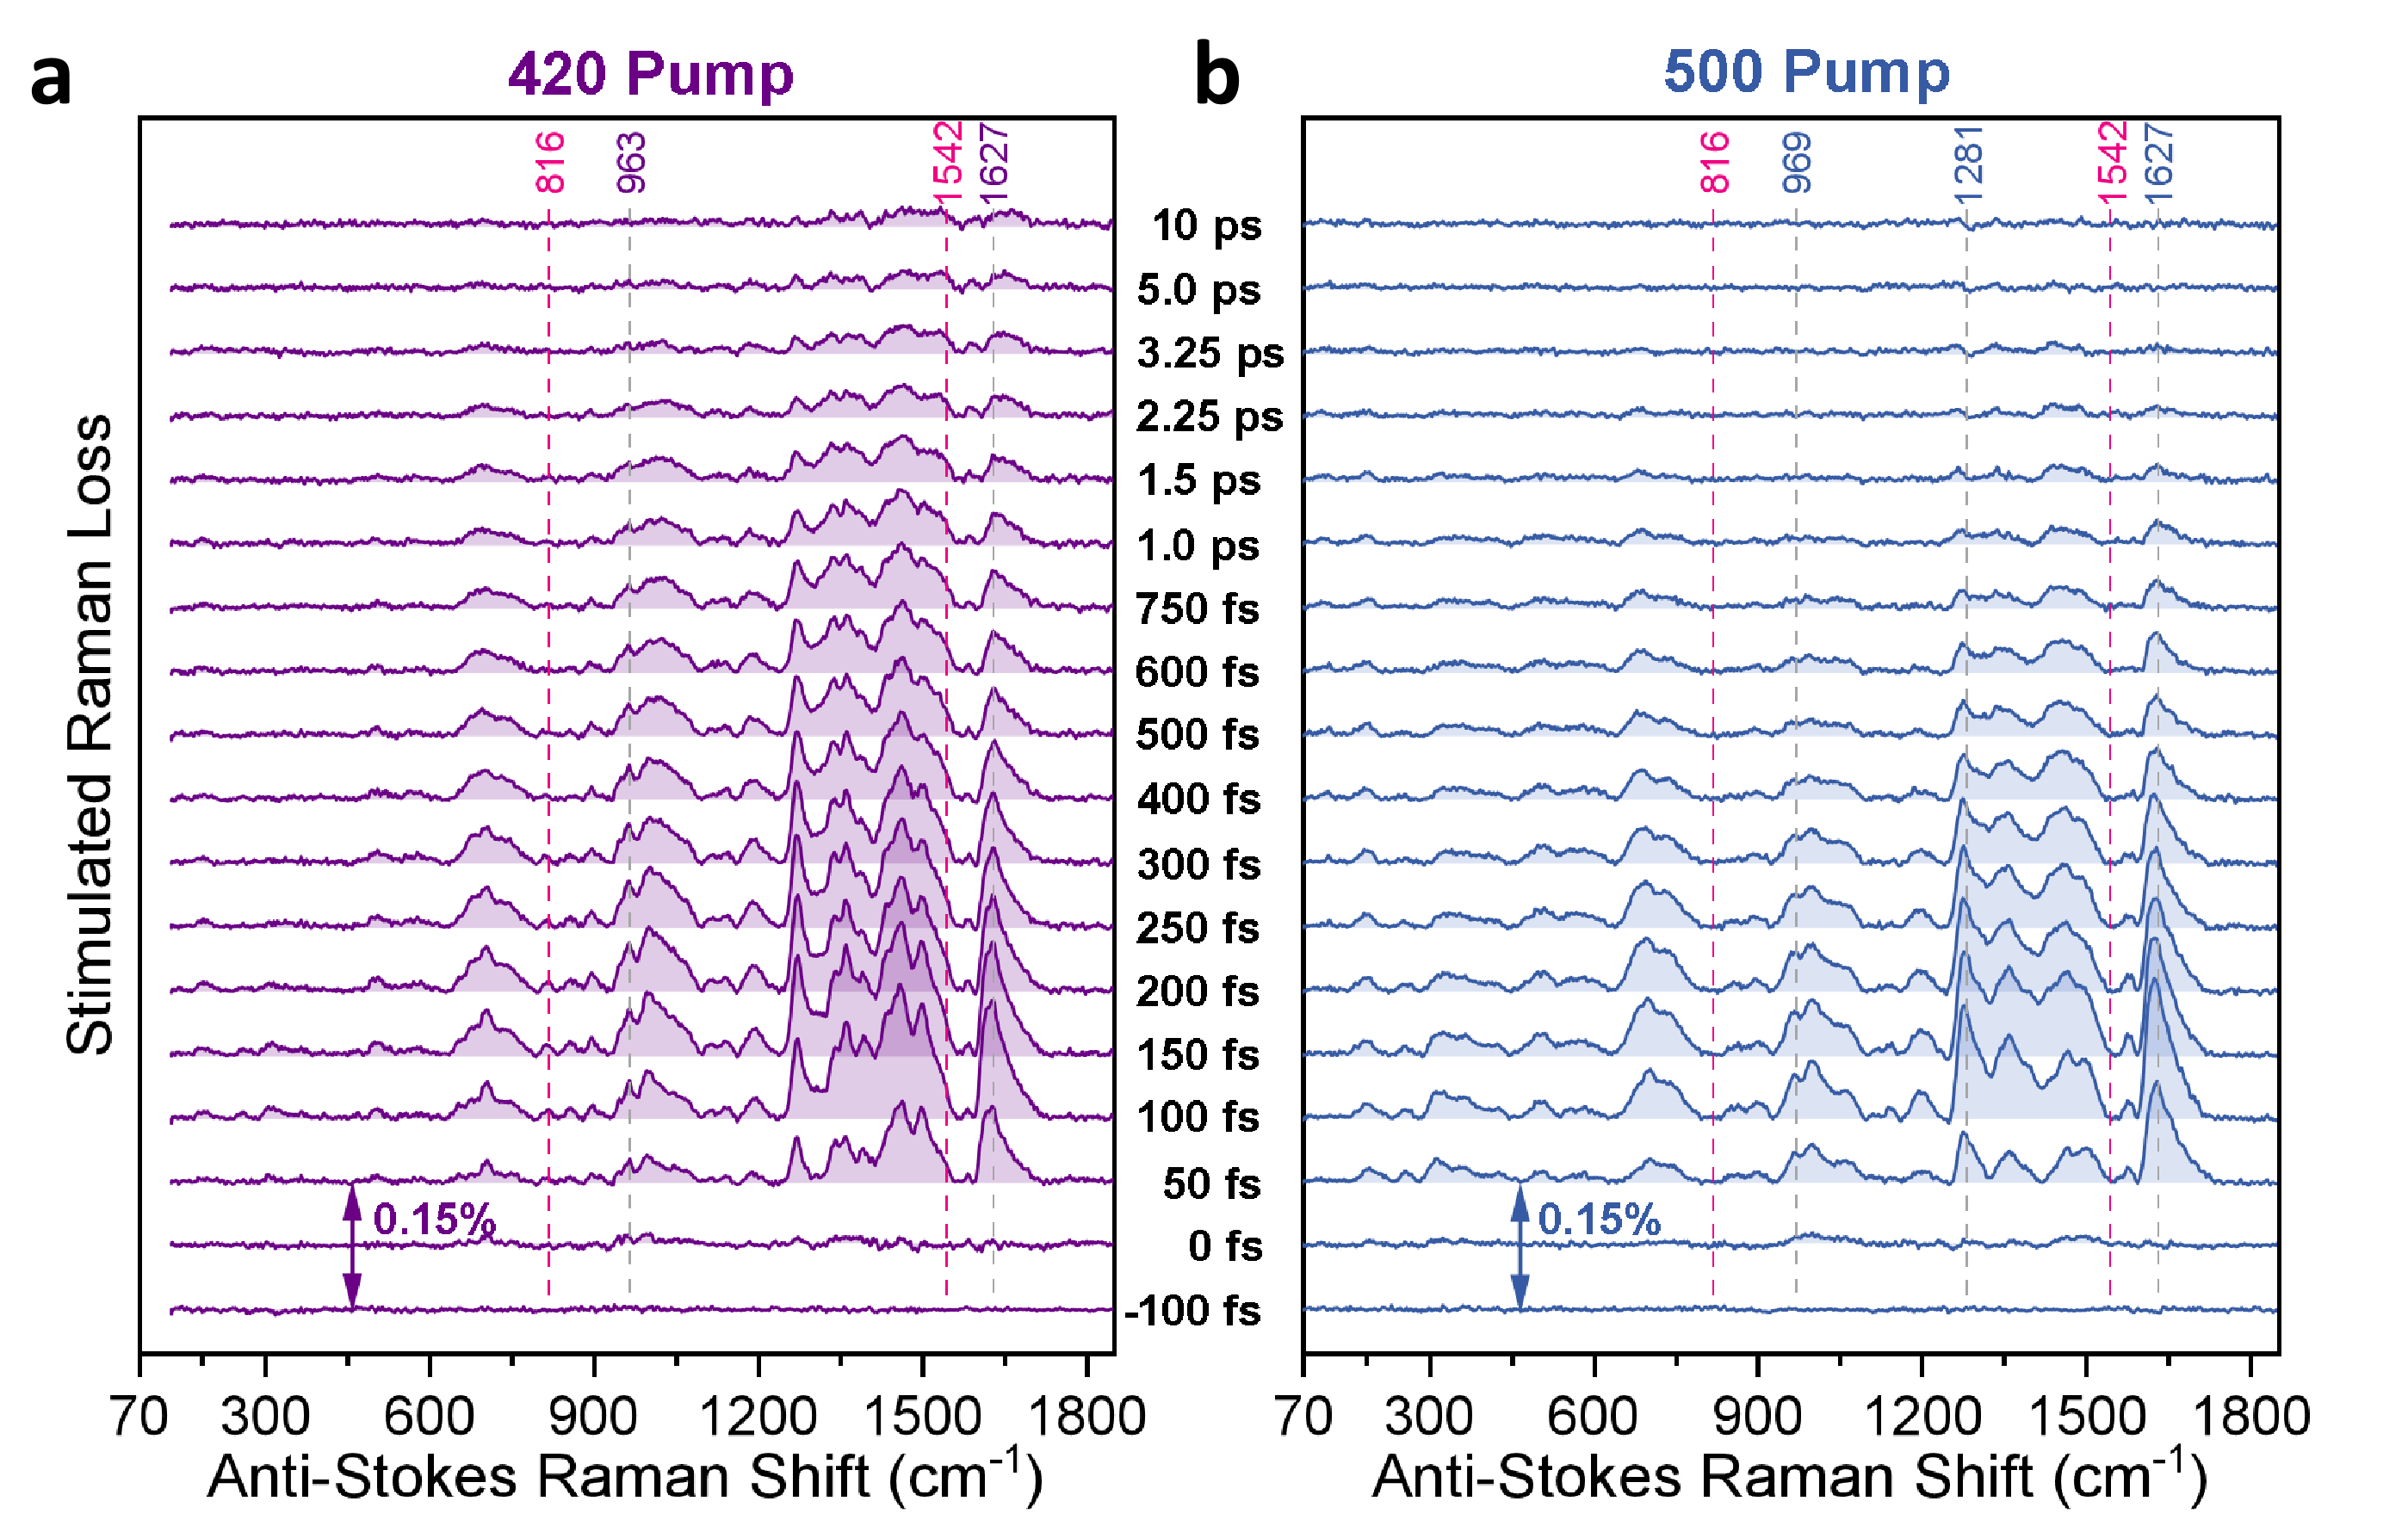
**

**Supplementary Fig. 17| Excitation-wavelength-dependent FSRS spectra of the BR-HSA complex in H₂O.** Time-resolved FSRS spectra of the BR-HSA complex in H₂O recorded over the 70-1850 cm⁻¹ region following (a), 420 nm and (b), 500 nm excitation. The excited-state vibrational signals persist for a longer time under 420 nm excitation than under 500 nm excitation, reflecting distinct relaxation dynamics of the two exciton pathways. Although most Raman bands involve coupled motions of both the AB and CD dipyrrinone moieties, the 816 and 1542 cm⁻¹ bands, marked by red dashed lines, are strongly enhanced under 420 nm excitation, supporting their assignment to CD-moiety-dominated vibrational modes.

**
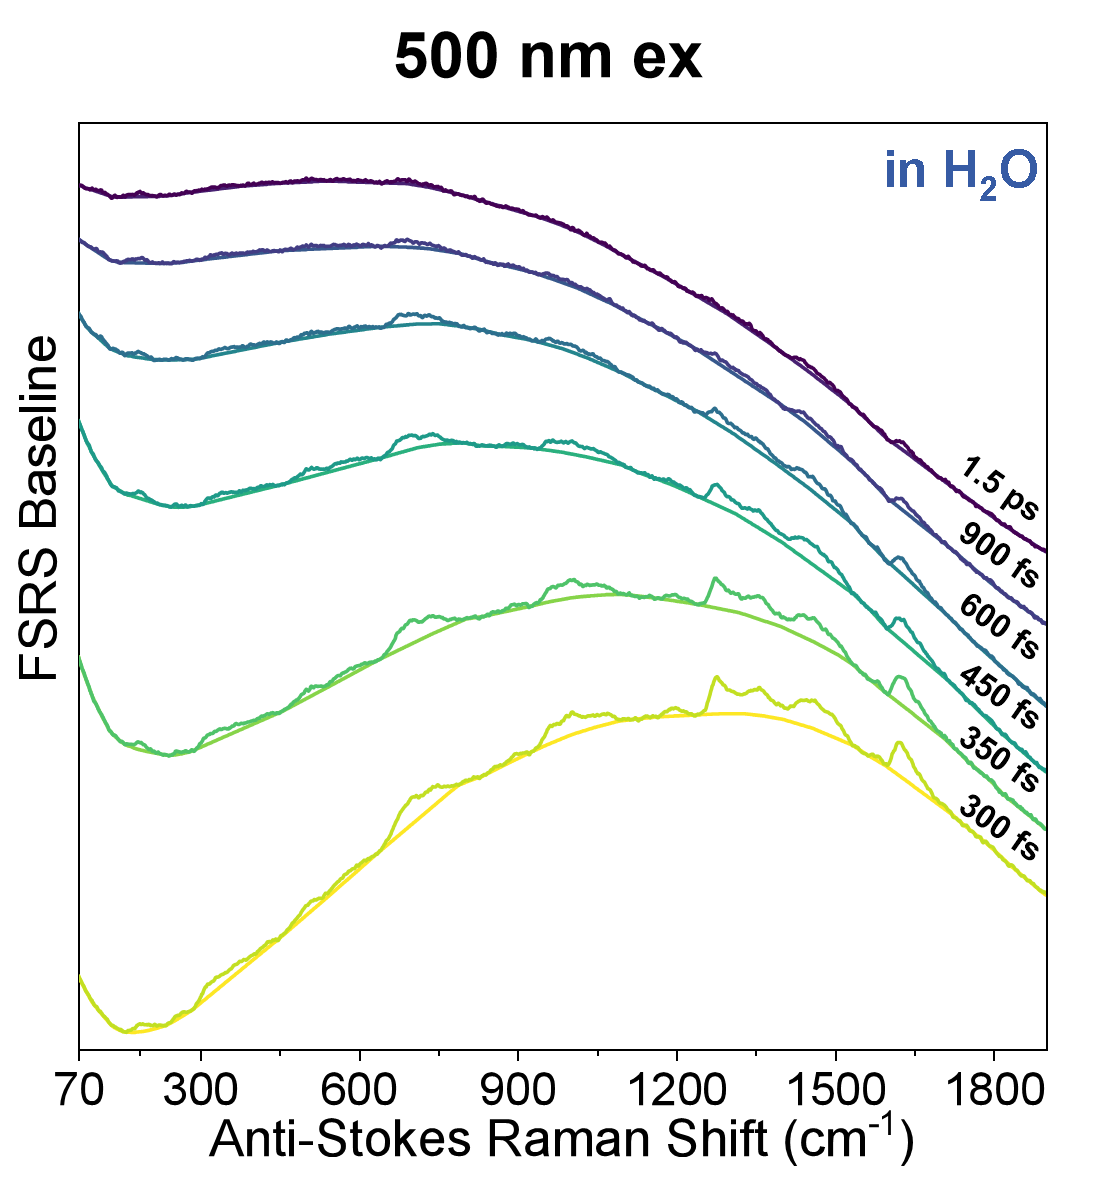
**

**Supplementary Fig. 18| baseline and the selected raw data of FSRS under 500 nm excitation in H2O.**

**
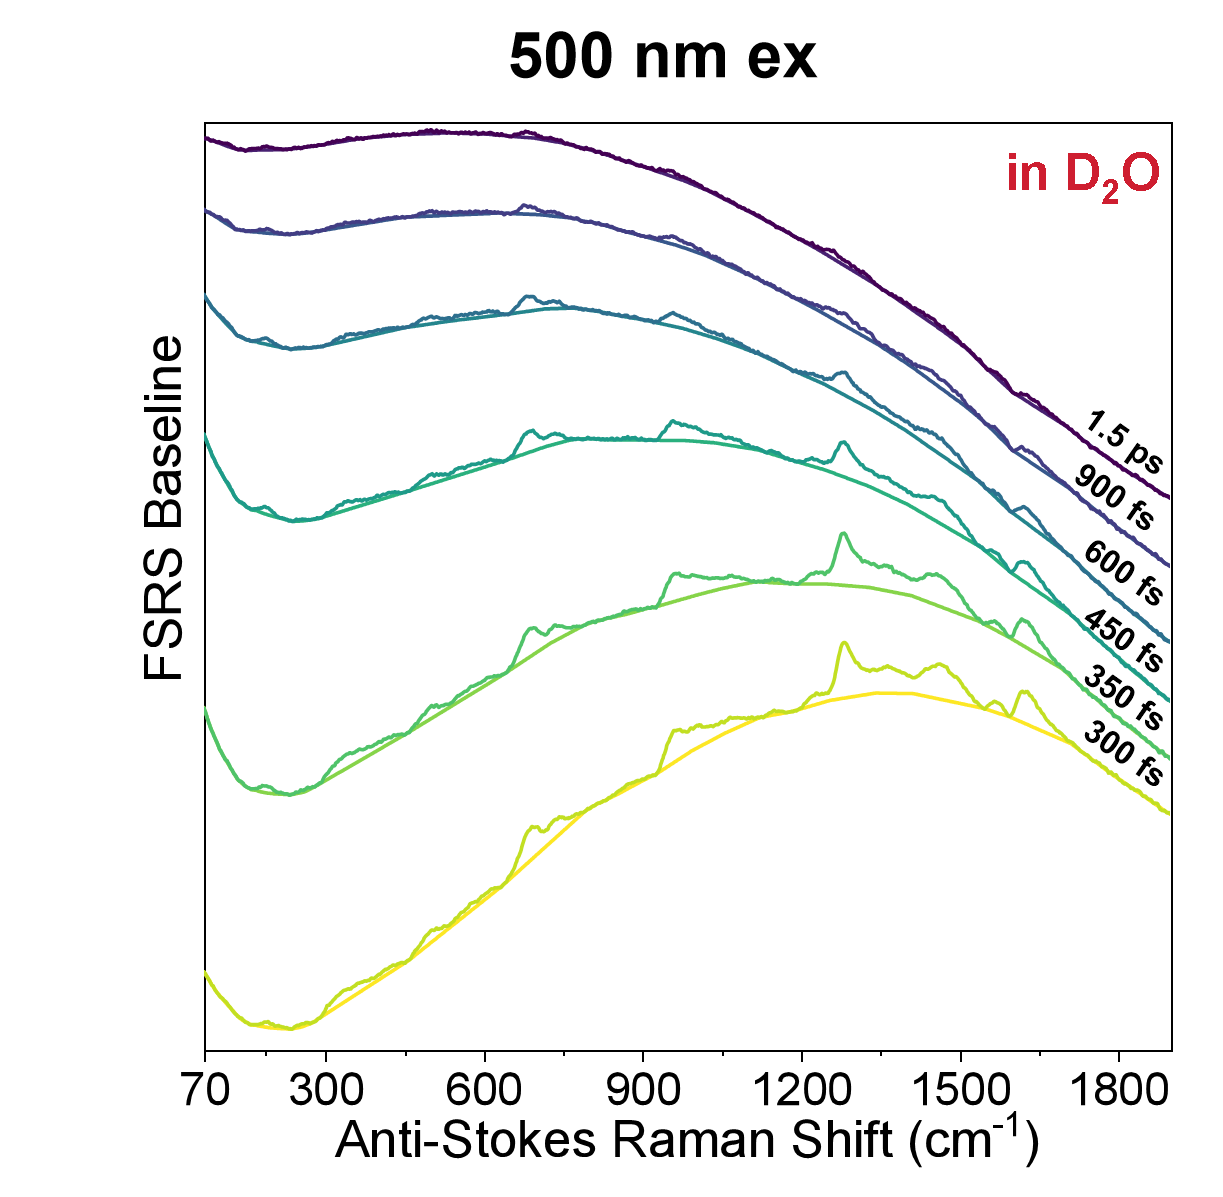
**

**Supplementary Fig. 19| baseline and the selected raw data of FSRS under 500 nm excitation in D2O.**

**
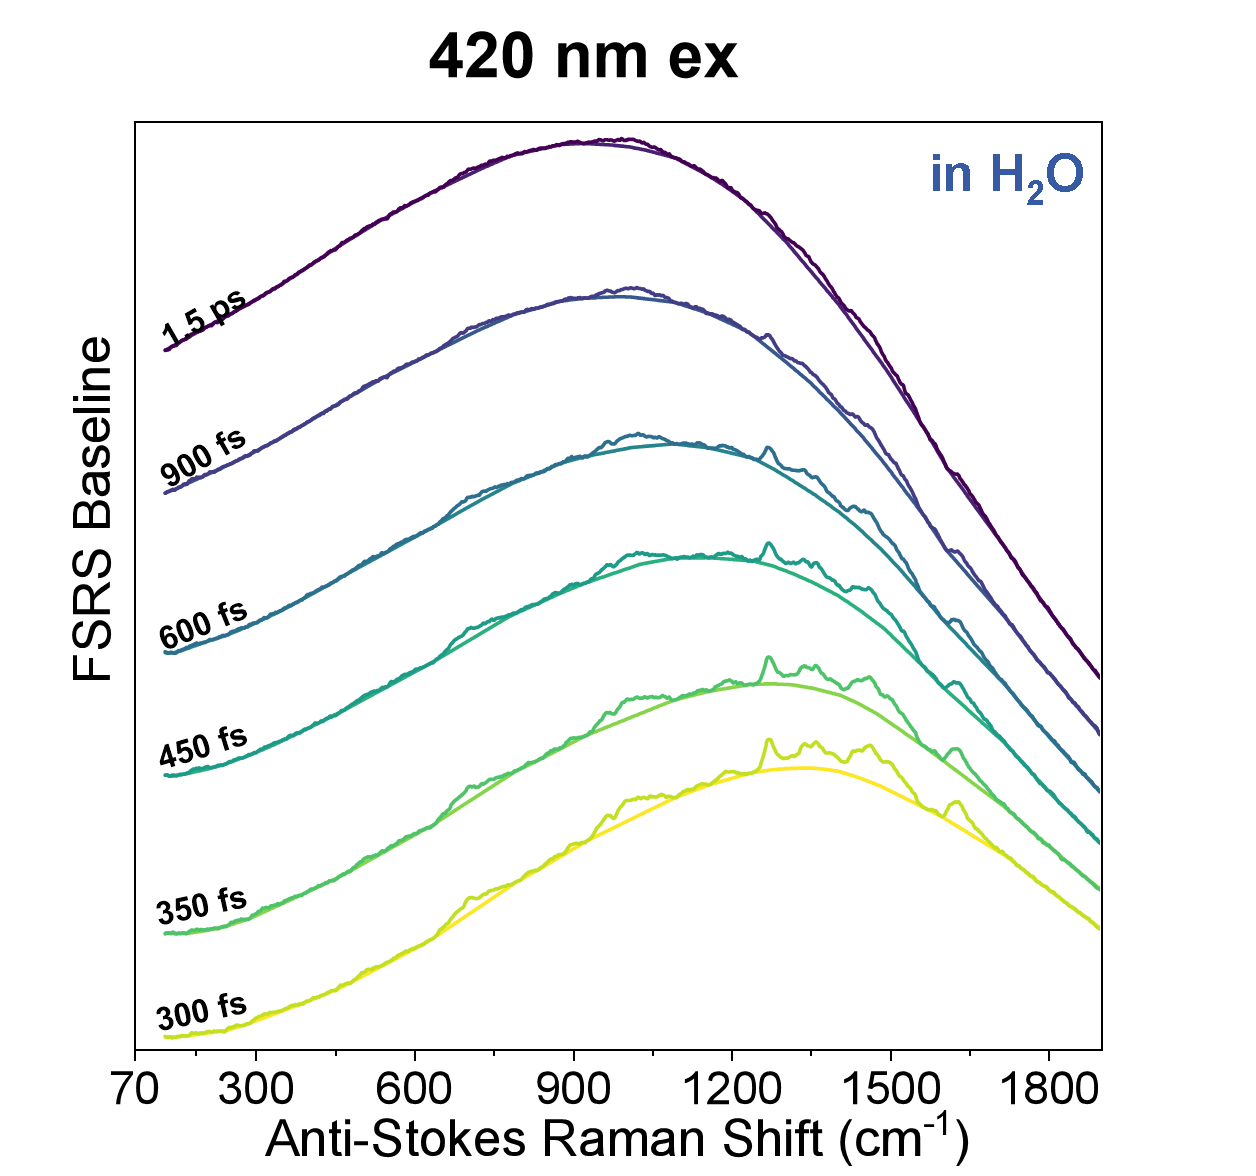
**

**Supplementary Fig. 20| baseline and the selected raw data of FSRS under 420 nm excitation in H2O.**

**
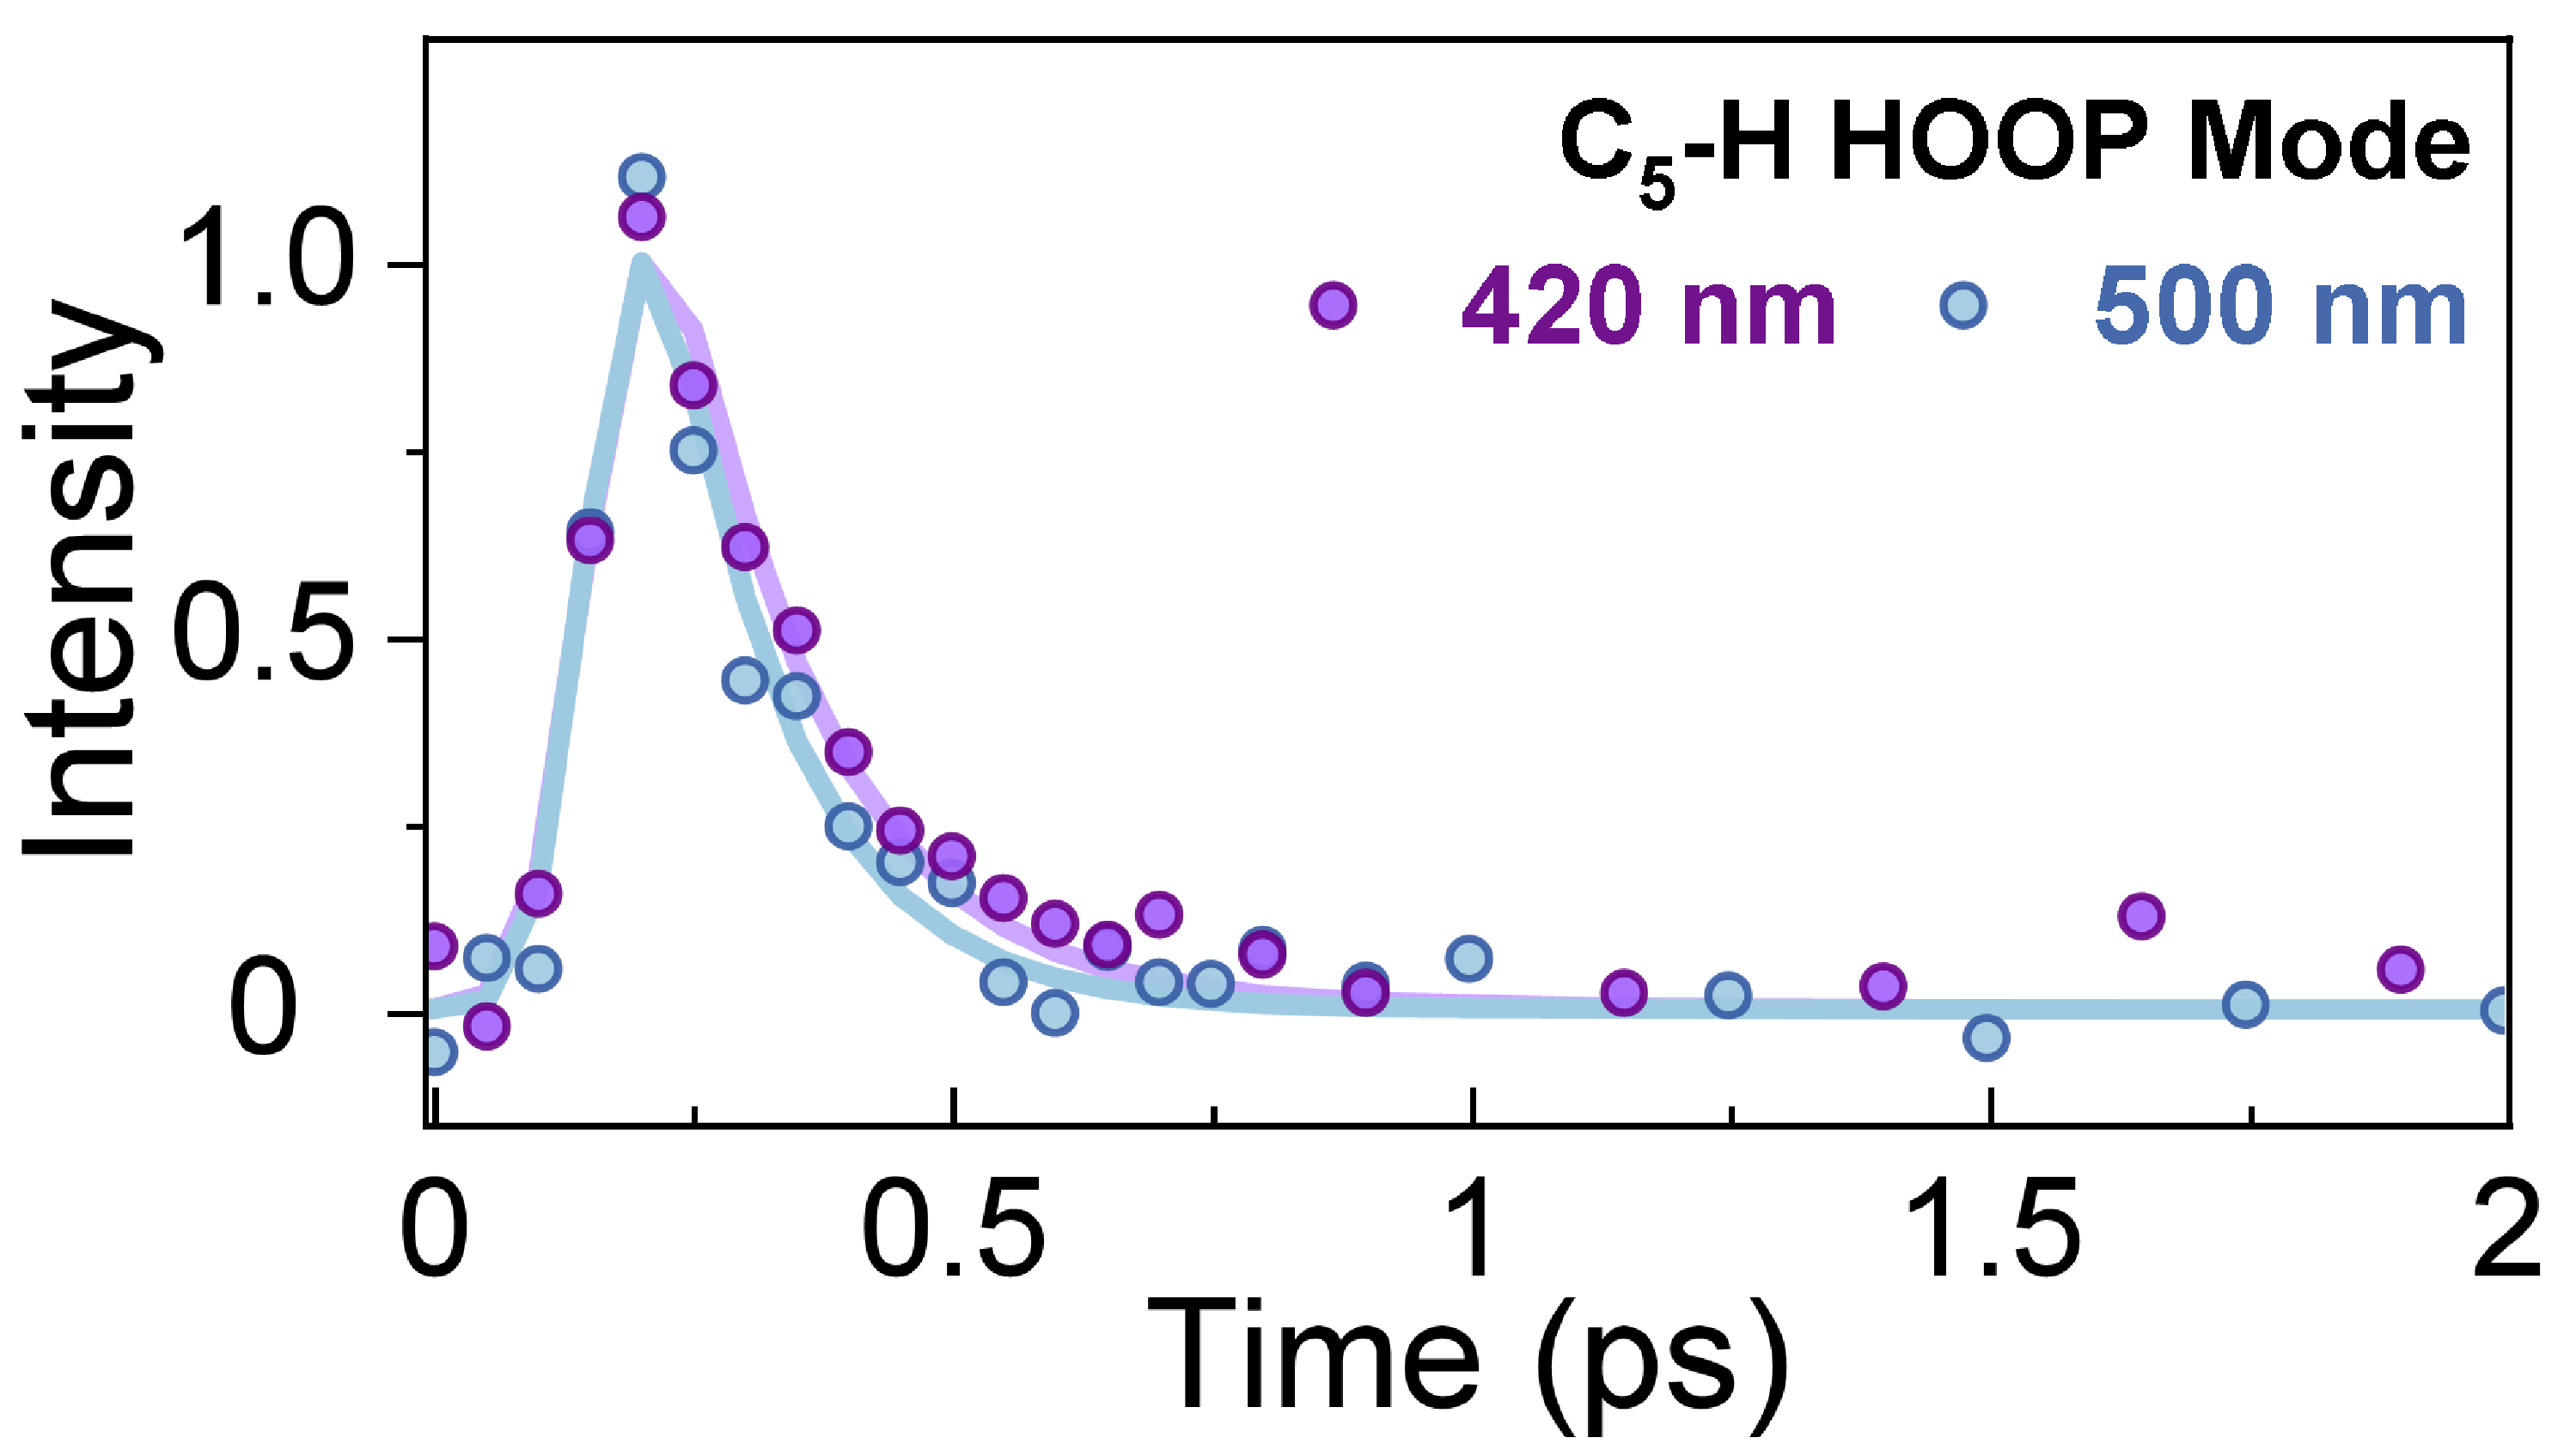
**

**Supplementary Fig. 21| Transient amplitude of the C5-H HOOP mode following 420 and 500 nm excitation.**

**Section 6. Atomic coordinates for TD-DFT calculation**

The table lists all atomic coordinates of the QM cluster models for the BR-HSA complex bound at the IIA and IB sites. For each site, the three snapshots are identical in the number and type of residues, and the difference in atom count among them arises solely from the number of water molecules surrounding BR.

**Table 6. Optimized ground-state atomic coordinates of the QM cluster model for the IIA site (including BR, water molecules, and residues truncated at Cα with methyl caps) derived from snapshot 1.**

| **Atomic number** | **Element** | **X** | **Y** | **Z** |
| --- | --- | --- | --- | --- |
| 1 | C | -6.959261 | -1.33408 | 4.232377 |
| 2 | C | -6.916325 | -0.497525 | 2.922207 |
| 3 | C | -7.822129 | 0.549543 | 2.586399 |
| 4 | C | -6.022023 | -0.843779 | 1.894726 |
| 5 | C | -7.671264 | 1.425049 | 1.48416 |
| 6 | C | -5.837159 | -0.026916 | 0.760852 |
| 7 | C | -6.658733 | 1.116263 | 0.539361 |
| 8 | O | -6.444076 | 2.028044 | -0.447939 |
| 9 | H | -6.138974 | -0.95242 | 4.834508 |
| 10 | H | -6.797467 | -2.381047 | 3.978055 |
| 11 | H | -8.565787 | 0.891147 | 3.303742 |
| 12 | H | -5.335785 | -1.66822 | 1.986383 |
| 13 | H | -8.249314 | 2.330431 | 1.472238 |
| 14 | H | -5.173752 | -0.318669 | -0.033569 |
| 15 | H | -5.933734 | 2.785968 | -0.162285 |
| 16 | C | -8.485899 | -5.348219 | 1.090567 |
| 17 | C | -7.128532 | -4.892294 | 1.707806 |
| 18 | C | -6.094259 | -5.934875 | 1.876055 |
| 19 | C | -5.771084 | -6.701244 | 0.52834 |
| 20 | O | -5.840331 | -6.057609 | -0.531631 |
| 21 | O | -5.317832 | -7.881051 | 0.580463 |
| 22 | H | -8.304364 | -5.73407 | 0.109209 |
| 23 | H | -6.693416 | -4.206593 | 0.978362 |
| 24 | H | -7.274488 | -4.454209 | 2.697997 |
| 25 | H | -5.191935 | -5.466681 | 2.253955 |
| 26 | H | -6.445034 | -6.720157 | 2.545747 |
| 27 | C | 0.641029 | 0.517058 | 7.254584 |
| 28 | C | 1.795172 | 1.382194 | 6.86279 |
| 29 | C | 2.832806 | 0.564427 | 5.991642 |
| 30 | C | 3.926602 | 1.586573 | 5.540819 |
| 31 | N | 5.152241 | 0.865497 | 5.063979 |
| 32 | H | 1.091598 | -0.425149 | 7.564653 |
| 33 | H | 0.151188 | 0.226317 | 6.326343 |
| 34 | H | 1.328519 | 2.152816 | 6.24694 |
| 35 | H | 2.283518 | 1.753295 | 7.760398 |
| 36 | H | 3.275667 | -0.252131 | 6.553421 |
| 37 | H | 2.404204 | 0.185852 | 5.051918 |
| 38 | H | 3.480191 | 2.208117 | 4.761897 |
| 39 | H | 4.055275 | 2.22701 | 6.412449 |
| 40 | H | 5.759829 | 1.545853 | 4.606628 |
| 41 | H | 5.619408 | 0.538728 | 5.901549 |
| 42 | H | 4.931854 | 0.119028 | 4.418666 |
| 43 | C | 7.755068 | 4.321354 | 0.080951 |
| 44 | C | 7.753354 | 2.754422 | 0.040656 |
| 45 | C | 9.175954 | 2.196296 | 0.4032 |
| 46 | N | 9.216343 | 0.71472 | 0.331239 |
| 47 | C | 9.947314 | -0.034064 | -0.452684 |
| 48 | N | 11.002369 | 0.471578 | -1.061356 |
| 49 | N | 9.618654 | -1.298538 | -0.754011 |
| 50 | H | 7.991867 | 4.642555 | 1.098279 |
| 51 | H | 6.822968 | 4.830404 | -0.163501 |
| 52 | H | 7.064597 | 2.412915 | 0.807458 |
| 53 | H | 7.512204 | 2.378071 | -0.961196 |
| 54 | H | 9.950106 | 2.674161 | -0.202537 |
| 55 | H | 9.406027 | 2.44307 | 1.431316 |
| 56 | H | 8.450934 | 0.239538 | 0.797718 |
| 57 | H | 11.364194 | 1.311981 | -0.614025 |
| 58 | H | 11.591221 | -0.145981 | -1.590858 |
| 59 | H | 8.743967 | -1.684953 | -0.42582 |
| 60 | H | 10.044104 | -1.75955 | -1.540705 |
| 61 | C | 8.815819 | 0.495752 | -4.129485 |
| 62 | C | 8.132573 | -0.848708 | -4.473294 |
| 63 | C | 6.801567 | -0.837621 | -3.716194 |
| 64 | N | 6.113404 | -2.125448 | -3.614056 |
| 65 | C | 4.892254 | -2.37241 | -3.170553 |
| 66 | N | 4.041617 | -1.465857 | -2.712297 |
| 67 | N | 4.566166 | -3.612404 | -2.983488 |
| 68 | H | 8.949257 | 0.672315 | -3.062189 |
| 69 | H | 8.227576 | 1.306599 | -4.55221 |
| 70 | H | 8.03115 | -0.986143 | -5.547224 |
| 71 | H | 8.703623 | -1.704478 | -4.112101 |
| 72 | H | 7.062548 | -0.355099 | -2.776268 |
| 73 | H | 6.11286 | -0.201035 | -4.264776 |
| 74 | H | 6.711947 | -2.900148 | -3.847904 |
| 75 | H | 4.451672 | -0.542279 | -2.626754 |
| 76 | H | 3.199002 | -1.647187 | -2.180286 |
| 77 | H | 5.222118 | -4.310723 | -3.303765 |
| 78 | H | 3.816194 | -3.763805 | -2.32537 |
| 79 | C | -3.247333 | 7.190913 | -3.694879 |
| 80 | C | -2.894088 | 6.416045 | -2.415308 |
| 81 | C | -3.553241 | 5.060687 | -2.390619 |
| 82 | C | -1.396021 | 6.076284 | -2.345327 |
| 83 | H | -2.908665 | 6.674739 | -4.592525 |
| 84 | H | -2.63706 | 8.105669 | -3.675154 |
| 85 | H | -3.255039 | 6.939615 | -1.53634 |
| 86 | H | -3.417948 | 4.634302 | -1.403693 |
| 87 | H | -4.607608 | 5.284862 | -2.553814 |
| 88 | H | -3.318173 | 4.357022 | -3.190682 |
| 89 | H | -1.14629 | 5.388424 | -1.534283 |
| 90 | H | -1.101867 | 5.678024 | -3.319881 |
| 91 | H | -0.726931 | 6.91622 | -2.136283 |
| 92 | C | -7.557893 | 7.246697 | 1.759226 |
| 93 | C | -6.106908 | 7.232744 | 2.046539 |
| 94 | C | -5.572634 | 5.802128 | 1.854468 |
| 95 | C | -5.26202 | 5.255692 | 0.673102 |
| 96 | N | -5.728101 | 4.796336 | 2.814213 |
| 97 | C | -5.411014 | 3.70901 | 2.181934 |
| 98 | N | -5.149297 | 3.893012 | 0.882378 |
| 99 | H | -8.071089 | 6.652035 | 2.485798 |
| 100 | H | -5.584206 | 8.00067 | 1.486116 |
| 101 | H | -5.973764 | 7.499318 | 3.085582 |
| 102 | H | -5.991829 | 4.94355 | 3.781517 |
| 103 | H | -5.133692 | 5.860652 | -0.204198 |
| 104 | H | -5.39377 | 2.749756 | 2.69704 |
| 105 | C | -8.900528 | 0.914906 | -4.110352 |
| 106 | C | -7.595254 | 0.181288 | -3.902107 |
| 107 | C | -7.716302 | -0.733796 | -2.738672 |
| 108 | N | -6.614017 | -1.684839 | -2.470248 |
| 109 | C | -6.715214 | -2.963905 | -2.198059 |
| 110 | N | -7.788164 | -3.669911 | -2.45047 |
| 111 | N | -5.684279 | -3.557401 | -1.703336 |
| 112 | H | -9.021205 | 1.553664 | -3.231475 |
| 113 | H | -9.76539 | 0.243834 | -4.147462 |
| 114 | H | -7.381424 | -0.342762 | -4.830627 |
| 115 | H | -6.757178 | 0.865763 | -3.779541 |
| 116 | H | -7.89775 | -0.157498 | -1.828097 |
| 117 | H | -8.649144 | -1.289186 | -2.87375 |
| 118 | H | -5.709992 | -1.27012 | -2.341515 |
| 119 | H | -8.488603 | -3.384862 | -3.124291 |
| 120 | H | -7.829051 | -4.662684 | -2.232683 |
| 121 | H | -4.858629 | -2.982442 | -1.593274 |
| 122 | H | -5.740016 | -4.545245 | -1.498011 |
| 123 | C | -0.00115 | -3.902956 | -2.725402 |
| 124 | C | 1.238333 | -4.778695 | -2.286132 |
| 125 | O | 2.14321 | -4.287775 | -1.581006 |
| 126 | C | -1.08087 | -4.087605 | -1.638845 |
| 127 | H | 0.282129 | -2.873098 | -2.789011 |
| 128 | H | -1.492279 | -5.094278 | -1.723414 |
| 129 | H | -0.7223 | -3.968323 | -0.621889 |
| 130 | H | -1.855065 | -3.327049 | -1.763254 |
| 131 | N | 1.341381 | -6.04884 | -2.783642 |
| 132 | C | 2.403488 | -7.001727 | -2.404252 |
| 133 | H | 0.555484 | -6.474358 | -3.267482 |
| 134 | H | 2.579346 | -6.93888 | -1.350675 |
| 135 | C | 2.825082 | 4.003735 | 0.793832 |
| 136 | C | -4.077128 | -0.45817 | -4.917134 |
| 137 | C | 4.433658 | -5.216519 | 1.049386 |
| 138 | C | -1.079381 | -0.209166 | 3.867199 |
| 139 | N | -0.022312 | 1.840572 | -0.068168 |
| 140 | C | 4.214664 | 3.428184 | 0.465759 |
| 141 | C | -4.327312 | -0.076894 | -6.181899 |
| 142 | C | 3.899909 | -5.670047 | 2.191438 |
| 143 | C | -2.420865 | -0.506735 | 3.164298 |
| 144 | N | -2.22153 | 0.406753 | -1.905583 |
| 145 | O | -3.929458 | -1.131484 | -2.001237 |
| 146 | C | 4.385221 | 2.009451 | 0.956064 |
| 147 | C | -2.572408 | 0.334102 | 1.940859 |
| 148 | N | 1.996431 | -0.272707 | 1.831192 |
| 149 | C | 0.846865 | 1.887986 | 2.262434 |
| 150 | C | -0.539313 | 2.133172 | -2.49738 |
| 151 | C | 2.76875 | -2.654235 | 1.663937 |
| 152 | C | 1.884923 | 4.137898 | -2.237675 |
| 153 | C | -1.800516 | 1.825881 | -5.312064 |
| 154 | C | 7.068027 | -4.227337 | -0.406894 |
| 155 | C | 0.151966 | -3.089197 | 3.346641 |
| 156 | C | 0.854791 | 2.340352 | 0.836333 |
| 157 | C | -1.573935 | 1.280332 | -2.773833 |
| 158 | C | 5.913197 | -1.96314 | 0.042741 |
| 159 | C | 1.873113 | -1.624017 | 2.080413 |
| 160 | O | 5.00175 | 1.787379 | 2.024637 |
| 161 | O | -3.238226 | 1.455317 | 2.134972 |
| 162 | C | 1.681105 | 3.258277 | 0.187381 |
| 163 | C | -2.19156 | 1.098824 | -4.076604 |
| 164 | C | 5.927081 | -3.430192 | 0.106702 |
| 165 | C | 0.709111 | -1.798192 | 2.851509 |
| 166 | O | 3.861657 | 1.082188 | 0.268944 |
| 167 | O | -2.060753 | 0.037229 | 0.87381 |
| 168 | C | 1.266272 | 3.30543 | -1.166835 |
| 169 | C | -3.174924 | 0.137676 | -3.95332 |
| 170 | C | 4.784597 | -3.832599 | 0.741005 |
| 171 | C | 0.150539 | -0.511543 | 3.070032 |
| 172 | C | 0.189943 | 2.403977 | -1.307983 |
| 173 | C | -3.189444 | -0.298859 | -2.549524 |
| 174 | C | 3.990958 | -2.639036 | 1.054303 |
| 175 | C | 0.971997 | 0.404875 | 2.410662 |
| 176 | N | 4.734822 | -1.550594 | 0.612484 |
| 177 | O | 6.783918 | -1.223099 | -0.416909 |
| 178 | H | -0.731137 | 1.153123 | 0.178365 |
| 179 | H | 2.811408 | 5.049172 | 0.446086 |
| 180 | H | 2.708634 | 4.051394 | 1.887869 |
| 181 | H | -4.621541 | -1.325994 | -4.527055 |
| 182 | H | 4.683373 | -5.942821 | 0.266697 |
| 183 | H | -1.0705 | -0.808206 | 4.790804 |
| 184 | H | -1.074078 | 0.84202 | 4.193629 |
| 185 | H | -2.117406 | 0.327592 | -0.8941 |
| 186 | H | 4.98058 | 4.063621 | 0.928347 |
| 187 | H | 4.369823 | 3.432612 | -0.623504 |
| 188 | H | -5.041483 | -0.636604 | -6.790891 |
| 189 | H | -3.85849 | 0.791948 | -6.646852 |
| 190 | H | 3.683012 | -5.010599 | 3.036213 |
| 191 | H | 3.691593 | -6.734512 | 2.324222 |
| 192 | H | -3.252264 | -0.314134 | 3.855477 |
| 193 | H | -2.453056 | -1.558438 | 2.848382 |
| 194 | H | 2.721416 | 0.188174 | 1.261594 |
| 195 | H | -0.079371 | 2.215382 | 2.760636 |
| 196 | H | 1.668 | 2.394905 | 2.792108 |
| 197 | H | -0.199146 | 2.71925 | -3.352005 |
| 198 | H | 2.404192 | -3.657283 | 1.885106 |
| 199 | H | 2.160697 | 5.13184 | -1.853787 |
| 200 | H | 1.210845 | 4.289515 | -3.091586 |
| 201 | H | 2.80833 | 3.670976 | -2.619005 |
| 202 | H | -2.582975 | 2.54379 | -5.608829 |
| 203 | H | -1.674134 | 1.12457 | -6.151453 |
| 204 | H | -0.86447 | 2.385712 | -5.194096 |
| 205 | H | 7.908519 | -4.234846 | 0.308187 |
| 206 | H | 7.449523 | -3.789062 | -1.341526 |
| 207 | H | 6.788896 | -5.272629 | -0.59672 |
| 208 | H | -0.622687 | -3.483141 | 2.666875 |
| 209 | H | -0.319666 | -2.964953 | 4.333032 |
| 210 | H | 0.923136 | -3.865546 | 3.445733 |
| 211 | H | 4.429628 | -0.564841 | 0.557311 |
| 212 | H | -3.326687 | 1.961499 | 1.306115 |
| 213 | O | 5.297722 | -1.448043 | 3.708684 |
| 214 | H | 4.708788 | -1.907779 | 3.095398 |
| 215 | H | 6.05328 | -1.147492 | 3.162384 |
| 216 | O | 7.139673 | 0.09126 | 2.311085 |
| 217 | H | 6.31488 | 0.529982 | 2.008023 |
| 218 | H | 7.478219 | 0.756816 | 2.935024 |
| 219 | O | 4.124665 | 1.392921 | -2.381656 |
| 220 | H | 3.25242 | 1.390958 | -2.794367 |
| 221 | H | 3.924304 | 1.311806 | -1.418723 |
| 222 | O | 1.677061 | -1.665936 | -1.239233 |
| 223 | H | 1.537876 | -1.314395 | -0.35171 |
| 224 | H | 1.762247 | -2.640011 | -1.128898 |
| 225 | O | 6.841491 | 2.537599 | 3.648424 |
| 226 | H | 6.139873 | 2.611954 | 2.955883 |
| 227 | H | 7.097969 | 3.432482 | 3.898869 |
| 228 | C | -9.196661 | -6.431088 | 1.923522 |
| 229 | H | -8.953778 | -6.302314 | 2.957603 |
| 230 | H | -10.255052 | -6.344575 | 1.792285 |
| 231 | H | -8.874992 | -7.398758 | 1.599417 |
| 232 | C | -8.257691 | -1.314206 | 5.060193 |
| 233 | H | -8.183724 | -2.024758 | 5.856776 |
| 234 | H | -8.406068 | -0.335946 | 5.46749 |
| 235 | H | -9.085436 | -1.568108 | 4.431487 |
| 236 | C | -0.364192 | 1.212784 | 8.191112 |
| 237 | H | -1.171228 | 0.544485 | 8.407836 |
| 238 | H | 0.126869 | 1.486108 | 9.101636 |
| 239 | H | -0.74665 | 2.091153 | 7.71457 |
| 240 | C | -4.683981 | 7.715659 | -3.874557 |
| 241 | H | -4.67658 | 8.555762 | -4.53718 |
| 242 | H | -5.297426 | 6.941819 | -4.286572 |
| 243 | H | -5.076127 | 8.01399 | -2.924756 |
| 244 | C | -8.906276 | 1.795732 | -5.373567 |
| 245 | H | -9.829835 | 2.33315 | -5.429444 |
| 246 | H | -8.092405 | 2.488915 | -5.328738 |
| 247 | H | -8.800585 | 1.177133 | -6.240207 |
| 248 | C | 10.250469 | 0.705301 | -4.697964 |
| 249 | H | 10.221675 | 0.654666 | -5.766377 |
| 250 | H | 10.898226 | -0.058878 | -4.322009 |
| 251 | C | 8.703371 | 4.988392 | -0.932646 |
| 252 | H | 8.386847 | 5.995348 | -1.108011 |
| 253 | H | 9.699261 | 4.990583 | -0.541367 |
| 254 | H | 8.682892 | 4.442708 | -1.852814 |
| 255 | H | 2.097568 | -7.995644 | -2.656127 |
| 256 | H | 3.303252 | -6.761207 | -2.93101 |
| 257 | H | -0.371448 | -4.24047 | -3.670846 |
| 258 | H | -7.920174 | 8.252617 | 1.80138 |
| 259 | H | -7.731989 | 6.845533 | 0.782672 |
| 260 | H | 10.617211 | 1.664088 | -4.39609 |
| 261 | H | -9.130212 | -4.497579 | 1.011994 |

**Table 7. Optimized ground-state atomic coordinates of the QM cluster model for the IIA site (including BR, water molecules, and residues truncated at Cα with methyl caps) derived from snapshot 2.**

| **Atomic number** | **Element** | **X** | **Y** | **Z** |
| --- | --- | --- | --- | --- |
| 1 | C | -8.843359 | -3.561353 | 2.8034 |
| 2 | C | -7.397642 | -3.064262 | 2.355183 |
| 3 | C | -7.219567 | -1.60486 | 1.866579 |
| 4 | C | -6.601497 | -1.303535 | 0.63724 |
| 5 | C | -7.397243 | -0.591453 | 2.791317 |
| 6 | C | -6.288574 | 0.038592 | 0.22813 |
| 7 | C | -7.178536 | 0.78599 | 2.347785 |
| 8 | C | -6.551953 | 1.06793 | 1.14171 |
| 9 | O | -6.13638 | 2.301417 | 0.796015 |
| 10 | H | -6.648624 | -3.143051 | 3.147436 |
| 11 | H | -7.036679 | -3.667786 | 1.526891 |
| 12 | H | -6.293958 | -2.085126 | -0.045354 |
| 13 | H | -7.85499 | -0.726838 | 3.75653 |
| 14 | H | -5.769466 | 0.171243 | -0.708546 |
| 15 | H | -7.339381 | 1.575409 | 3.067468 |
| 16 | H | -5.326571 | 2.443478 | 1.282767 |
| 17 | C | -8.223412 | -5.003407 | -2.636483 |
| 18 | C | -8.573919 | -6.456423 | -2.26569 |
| 19 | C | -6.96641 | -4.550311 | -1.831965 |
| 20 | C | -5.85608 | -5.573876 | -1.792206 |
| 21 | C | -5.226099 | -5.83106 | -3.1562 |
| 22 | O | -5.534023 | -5.171566 | -4.204223 |
| 23 | O | -4.402804 | -6.765435 | -3.290096 |
| 24 | H | -8.017017 | -4.942652 | -3.684629 |
| 25 | H | -6.59566 | -3.554144 | -2.058676 |
| 26 | H | -7.380247 | -4.491883 | -0.833454 |
| 27 | H | -5.111958 | -5.131076 | -1.12534 |
| 28 | H | -6.303937 | -6.431877 | -1.297979 |
| 29 | C | -0.607499 | -4.910715 | 6.538804 |
| 30 | C | -0.117983 | -4.888015 | 5.100417 |
| 31 | C | 1.144973 | -5.682814 | 4.94378 |
| 32 | C | 2.48408 | -4.886649 | 5.219844 |
| 33 | C | 2.801013 | -3.788995 | 4.272164 |
| 34 | N | 3.833971 | -2.860397 | 4.785342 |
| 35 | H | -0.013738 | -4.243663 | 7.1282 |
| 36 | H | -0.85663 | -5.48183 | 4.575551 |
| 37 | H | -0.082996 | -3.857254 | 4.715698 |
| 38 | H | 1.079584 | -6.554953 | 5.595546 |
| 39 | H | 1.223575 | -6.008051 | 3.913176 |
| 40 | H | 2.435351 | -4.6581 | 6.287314 |
| 41 | H | 3.338583 | -5.557672 | 5.181719 |
| 42 | H | 3.092484 | -3.906498 | 3.223285 |
| 43 | H | 1.934 | -3.12572 | 4.218724 |
| 44 | H | 3.992243 | -2.212555 | 4.023903 |
| 45 | H | 3.422272 | -2.516899 | 5.634861 |
| 46 | H | 4.682303 | -3.385459 | 4.956237 |
| 47 | C | 7.671042 | 5.061048 | 1.695637 |
| 48 | C | 6.699865 | 3.969387 | 1.93056 |
| 49 | C | 6.894178 | 2.729459 | 1.098081 |
| 50 | C | 8.342569 | 2.167511 | 1.206569 |
| 51 | N | 8.410241 | 0.850485 | 0.605461 |
| 52 | C | 9.453633 | 0.285152 | 0.105499 |
| 53 | N | 10.69063 | 0.745706 | 0.094104 |
| 54 | N | 9.291837 | -0.843335 | -0.411391 |
| 55 | H | 6.881682 | 3.591817 | 2.930451 |
| 56 | H | 5.681205 | 4.343104 | 1.864467 |
| 57 | H | 6.219738 | 2.006497 | 1.549585 |
| 58 | H | 6.526217 | 2.896264 | 0.086853 |
| 59 | H | 8.949058 | 2.881678 | 0.640591 |
| 60 | H | 8.771899 | 2.011523 | 2.191025 |
| 61 | H | 7.549362 | 0.326252 | 0.530291 |
| 62 | H | 10.890347 | 1.54445 | 0.665436 |
| 63 | H | 11.527115 | 0.270743 | -0.22355 |
| 64 | H | 8.3731 | -1.258125 | -0.387141 |
| 65 | H | 10.062373 | -1.39836 | -0.766816 |
| 66 | C | 8.931482 | 5.003759 | -4.510337 |
| 67 | C | 7.464838 | 4.650826 | -4.122791 |
| 68 | C | 7.309811 | 3.162496 | -3.880627 |
| 69 | C | 8.238067 | 2.503581 | -2.867153 |
| 70 | N | 7.976343 | 1.082591 | -2.849862 |
| 71 | C | 8.667721 | 0.134677 | -3.493161 |
| 72 | N | 9.912132 | 0.178475 | -3.887553 |
| 73 | N | 8.005113 | -0.974099 | -3.559094 |
| 74 | H | 9.247766 | 4.376841 | -5.317702 |
| 75 | H | 7.067451 | 5.220446 | -3.283377 |
| 76 | H | 6.839087 | 4.950624 | -4.961514 |
| 77 | H | 6.257741 | 2.959402 | -3.647599 |
| 78 | H | 7.437269 | 2.760506 | -4.88629 |
| 79 | H | 9.270617 | 2.567191 | -3.238635 |
| 80 | H | 8.073327 | 2.960758 | -1.887302 |
| 81 | H | 7.054281 | 0.718952 | -2.645047 |
| 82 | H | 10.45513 | 1.027903 | -3.808652 |
| 83 | H | 10.435785 | -0.595902 | -4.281286 |
| 84 | H | 7.00855 | -0.872637 | -3.482509 |
| 85 | H | 8.467949 | -1.677175 | -4.122936 |
| 86 | C | -4.378367 | 8.285939 | 1.715955 |
| 87 | C | -2.844995 | 7.932285 | 1.461004 |
| 88 | C | -2.387983 | 6.465091 | 1.740072 |
| 89 | C | -3.168371 | 5.62276 | 0.716611 |
| 90 | C | -0.923411 | 6.229054 | 1.681189 |
| 91 | H | -4.983754 | 7.433896 | 1.486982 |
| 92 | H | -2.629007 | 8.236965 | 0.43586 |
| 93 | H | -2.270841 | 8.634396 | 2.055973 |
| 94 | H | -2.703756 | 6.10858 | 2.720984 |
| 95 | H | -3.12399 | 6.179517 | -0.219045 |
| 96 | H | -2.693207 | 4.648227 | 0.623853 |
| 97 | H | -4.222978 | 5.410146 | 0.921302 |
| 98 | H | -0.732813 | 5.166531 | 1.826913 |
| 99 | H | -0.518065 | 6.572278 | 0.728444 |
| 100 | H | -0.431621 | 6.733649 | 2.519255 |
| 101 | C | -7.608306 | 4.337831 | 5.311416 |
| 102 | C | -6.116837 | 4.123129 | 5.666414 |
| 103 | C | -5.376347 | 3.404695 | 4.571002 |
| 104 | C | -5.016133 | 3.893083 | 3.319474 |
| 105 | N | -4.655453 | 2.275081 | 4.702427 |
| 106 | C | -3.850075 | 2.107121 | 3.582121 |
| 107 | N | -4.058315 | 3.041142 | 2.690593 |
| 108 | H | -8.149214 | 3.430063 | 5.479565 |
| 109 | H | -5.553682 | 5.035895 | 5.824573 |
| 110 | H | -6.059491 | 3.533936 | 6.575625 |
| 111 | H | -4.764128 | 1.526914 | 5.383484 |
| 112 | H | -5.258561 | 4.851741 | 2.867363 |
| 113 | H | -3.327437 | 1.22352 | 3.239351 |
| 114 | C | -9.255326 | 5.1813 | -3.597725 |
| 115 | C | -9.15523 | 3.783468 | -2.999438 |
| 116 | C | -7.816692 | 3.06853 | -3.447296 |
| 117 | C | -7.803147 | 1.668871 | -2.80535 |
| 118 | N | -6.703414 | 0.765797 | -3.260418 |
| 119 | C | -6.771598 | -0.359209 | -3.88197 |
| 120 | N | -7.835453 | -0.667922 | -4.540676 |
| 121 | N | -5.711069 | -1.179916 | -3.896377 |
| 122 | H | -8.273046 | 5.586294 | -3.724237 |
| 123 | H | -9.114166 | 3.841627 | -1.914528 |
| 124 | H | -10.026265 | 3.222454 | -3.336428 |
| 125 | H | -7.845213 | 3.045149 | -4.537957 |
| 126 | H | -6.954636 | 3.555045 | -2.98919 |
| 127 | H | -7.781771 | 1.888832 | -1.74128 |
| 128 | H | -8.75291 | 1.20148 | -3.060876 |
| 129 | H | -5.754723 | 1.005485 | -3.009442 |
| 130 | H | -8.509048 | 0.037838 | -4.80216 |
| 131 | H | -7.854634 | -1.554137 | -5.02115 |
| 132 | H | -4.898095 | -0.955842 | -3.34386 |
| 133 | H | -5.838491 | -2.069848 | -4.350848 |
| 134 | C | 0.277266 | -0.161612 | -4.632635 |
| 135 | C | 1.554465 | -1.035552 | -4.471068 |
| 136 | O | 2.39191 | -0.829741 | -3.57415 |
| 137 | C | -1.015971 | -0.70922 | -4.001079 |
| 138 | H | 0.475913 | 0.796618 | -4.199973 |
| 139 | H | -1.718133 | 0.097774 | -4.163601 |
| 140 | H | -1.386898 | -1.622938 | -4.458555 |
| 141 | H | -0.724174 | -0.995668 | -2.992309 |
| 142 | N | 1.783948 | -1.92954 | -5.482924 |
| 143 | C | 2.976542 | -2.729855 | -5.63493 |
| 144 | H | 1.052901 | -1.914216 | -6.184877 |
| 145 | H | 3.250541 | -3.145145 | -4.68764 |
| 146 | C | 2.566341 | 1.75284 | 3.576553 |
| 147 | C | -3.574841 | 2.610961 | -4.240147 |
| 148 | C | 4.270164 | -5.305818 | -1.527592 |
| 149 | C | -2.11102 | -2.73035 | 2.498704 |
| 150 | C | 3.991951 | 1.520206 | 3.058116 |
| 151 | C | -3.685752 | 3.711042 | -5.003168 |
| 152 | C | 3.613375 | -6.362684 | -1.030536 |
| 153 | C | -3.124864 | -2.73473 | 1.357905 |
| 154 | O | -3.975954 | 0.42891 | -2.200143 |
| 155 | C | 4.505387 | 0.095984 | 3.082899 |
| 156 | C | -3.1245 | -1.492945 | 0.519075 |
| 157 | N | 1.419647 | -1.895615 | 1.818565 |
| 158 | C | 0.093317 | -0.410251 | 3.268609 |
| 159 | C | -0.376428 | 2.880906 | -0.384776 |
| 160 | C | 2.369821 | -3.65674 | 0.313815 |
| 161 | C | 2.212118 | 3.771392 | 1.146802 |
| 162 | C | -1.145258 | 4.386665 | -3.009244 |
| 163 | C | 6.990902 | -3.720896 | -1.649685 |
| 164 | C | -0.535359 | -4.786857 | 0.621247 |
| 165 | C | 0.409289 | 0.815867 | 2.474312 |
| 166 | C | -1.427927 | 2.544108 | -1.19786 |
| 167 | C | 5.65493 | -2.204019 | -0.041097 |
| 168 | C | 1.334929 | -3.054564 | 1.082796 |
| 169 | O | 5.725377 | -0.091998 | 3.271033 |
| 170 | O | -3.588807 | -1.670244 | -0.687667 |
| 171 | C | 1.477813 | 1.715806 | 2.547983 |
| 172 | C | -1.805716 | 3.184923 | -2.439075 |
| 173 | C | 5.749767 | -3.36863 | -0.915688 |
| 174 | C | 0.01879 | -3.541282 | 1.227447 |
| 175 | O | 3.686791 | -0.858891 | 2.8906 |
| 176 | O | -2.74903 | -0.404175 | 0.947227 |
| 177 | C | 1.306992 | 2.635462 | 1.483829 |
| 178 | C | -2.848083 | 2.458001 | -2.99418 |
| 179 | C | 4.567752 | -4.060285 | -0.823653 |
| 180 | C | -0.678939 | -2.632882 | 2.066427 |
| 181 | C | 0.139807 | 2.261033 | 0.779429 |
| 182 | C | -3.124736 | 1.351984 | -2.086879 |
| 183 | C | 3.673332 | -3.329056 | 0.067097 |
| 184 | C | 0.234796 | -1.63685 | 2.422306 |
| 185 | N | 4.381488 | -2.197517 | 0.492871 |
| 186 | O | 6.53115 | -1.365388 | 0.203307 |
| 187 | H | -1.200746 | 0.611953 | 1.186294 |
| 188 | H | 2.549568 | 2.745984 | 4.055142 |
| 189 | H | 2.34495 | 1.034731 | 4.379912 |
| 190 | H | -4.092866 | 1.703209 | -4.572691 |
| 191 | H | 4.675727 | -5.376519 | -2.543949 |
| 192 | H | -2.26172 | -3.654478 | 3.081412 |
| 193 | H | -2.346968 | -1.90141 | 3.181693 |
| 194 | H | -2.405018 | 0.847804 | -0.222281 |
| 195 | H | 4.71639 | 2.130591 | 3.614356 |
| 196 | H | 4.068458 | 1.847756 | 2.007683 |
| 197 | H | -4.260581 | 3.681505 | -5.931828 |
| 198 | H | -3.234697 | 4.667031 | -4.729787 |
| 199 | H | 3.236536 | -6.38633 | -0.004403 |
| 200 | H | 3.459526 | -7.258061 | -1.637816 |
| 201 | H | -4.149529 | -2.815273 | 1.763589 |
| 202 | H | -3.003715 | -3.598588 | 0.69022 |
| 203 | H | 2.262686 | -1.346258 | 2.036001 |
| 204 | H | -0.93003 | -0.358628 | 3.668234 |
| 205 | H | 0.76957 | -0.462869 | 4.134846 |
| 206 | H | 0.183155 | 3.762833 | -0.701038 |
| 207 | H | 2.047377 | -4.563123 | -0.199263 |
| 208 | H | 2.698272 | 4.170807 | 2.048927 |
| 209 | H | 1.675446 | 4.600995 | 0.665366 |
| 210 | H | 3.014533 | 3.456831 | 0.457767 |
| 211 | H | -1.044883 | 4.294226 | -4.101057 |
| 212 | H | -0.147264 | 4.553429 | -2.583826 |
| 213 | H | -1.743662 | 5.292177 | -2.814281 |
| 214 | H | 6.790375 | -4.390799 | -2.497157 |
| 215 | H | 7.711135 | -4.232554 | -0.988563 |
| 216 | H | 7.487599 | -2.818192 | -2.030519 |
| 217 | H | 0.252381 | -5.514236 | 0.380404 |
| 218 | H | -1.086399 | -4.584529 | -0.312583 |
| 219 | H | -1.236477 | -5.280269 | 1.311365 |
| 220 | H | 4.193382 | -1.702888 | 1.378854 |
| 221 | H | -3.70066 | -0.809514 | -1.210822 |
| 222 | O | 3.409026 | 0.088017 | -1.214666 |
| 223 | H | 3.497281 | -0.681639 | -0.630941 |
| 224 | H | 2.809567 | -0.206477 | -1.931776 |
| 225 | O | 5.393018 | -0.17218 | -2.982707 |
| 226 | H | 4.795844 | -0.174318 | -3.743136 |
| 227 | H | 4.765974 | -0.072174 | -2.219287 |
| 228 | O | 7.416765 | 1.736203 | 4.392638 |
| 229 | H | 6.803037 | 1.093778 | 3.974246 |
| 230 | H | 6.87991 | 2.151774 | 5.075639 |
| 231 | O | 6.146347 | -2.792935 | 3.29731 |
| 232 | H | 6.112191 | -1.810582 | 3.227968 |
| 233 | H | 6.619359 | -3.069194 | 2.505695 |
| 234 | H | -9.744408 | 5.128381 | -4.547935 |
| 235 | H | -9.818813 | 5.810787 | -2.94112 |
| 236 | H | 8.983597 | 6.028707 | -4.813102 |
| 237 | H | 9.570666 | 4.848195 | -3.666452 |
| 238 | H | -8.013361 | 5.113629 | 5.927022 |
| 239 | H | -7.693204 | 4.618201 | 4.282297 |
| 240 | H | -4.516258 | 8.556063 | 2.742073 |
| 241 | H | -4.664296 | 9.105233 | 1.089934 |
| 242 | H | 7.536188 | 5.452177 | 0.708858 |
| 243 | H | 7.512946 | 5.839483 | 2.412537 |
| 244 | H | 8.666176 | 4.680781 | 1.79566 |
| 245 | H | -1.631172 | -4.601062 | 6.57211 |
| 246 | H | -0.522279 | -5.903406 | 6.928937 |
| 247 | H | -8.945559 | -4.603887 | 2.585283 |
| 248 | H | -8.964799 | -3.403332 | 3.854678 |
| 249 | H | -9.590705 | -3.010697 | 2.271281 |
| 250 | H | -9.048624 | -4.365441 | -2.397896 |
| 251 | H | -8.716235 | -7.028056 | -3.158932 |
| 252 | H | -7.775456 | -6.88113 | -1.693867 |
| 253 | H | -9.473602 | -6.469647 | -1.686641 |
| 254 | H | 0.101278 | -0.024412 | -5.679128 |
| 255 | H | 2.788879 | -3.521071 | -6.330385 |
| 256 | H | 3.773765 | -2.116254 | -5.999389 |
| 257 | N | -2.282707 | 1.458102 | -1.039103 |
| 258 | N | -0.370913 | 1.152828 | 1.422145 |

**Table 8. Optimized ground-state atomic coordinates of the QM cluster model for the IIA site (including BR, water molecules, and residues truncated at Cα with methyl caps) derived from snapshot 3.**

| **Atomic number** | **Element** | **X** | **Y** | **Z** |
| --- | --- | --- | --- | --- |
| 1 | C | -5.530316 | -6.929051 | 1.909337 |
| 2 | C | -4.441165 | -5.91386 | 1.583704 |
| 3 | C | -4.971975 | -4.439287 | 1.619456 |
| 4 | C | -5.307662 | -3.998064 | 2.894853 |
| 5 | C | -4.866984 | -3.486861 | 0.601585 |
| 6 | C | -5.574366 | -2.669477 | 3.178267 |
| 7 | C | -5.277505 | -2.184438 | 0.816211 |
| 8 | C | -5.674147 | -1.756523 | 2.116388 |
| 9 | O | -5.934554 | -0.491388 | 2.275963 |
| 10 | H | -3.746358 | -5.933061 | 2.420706 |
| 11 | H | -4.014043 | -6.144507 | 0.605456 |
| 12 | H | -5.241515 | -4.653251 | 3.754419 |
| 13 | H | -4.636028 | -3.814292 | -0.402182 |
| 14 | H | -5.931117 | -2.358759 | 4.150473 |
| 15 | H | -5.334747 | -1.501179 | -0.014499 |
| 16 | H | -5.754753 | 0.064425 | 1.52394 |
| 17 | C | -6.930501 | -4.856983 | -3.853788 |
| 18 | C | -6.907512 | -6.175685 | -4.648836 |
| 19 | C | -5.557548 | -4.571949 | -3.317547 |
| 20 | C | -4.390277 | -4.555821 | -4.337997 |
| 21 | C | -4.664995 | -3.517345 | -5.443707 |
| 22 | O | -4.038558 | -3.683187 | -6.518778 |
| 23 | O | -5.494314 | -2.585562 | -5.286828 |
| 24 | H | -7.235165 | -4.057993 | -4.496978 |
| 25 | H | -5.643608 | -3.609485 | -2.803002 |
| 26 | H | -5.31712 | -5.365068 | -2.620155 |
| 27 | H | -3.427678 | -4.351392 | -3.856631 |
| 28 | H | -4.293561 | -5.542689 | -4.787037 |
| 29 | C | 3.34666 | -7.376599 | 4.301342 |
| 30 | C | 3.576623 | -6.562172 | 2.959843 |
| 31 | C | 3.532333 | -4.999493 | 3.043927 |
| 32 | C | 4.435399 | -4.359915 | 4.080273 |
| 33 | C | 5.865326 | -4.331504 | 3.517806 |
| 34 | N | 6.27364 | -3.058322 | 2.835585 |
| 35 | H | 4.479786 | -6.911116 | 2.466147 |
| 36 | H | 2.80229 | -6.716625 | 2.205421 |
| 37 | H | 3.787179 | -4.67598 | 2.040637 |
| 38 | H | 2.549716 | -4.722206 | 3.41699 |
| 39 | H | 4.149026 | -3.335658 | 4.305413 |
| 40 | H | 4.37375 | -4.922437 | 5.010417 |
| 41 | H | 6.511309 | -4.414056 | 4.386488 |
| 42 | H | 6.015949 | -5.263725 | 2.964348 |
| 43 | H | 5.517234 | -2.87262 | 2.196104 |
| 44 | H | 6.494768 | -2.331226 | 3.495073 |
| 45 | H | 7.042467 | -3.244542 | 2.204656 |
| 46 | C | 6.049483 | 6.039852 | 3.584118 |
| 47 | C | 5.455821 | 4.594821 | 3.835411 |
| 48 | C | 6.355512 | 3.599291 | 4.547084 |
| 49 | C | 7.720127 | 3.181879 | 3.936024 |
| 50 | N | 7.527743 | 2.444785 | 2.685152 |
| 51 | C | 7.958465 | 2.736779 | 1.491915 |
| 52 | N | 8.499002 | 3.864164 | 1.129382 |
| 53 | N | 7.828869 | 1.943958 | 0.466308 |
| 54 | H | 7.118185 | 5.988969 | 3.570433 |
| 55 | H | 4.560595 | 4.735537 | 4.442592 |
| 56 | H | 5.177515 | 4.095388 | 2.896203 |
| 57 | H | 6.662961 | 4.102587 | 5.463146 |
| 58 | H | 5.789675 | 2.729274 | 4.864576 |
| 59 | H | 8.314391 | 4.093844 | 3.860054 |
| 60 | H | 8.347131 | 2.522276 | 4.533258 |
| 61 | H | 6.934123 | 1.637565 | 2.766455 |
| 62 | H | 8.866203 | 4.461727 | 1.855592 |
| 63 | H | 8.786137 | 4.001195 | 0.165858 |
| 64 | H | 7.293004 | 1.096387 | 0.635121 |
| 65 | H | 7.955184 | 2.368137 | -0.435629 |
| 66 | C | 5.408969 | 8.199652 | -2.512627 |
| 67 | C | 4.260568 | 7.221216 | -2.207934 |
| 68 | C | 3.177575 | 7.082594 | -3.235994 |
| 69 | C | 3.602582 | 6.487746 | -4.5801 |
| 70 | N | 4.057551 | 5.101273 | -4.480625 |
| 71 | C | 4.879933 | 4.394936 | -5.239356 |
| 72 | N | 5.444623 | 4.928177 | -6.29277 |
| 73 | N | 5.190835 | 3.161613 | -5.036488 |
| 74 | H | 5.688317 | 8.112343 | -3.541822 |
| 75 | H | 4.663047 | 6.244099 | -1.929092 |
| 76 | H | 3.809632 | 7.514981 | -1.266414 |
| 77 | H | 2.370377 | 6.492961 | -2.808367 |
| 78 | H | 2.618511 | 7.989079 | -3.477514 |
| 79 | H | 2.814342 | 6.614621 | -5.326679 |
| 80 | H | 4.366729 | 7.110017 | -5.043522 |
| 81 | H | 3.792835 | 4.671755 | -3.606816 |
| 82 | H | 5.233195 | 5.888402 | -6.506701 |
| 83 | H | 5.90639 | 4.292741 | -6.919101 |
| 84 | H | 4.799428 | 2.581082 | -4.312829 |
| 85 | H | 5.735957 | 2.726434 | -5.762065 |
| 86 | C | -5.537999 | 5.299868 | 5.75515 |
| 87 | C | -4.287623 | 5.782026 | 5.059677 |
| 88 | C | -3.522895 | 4.647096 | 4.437655 |
| 89 | C | -4.303013 | 3.820442 | 3.365013 |
| 90 | C | -2.20771 | 5.076842 | 3.901412 |
| 91 | H | -5.852356 | 4.373359 | 5.321951 |
| 92 | H | -4.521509 | 6.41833 | 4.197462 |
| 93 | H | -3.685422 | 6.3779 | 5.753139 |
| 94 | H | -3.358155 | 3.951753 | 5.267745 |
| 95 | H | -3.631983 | 3.028971 | 3.023608 |
| 96 | H | -5.191419 | 3.344325 | 3.787099 |
| 97 | H | -4.754808 | 4.456748 | 2.608553 |
| 98 | H | -2.258623 | 5.792248 | 3.075527 |
| 99 | H | -1.630113 | 5.46304 | 4.740585 |
| 100 | H | -1.742581 | 4.168405 | 3.536157 |
| 101 | C | -6.290748 | -0.596313 | 7.79361 |
| 102 | C | -4.874954 | -0.1029 | 7.982226 |
| 103 | C | -3.977796 | 0.056062 | 6.701703 |
| 104 | C | -3.349507 | -0.948761 | 6.016003 |
| 105 | N | -3.873768 | 1.139429 | 5.86864 |
| 106 | C | -3.281841 | 0.704077 | 4.709463 |
| 107 | N | -2.951594 | -0.565341 | 4.775134 |
| 108 | H | -6.278846 | -1.648399 | 7.598997 |
| 109 | H | -4.784444 | 0.840474 | 8.512841 |
| 110 | H | -4.400135 | -0.890246 | 8.556624 |
| 111 | H | -4.377657 | 2.003505 | 6.022161 |
| 112 | H | -3.164578 | -1.953439 | 6.374923 |
| 113 | H | -3.094895 | 1.310657 | 3.836415 |
| 114 | C | -10.822001 | 3.175869 | 0.406996 |
| 115 | C | -10.418704 | 1.726851 | 0.18473 |
| 116 | C | -9.109227 | 1.672938 | -0.62085 |
| 117 | C | -8.793246 | 0.145718 | -0.909919 |
| 118 | N | -7.517981 | -0.071882 | -1.552632 |
| 119 | C | -7.34324 | -0.583149 | -2.748411 |
| 120 | N | -8.303309 | -0.888188 | -3.576197 |
| 121 | N | -6.134544 | -0.907718 | -3.089431 |
| 122 | H | -10.321442 | 3.556649 | 1.272644 |
| 123 | H | -10.173089 | 1.199913 | 1.110206 |
| 124 | H | -11.191575 | 1.219795 | -0.376129 |
| 125 | H | -9.132785 | 2.190201 | -1.570784 |
| 126 | H | -8.270132 | 1.979484 | 0.007202 |
| 127 | H | -8.854542 | -0.453795 | -0.002801 |
| 128 | H | -9.501719 | -0.294599 | -1.607551 |
| 129 | H | -6.693836 | 0.239949 | -1.063582 |
| 130 | H | -9.269372 | -0.616083 | -3.459647 |
| 131 | H | -8.12038 | -1.445349 | -4.393637 |
| 132 | H | -5.318008 | -0.668747 | -2.531429 |
| 133 | H | -5.967549 | -1.367278 | -3.972895 |
| 134 | C | -0.062252 | 3.824695 | -4.337931 |
| 135 | C | 0.94315 | 3.177143 | -5.296915 |
| 136 | O | 1.675852 | 2.236853 | -4.937468 |
| 137 | C | -0.5072 | 2.739573 | -3.411902 |
| 138 | H | 0.409048 | 4.610406 | -3.785263 |
| 139 | H | 0.403499 | 2.386089 | -2.933053 |
| 140 | H | -1.1305 | 3.285981 | -2.701001 |
| 141 | H | -1.026187 | 1.906577 | -3.899924 |
| 142 | N | 0.901995 | 3.627531 | -6.543694 |
| 143 | C | 1.672853 | 3.149106 | -7.778557 |
| 144 | H | 0.289724 | 4.405347 | -6.726791 |
| 145 | H | 2.046631 | 2.161611 | -7.605222 |
| 146 | C | 3.169901 | 0.905846 | 1.478182 |
| 147 | C | -6.118779 | 4.142002 | -0.06385 |
| 148 | C | 5.520893 | -6.065532 | -3.355867 |
| 149 | C | -1.097582 | -2.136282 | -1.231763 |
| 150 | C | 4.150261 | 0.468813 | 0.366991 |
| 151 | C | -6.401242 | 5.439741 | 0.141236 |
| 152 | C | 4.404091 | -6.751722 | -3.63797 |
| 153 | C | -1.24292 | -1.056757 | -2.306286 |
| 154 | O | -5.635198 | 1.194873 | 0.186342 |
| 155 | C | 5.106859 | -0.558025 | 0.932983 |
| 156 | C | -2.668543 | -0.653262 | -2.552812 |
| 157 | N | 2.403313 | -2.647393 | -0.195055 |
| 158 | C | 0.868394 | -1.332432 | 1.266893 |
| 159 | C | -1.259409 | 3.020885 | 0.199546 |
| 160 | C | 3.495929 | -4.102744 | -1.939143 |
| 161 | C | 1.818876 | 3.667602 | 0.538687 |
| 162 | C | -3.1464 | 5.419019 | -0.196788 |
| 163 | C | 8.241157 | -5.804052 | -1.751524 |
| 164 | C | 0.639797 | -3.920227 | -3.180674 |
| 165 | C | 0.764963 | 0.142668 | 1.037513 |
| 166 | C | -2.616403 | 2.890636 | 0.077842 |
| 167 | C | 6.727083 | -4.232891 | -0.374224 |
| 168 | C | 2.41772 | -3.358591 | -1.377501 |
| 169 | O | 6.271587 | -0.232865 | 1.245271 |
| 170 | O | -3.021818 | -0.367761 | -3.798383 |
| 171 | C | 1.754651 | 1.129545 | 1.05478 |
| 172 | C | -3.543276 | 3.993976 | -0.068249 |
| 173 | C | 6.944822 | -5.118921 | -1.511338 |
| 174 | C | 1.115521 | -3.288556 | -1.915172 |
| 175 | O | 4.62346 | -1.720176 | 1.117603 |
| 176 | O | -3.498125 | -0.55366 | -1.670779 |
| 177 | C | 1.136094 | 2.351527 | 0.69224 |
| 178 | C | -4.826456 | 3.48852 | -0.018128 |
| 179 | C | 5.752247 | -5.216921 | -2.192268 |
| 180 | C | 0.333291 | -2.514184 | -1.025612 |
| 181 | C | -0.235003 | 2.086115 | 0.495012 |
| 182 | C | -4.721541 | 2.035747 | 0.124737 |
| 183 | C | 4.774622 | -4.358021 | -1.527336 |
| 184 | C | 1.168705 | -2.13461 | 0.030199 |
| 185 | N | 5.426105 | -3.825393 | -0.422149 |
| 186 | O | 7.537188 | -3.893092 | 0.510503 |
| 187 | H | -1.303404 | 0.268617 | 0.786245 |
| 188 | H | 3.558824 | 1.813043 | 1.965403 |
| 189 | H | 3.162171 | 0.130217 | 2.260246 |
| 190 | H | -6.950811 | 3.462207 | -0.271264 |
| 191 | H | 6.380132 | -6.174278 | -4.0284 |
| 192 | H | -1.685085 | -3.019394 | -1.533997 |
| 193 | H | -1.553705 | -1.78886 | -0.293648 |
| 194 | H | -3.107697 | 0.789621 | -0.060058 |
| 195 | H | 4.697799 | 1.32934 | -0.041208 |
| 196 | H | 3.592136 | -0.00621 | -0.453428 |
| 197 | H | -7.433348 | 5.792929 | 0.074318 |
| 198 | H | -5.641974 | 6.181922 | 0.394875 |
| 199 | H | 3.532939 | -6.747316 | -2.977761 |
| 200 | H | 4.345011 | -7.371964 | -4.535701 |
| 201 | H | -0.771371 | -1.383205 | -3.244973 |
| 202 | H | -0.706699 | -0.142236 | -1.99551 |
| 203 | H | 3.22307 | -2.362516 | 0.367878 |
| 204 | H | -0.069848 | -1.697382 | 1.715273 |
| 205 | H | 1.657904 | -1.523794 | 2.008012 |
| 206 | H | -0.893846 | 4.041585 | 0.078908 |
| 207 | H | 3.235993 | -4.581115 | -2.884386 |
| 208 | H | 2.27667 | 3.767883 | -0.460081 |
| 209 | H | 2.629106 | 3.779833 | 1.274661 |
| 210 | H | 1.130885 | 4.51402 | 0.670925 |
| 211 | H | -3.810014 | 5.937403 | -0.904331 |
| 212 | H | -2.113241 | 5.535847 | -0.548758 |
| 213 | H | -3.232281 | 5.943472 | 0.769637 |
| 214 | H | 8.29885 | -6.762698 | -1.208373 |
| 215 | H | 9.073837 | -5.180903 | -1.393198 |
| 216 | H | 8.39982 | -6.022024 | -2.817178 |
| 217 | H | 0.821199 | -3.273895 | -4.055942 |
| 218 | H | -0.441828 | -4.117115 | -3.143304 |
| 219 | H | 1.139631 | -4.879151 | -3.379851 |
| 220 | H | 5.104224 | -3.018895 | 0.129187 |
| 221 | H | -2.304694 | -0.549523 | -4.422437 |
| 222 | O | 8.676693 | -0.923759 | 2.295752 |
| 223 | H | 7.834399 | -0.809397 | 1.812528 |
| 224 | H | 9.205671 | -1.546815 | 1.745384 |
| 225 | O | 9.916027 | -2.682309 | 0.614518 |
| 226 | H | 9.988075 | -2.19304 | -0.214141 |
| 227 | H | 9.116663 | -3.240221 | 0.485502 |
| 228 | O | 7.452293 | -1.38124 | 4.583632 |
| 229 | H | 7.077524 | -0.536535 | 4.858125 |
| 230 | H | 8.063273 | -1.161086 | 3.831907 |
| 231 | H | -6.85664 | -0.404153 | 8.681157 |
| 232 | H | -6.739253 | -0.085764 | 6.967122 |
| 233 | H | -6.175355 | -7.043835 | 1.063377 |
| 234 | H | -5.080885 | -7.870914 | 2.145569 |
| 235 | H | -6.099348 | -6.585121 | 2.747678 |
| 236 | H | -7.620359 | -4.942889 | -3.04039 |
| 237 | H | -7.6197 | -6.124173 | -5.445727 |
| 238 | H | -5.929447 | -6.33084 | -5.054069 |
| 239 | H | -7.157418 | -6.98828 | -3.999117 |
| 240 | H | -5.334479 | 5.156179 | 6.795743 |
| 241 | H | -6.31329 | 6.028366 | 5.64063 |
| 242 | H | -11.880447 | 3.233128 | 0.552992 |
| 243 | H | -10.547938 | 3.757576 | -0.448226 |
| 244 | H | 5.733679 | 6.696419 | 4.367757 |
| 245 | H | 5.698035 | 6.41134 | 2.644236 |
| 246 | H | 5.0869 | 9.20054 | -2.314145 |
| 247 | H | 6.250041 | 7.966269 | -1.893734 |
| 248 | H | 2.572671 | -8.099991 | 4.151201 |
| 249 | H | 4.25271 | -7.875376 | 4.575561 |
| 250 | H | 3.059466 | -6.703837 | 5.082252 |
| 251 | H | -0.898333 | 4.208431 | -4.884622 |
| 252 | H | 1.019053 | 3.139432 | -8.625523 |
| 253 | H | 2.491158 | 3.812194 | -7.967217 |
| 254 | N | -0.409627 | 0.73427 | 0.707507 |
| 255 | N | -3.390235 | 1.731376 | 0.199289 |

**Table 9. Optimized ground-state atomic coordinates of the QM cluster model for the IB site (including BR, water molecules, and residues truncated at Cα with methyl caps) derived from snapshot 1.**

| **Atomic number** | **Element** | **X** | **Y** | **Z** |
| --- | --- | --- | --- | --- |
| 1 | C | 3.981061 | 5.934572 | 2.955036 |
| 2 | C | 4.790227 | 4.618273 | 2.921781 |
| 3 | O | 5.947422 | 4.600476 | 3.444738 |
| 4 | C | 4.420209 | 6.856479 | 1.822678 |
| 5 | C | 3.659333 | 8.228052 | 1.787286 |
| 6 | C | 2.156147 | 8.046061 | 1.640871 |
| 7 | N | 1.841249 | 7.389332 | 0.379196 |
| 8 | C | 1.511787 | 7.896466 | -0.80622 |
| 9 | N | 1.485907 | 9.177609 | -1.08641 |
| 10 | N | 1.367891 | 7.16674 | -1.82569 |
| 11 | H | 2.940042 | 5.712369 | 2.846355 |
| 12 | H | 5.478839 | 7.10546 | 1.933186 |
| 13 | H | 4.307145 | 6.309726 | 0.89355 |
| 14 | H | 3.768256 | 8.714454 | 2.758136 |
| 15 | H | 4.152098 | 8.870133 | 1.070407 |
| 16 | H | 1.742532 | 7.471877 | 2.471004 |
| 17 | H | 1.770451 | 9.066474 | 1.59975 |
| 18 | H | 2.036911 | 6.398159 | 0.299971 |
| 19 | H | 1.877057 | 9.825465 | -0.41486 |
| 20 | H | 1.40814 | 9.466514 | -2.05202 |
| 21 | H | 1.519476 | 6.16175 | -1.75922 |
| 22 | H | 1.14265 | 7.590176 | -2.71682 |
| 23 | N | 4.275399 | 3.532132 | 2.356583 |
| 24 | C | 4.985833 | 2.223545 | 2.211986 |
| 25 | C | 4.966431 | 1.670653 | 0.765537 |
| 26 | O | 3.987895 | 1.043957 | 0.344356 |
| 27 | C | 4.500531 | 1.287071 | 3.289972 |
| 28 | C | 5.245144 | -0.08568 | 3.310061 |
| 29 | C | 6.759188 | -0.03198 | 3.461338 |
| 30 | C | 4.62582 | -0.97553 | 4.415775 |
| 31 | H | 3.392198 | 3.669693 | 1.892649 |
| 32 | H | 6.029528 | 2.386334 | 2.488792 |
| 33 | H | 4.61095 | 1.725844 | 4.275965 |
| 34 | H | 3.435427 | 1.121372 | 3.375988 |
| 35 | H | 5.051263 | -0.51971 | 2.327445 |
| 36 | H | 7.210163 | 0.420881 | 4.345724 |
| 37 | H | 7.111368 | -1.05886 | 3.571259 |
| 38 | H | 7.200556 | 0.384461 | 2.561577 |
| 39 | H | 3.564412 | -0.77977 | 4.528864 |
| 40 | H | 4.718003 | -2.03526 | 4.157563 |
| 41 | H | 5.09484 | -0.7886 | 5.37987 |
| 42 | N | 6.088252 | 1.783989 | 0.1397 |
| 43 | C | 6.306545 | 1.187606 | -1.23579 |
| 44 | C | 6.260517 | -0.36184 | -1.231 |
| 45 | O | 6.543534 | -0.99988 | -0.20835 |
| 46 | C | 7.576356 | 1.772455 | -1.82649 |
| 47 | C | 8.8602 | 1.285872 | -1.24521 |
| 48 | C | 7.829101 | 1.57388 | -3.35417 |
| 49 | H | 6.944918 | 1.976029 | 0.63914 |
| 50 | H | 5.397731 | 1.523641 | -1.75313 |
| 51 | H | 7.498604 | 2.851107 | -1.80073 |
| 52 | H | 9.688953 | 1.790715 | -1.72698 |
| 53 | H | 8.830025 | 1.418555 | -0.16466 |
| 54 | H | 8.977383 | 0.228657 | -1.45177 |
| 55 | H | 8.504359 | 0.72877 | -3.5101 |
| 56 | H | 6.846748 | 1.446405 | -3.82303 |
| 57 | H | 8.309411 | 2.501142 | -3.65497 |
| 58 | N | 5.691779 | -1.00003 | -2.21778 |
| 59 | C | 5.613107 | -2.46534 | -2.36776 |
| 60 | C | 6.823765 | -3.08552 | -3.05119 |
| 61 | C | 4.404286 | -2.78955 | -3.18203 |
| 62 | C | 3.15419 | -2.20219 | -2.59793 |
| 63 | C | 1.844515 | -2.72981 | -3.30898 |
| 64 | N | 0.66058 | -1.89079 | -3.10208 |
| 65 | C | 0.293807 | -0.94949 | -3.89573 |
| 66 | N | 1.055145 | -0.44749 | -4.79576 |
| 67 | N | -0.92069 | -0.51293 | -3.72994 |
| 68 | H | 5.460537 | -0.32333 | -2.93248 |
| 69 | H | 5.476742 | -2.83102 | -1.34513 |
| 70 | H | 4.528162 | -2.45081 | -4.20892 |
| 71 | H | 4.303161 | -3.86977 | -3.09599 |
| 72 | H | 3.000371 | -2.62192 | -1.60487 |
| 73 | H | 2.999225 | -1.1367 | -2.68516 |
| 74 | H | 2.040573 | -2.77336 | -4.38316 |
| 75 | H | 1.642852 | -3.76182 | -3.02177 |
| 76 | H | -0.04473 | -2.23265 | -2.46345 |
| 77 | H | 1.874423 | -0.9794 | -5.03083 |
| 78 | H | 0.784263 | 0.392145 | -5.29789 |
| 79 | H | -1.5391 | -0.90384 | -3.03614 |
| 80 | H | -1.21653 | 0.158704 | -4.43443 |
| 81 | C | -2.95067 | -6.23557 | 3.063392 |
| 82 | C | -3.70054 | -7.07895 | 2.003906 |
| 83 | C | -4.77518 | -6.30471 | 1.243501 |
| 84 | C | -4.38424 | -5.65494 | 0.072229 |
| 85 | C | -6.15325 | -6.20851 | 1.57662 |
| 86 | C | -5.26667 | -4.93682 | -0.68554 |
| 87 | C | -7.02847 | -5.50903 | 0.845308 |
| 88 | C | -6.56006 | -4.84388 | -0.2984 |
| 89 | O | -7.45516 | -4.18515 | -1.13621 |
| 90 | H | -2.75775 | -5.25912 | 2.670669 |
| 91 | H | -2.92327 | -7.45745 | 1.344218 |
| 92 | H | -4.28775 | -7.8536 | 2.498065 |
| 93 | H | -3.34215 | -5.60252 | -0.21587 |
| 94 | H | -6.5035 | -6.59736 | 2.527733 |
| 95 | H | -4.86941 | -4.44768 | -1.56363 |
| 96 | H | -8.06705 | -5.41911 | 1.138334 |
| 97 | H | -7.09593 | -3.58078 | -1.78659 |
| 98 | C | -4.99619 | -0.36755 | 5.047105 |
| 99 | C | -5.78454 | 0.047687 | 6.30316 |
| 100 | C | -5.95814 | -1.03011 | 4.029173 |
| 101 | C | -5.20322 | -1.32594 | 2.700724 |
| 102 | C | -7.35196 | -0.36815 | 3.858454 |
| 103 | C | -5.94656 | -2.44668 | 1.897383 |
| 104 | H | -4.5492 | 0.497888 | 4.604259 |
| 105 | H | -6.18695 | -2.054 | 4.344618 |
| 106 | H | -5.14864 | -0.42051 | 2.095944 |
| 107 | H | -4.18007 | -1.66062 | 2.87422 |
| 108 | H | -7.92785 | -0.85732 | 3.076919 |
| 109 | H | -7.89334 | -0.20943 | 4.794083 |
| 110 | H | -7.30024 | 0.676404 | 3.579296 |
| 111 | H | -6.97 | -2.24457 | 1.57756 |
| 112 | H | -5.46804 | -2.57205 | 0.934374 |
| 113 | H | -5.97642 | -3.41458 | 2.402236 |
| 114 | C | -7.95387 | 3.126311 | -3.52142 |
| 115 | C | -6.53178 | 3.708128 | -3.48301 |
| 116 | C | -6.20429 | 4.305322 | -2.09294 |
| 117 | C | -4.79259 | 4.725712 | -1.84804 |
| 118 | N | -3.88097 | 3.63767 | -2.21686 |
| 119 | C | -2.66899 | 3.688042 | -2.56765 |
| 120 | N | -1.86366 | 4.715656 | -2.20219 |
| 121 | N | -2.14524 | 2.69375 | -3.23735 |
| 122 | H | -8.34241 | 3.067826 | -2.52615 |
| 123 | H | -5.88919 | 2.879542 | -3.78848 |
| 124 | H | -6.54662 | 4.483488 | -4.25884 |
| 125 | H | -6.84507 | 5.156155 | -1.86298 |
| 126 | H | -6.44937 | 3.524764 | -1.36722 |
| 127 | H | -4.57852 | 5.638036 | -2.40062 |
| 128 | H | -4.68834 | 4.795169 | -0.76171 |
| 129 | H | -4.22482 | 2.711645 | -2.39446 |
| 130 | H | -2.23094 | 5.408669 | -1.56459 |
| 131 | H | -0.8978 | 4.8218 | -2.46571 |
| 132 | H | -2.63691 | 1.87235 | -3.57307 |
| 133 | H | -1.20601 | 2.761182 | -3.60037 |
| 134 | C | -1.78059 | -1.45994 | 1.382047 |
| 135 | C | 4.682475 | -6.82365 | 0.209995 |
| 136 | C | -8.31896 | 1.538901 | 0.0416 |
| 137 | C | -0.6353 | 3.413742 | 1.77512 |
| 138 | N | 1.588711 | -0.4443 | 0.291838 |
| 139 | C | -2.46605 | -2.47283 | 0.443684 |
| 140 | C | 3.716215 | -7.75636 | 0.13175 |
| 141 | C | -8.26355 | 2.246919 | 1.179075 |
| 142 | C | -0.23443 | 4.67232 | 0.983601 |
| 143 | N | 5.286476 | -3.31915 | 0.995723 |
| 144 | O | 6.929889 | -4.90078 | 0.681305 |
| 145 | C | -2.15393 | -2.21065 | -1.01437 |
| 146 | C | 1.001474 | 4.498492 | 0.099979 |
| 147 | N | -2.76077 | 1.160476 | -0.2186 |
| 148 | C | -0.29045 | 0.992354 | -0.3786 |
| 149 | C | 3.27437 | -2.03211 | 0.918719 |
| 150 | C | -5.15478 | 1.653544 | 0.291124 |
| 151 | C | 0.543878 | -3.30816 | 2.357864 |
| 152 | C | 2.054754 | -4.96835 | 0.160246 |
| 153 | C | -8.92906 | -0.99652 | -1.7514 |
| 154 | C | -3.75401 | 3.805717 | 2.152074 |
| 155 | C | 0.259613 | -0.19712 | 0.354793 |
| 156 | C | 3.891524 | -3.25107 | 0.883542 |
| 157 | C | -6.36202 | -1.13906 | -1.625 |
| 158 | C | -3.75047 | 1.852289 | 0.440993 |
| 159 | O | -1.32096 | -2.92993 | -1.58207 |
| 160 | O | 2.108015 | 4.437841 | 0.702065 |
| 161 | C | -0.3316 | -1.24228 | 1.076363 |
| 162 | C | 3.433868 | -4.59485 | 0.569479 |
| 163 | C | -7.62221 | -0.46587 | -1.29032 |
| 164 | C | -3.10673 | 2.795733 | 1.266372 |
| 165 | O | -2.72855 | -1.2154 | -1.5922 |
| 166 | O | 0.878514 | 4.518511 | -1.14995 |
| 167 | C | 0.70478 | -2.14667 | 1.437054 |
| 168 | C | 4.544 | -5.41534 | 0.518865 |
| 169 | C | -7.32546 | 0.615298 | -0.49743 |
| 170 | C | -1.70794 | 2.612573 | 1.108343 |
| 171 | C | 1.901223 | -1.6398 | 0.902593 |
| 172 | C | 5.737706 | -4.57894 | 0.744237 |
| 173 | C | -5.86885 | 0.673186 | -0.33698 |
| 174 | C | -1.53695 | 1.59384 | 0.174864 |
| 175 | N | -5.36672 | -0.43217 | -1.01304 |
| 176 | O | -6.19162 | -2.1488 | -2.31924 |
| 177 | H | 2.30423 | 0.198778 | -0.04555 |
| 178 | H | 5.88268 | -2.49578 | 0.86979 |
| 179 | H | -4.38859 | -0.73911 | -1.08263 |
| 180 | H | -2.85819 | 0.323433 | -0.80715 |
| 181 | H | -2.32594 | -0.5097 | 1.365746 |
| 182 | H | -1.88035 | -1.84481 | 2.409903 |
| 183 | H | 0.260152 | 2.797143 | 1.956198 |
| 184 | H | -0.99519 | 3.714129 | 2.770899 |
| 185 | H | -3.55163 | -2.44705 | 0.607899 |
| 186 | H | -2.11522 | -3.48748 | 0.674189 |
| 187 | H | 2.661091 | -7.54689 | 0.316565 |
| 188 | H | 3.979235 | -8.79014 | -0.10802 |
| 189 | H | -7.42473 | 2.186129 | 1.875154 |
| 190 | H | -9.09453 | 2.896326 | 1.464913 |
| 191 | H | 0.018428 | 5.477199 | 1.691088 |
| 192 | H | -1.08371 | 5.014434 | 0.37865 |
| 193 | H | 0.487056 | 1.769888 | -0.42015 |
| 194 | H | -0.47673 | 0.712963 | -1.43005 |
| 195 | H | 1.517071 | -3.71996 | 2.657934 |
| 196 | H | -0.04428 | -4.12721 | 1.914633 |
| 197 | H | 0.012125 | -2.9993 | 3.272474 |
| 198 | H | 1.522421 | -5.52975 | 0.943505 |
| 199 | H | 2.101198 | -5.62463 | -0.72282 |
| 200 | H | 1.447599 | -4.08674 | -0.08251 |
| 201 | H | -8.95683 | -1.06745 | -2.85085 |
| 202 | H | -9.77263 | -0.37749 | -1.42036 |
| 203 | H | -9.07865 | -2.01935 | -1.36763 |
| 204 | H | -3.44313 | 4.829504 | 1.887299 |
| 205 | H | -3.47516 | 3.653251 | 3.20781 |
| 206 | H | -4.85041 | 3.768165 | 2.096295 |
| 207 | H | 5.710723 | -7.1595 | 0.036068 |
| 208 | H | -9.23148 | 1.620343 | -0.55963 |
| 209 | H | 3.961298 | -1.18009 | 0.870547 |
| 210 | H | -5.75993 | 2.424254 | 0.766055 |
| 211 | O | -3.80043 | 0.513525 | -3.54389 |
| 212 | H | -4.38845 | 0.183594 | -4.23309 |
| 213 | H | -3.58065 | -0.26168 | -2.99545 |
| 214 | O | 7.286415 | -8.71579 | -0.88962 |
| 215 | H | 7.546516 | -7.80969 | -1.16362 |
| 216 | H | 6.542913 | -8.90178 | -1.47431 |
| 217 | O | 7.767914 | -6.11059 | -1.55015 |
| 218 | H | 8.669568 | -5.81555 | -1.7225 |
| 219 | H | 7.515587 | -5.66005 | -0.70812 |
| 220 | H | -3.55206 | -6.15319 | 3.944553 |
| 221 | H | -2.02387 | -6.71142 | 3.30732 |
| 222 | H | -4.2311 | -1.06393 | 5.320227 |
| 223 | H | -6.65114 | -0.57219 | 6.401465 |
| 224 | H | -5.16432 | -0.06666 | 7.167537 |
| 225 | H | -6.08592 | 1.070417 | 6.213195 |
| 226 | H | -8.58222 | 3.758977 | -4.11292 |
| 227 | H | -7.92713 | 2.147125 | -3.95198 |
| 228 | H | 6.992634 | -4.0658 | -2.65694 |
| 229 | H | 6.644577 | -3.15053 | -4.10408 |
| 230 | H | 7.685037 | -2.47615 | -2.87293 |
| 231 | H | 4.141904 | 6.424759 | 3.892451 |

**Table 10. Optimized ground-state atomic coordinates of the QM cluster model for the IB site (including BR, water molecules, and residues truncated at Cα with methyl caps) derived from snapshot 2.**

| **Atomic number** | **Element** | **X** | **Y** | **Z** |
| --- | --- | --- | --- | --- |
| 1 | O | -2.5511 | -1.92859 | -0.52727 |
| 2 | H | -2.34734 | -2.44636 | 0.281616 |
| 3 | H | -3.52692 | -1.89874 | -0.49352 |
| 4 | C | -5.75983 | -4.4862 | 3.816354 |
| 5 | C | -5.63245 | -2.96151 | 3.670341 |
| 6 | O | -6.51802 | -2.33504 | 4.160645 |
| 7 | C | -6.90789 | -5.09565 | 2.97456 |
| 8 | C | -6.8347 | -4.92521 | 1.445445 |
| 9 | C | -5.55352 | -5.28471 | 0.79114 |
| 10 | N | -5.59261 | -4.93902 | -0.66195 |
| 11 | C | -4.59109 | -4.73402 | -1.43491 |
| 12 | N | -3.36643 | -5.10076 | -1.27201 |
| 13 | N | -4.93913 | -4.19563 | -2.60482 |
| 14 | H | -4.83775 | -4.93663 | 3.513386 |
| 15 | H | -7.01998 | -6.17248 | 3.049938 |
| 16 | H | -7.8399 | -4.62067 | 3.296996 |
| 17 | H | -7.60662 | -5.61744 | 1.101403 |
| 18 | H | -7.09256 | -3.92233 | 1.088871 |
| 19 | H | -4.72872 | -4.75706 | 1.262524 |
| 20 | H | -5.36802 | -6.34214 | 0.974546 |
| 21 | H | -6.45351 | -4.75289 | -1.14444 |
| 22 | H | -3.10258 | -5.46263 | -0.36444 |
| 23 | H | -2.66179 | -4.85593 | -1.94923 |
| 24 | H | -5.8967 | -3.89107 | -2.63495 |
| 25 | H | -4.26695 | -4.1044 | -3.35738 |
| 26 | N | -4.65134 | -2.4174 | 2.925373 |
| 27 | C | -4.77792 | -1.05619 | 2.418538 |
| 28 | C | -5.41381 | -0.97607 | 1.026467 |
| 29 | O | -5.26414 | -1.84958 | 0.156906 |
| 30 | C | -3.46017 | -0.37919 | 2.376974 |
| 31 | C | -2.77374 | -0.06683 | 3.763369 |
| 32 | C | -1.48347 | 0.618999 | 3.396184 |
| 33 | C | -3.48492 | 0.943805 | 4.675408 |
| 34 | H | -3.82587 | -2.90374 | 2.601504 |
| 35 | H | -5.48986 | -0.50565 | 3.029955 |
| 36 | H | -2.9277 | -1.00346 | 1.65815 |
| 37 | H | -3.6104 | 0.591578 | 1.891265 |
| 38 | H | -2.47599 | -1.00345 | 4.231392 |
| 39 | H | -1.04118 | 0.02271 | 2.605164 |
| 40 | H | -1.65263 | 1.644237 | 3.071724 |
| 41 | H | -0.81464 | 0.608358 | 4.255923 |
| 42 | H | -2.88406 | 1.151255 | 5.555482 |
| 43 | H | -3.77667 | 1.850372 | 4.136965 |
| 44 | H | -4.46406 | 0.581918 | 5.013222 |
| 45 | N | -6.13678 | 0.134583 | 0.727554 |
| 46 | C | -6.92112 | 0.345941 | -0.56011 |
| 47 | C | -6.56789 | 1.762873 | -0.91493 |
| 48 | O | -6.70758 | 2.6489 | -0.07258 |
| 49 | C | -8.40588 | 0.068282 | -0.32276 |
| 50 | C | -9.25456 | 0.411571 | -1.54014 |
| 51 | C | -8.75025 | -1.39932 | 0.118311 |
| 52 | H | -6.31822 | 0.847676 | 1.411388 |
| 53 | H | -6.55647 | -0.32417 | -1.34043 |
| 54 | H | -8.88213 | 0.669611 | 0.443321 |
| 55 | H | -10.2626 | 0.598036 | -1.18051 |
| 56 | H | -8.91355 | 1.277834 | -2.09817 |
| 57 | H | -9.39717 | -0.44429 | -2.20072 |
| 58 | H | -9.84037 | -1.45265 | 0.208382 |
| 59 | H | -8.3407 | -2.01925 | -0.68103 |
| 60 | H | -8.29834 | -1.71226 | 1.055937 |
| 61 | N | -6.07903 | 2.043336 | -2.12176 |
| 62 | C | -5.68376 | 3.381032 | -2.62229 |
| 63 | C | -6.9457 | 4.223622 | -2.98345 |
| 64 | C | -4.71237 | 3.094247 | -3.75444 |
| 65 | C | -3.35106 | 2.50192 | -3.28151 |
| 66 | C | -2.54002 | 2.13889 | -4.5155 |
| 67 | N | -1.15106 | 1.548245 | -4.20421 |
| 68 | C | -0.57415 | 0.545772 | -4.87559 |
| 69 | N | -1.24875 | -0.15088 | -5.72206 |
| 70 | N | 0.685514 | 0.332176 | -4.68118 |
| 71 | H | -6.02894 | 1.265363 | -2.75228 |
| 72 | H | -5.18236 | 3.910929 | -1.81031 |
| 73 | H | -5.11966 | 2.385977 | -4.47795 |
| 74 | H | -4.58606 | 4.080221 | -4.20444 |
| 75 | H | -2.7791 | 3.219704 | -2.68005 |
| 76 | H | -3.4556 | 1.534377 | -2.78923 |
| 77 | H | -3.15744 | 1.400278 | -5.01113 |
| 78 | H | -2.34786 | 3.049461 | -5.08245 |
| 79 | H | -0.4775 | 2.014234 | -3.61152 |
| 80 | H | -2.20632 | 0.058998 | -5.97587 |
| 81 | H | -0.7503 | -0.87511 | -6.2023 |
| 82 | H | 1.229391 | 0.861091 | -4.011 |
| 83 | H | 1.123527 | -0.36236 | -5.26142 |
| 84 | C | 4.206451 | 6.064656 | 2.972735 |
| 85 | C | 4.888234 | 6.579767 | 1.699185 |
| 86 | C | 5.825888 | 5.59334 | 1.029057 |
| 87 | C | 5.408028 | 4.819154 | -0.1145 |
| 88 | C | 7.167618 | 5.354582 | 1.499857 |
| 89 | C | 6.288338 | 4.02737 | -0.81159 |
| 90 | C | 8.015224 | 4.482492 | 0.871189 |
| 91 | C | 7.623371 | 3.76136 | -0.29707 |
| 92 | O | 8.34927 | 2.801395 | -0.84606 |
| 93 | H | 3.230762 | 5.697614 | 2.731463 |
| 94 | H | 4.112763 | 6.858274 | 0.978647 |
| 95 | H | 5.454454 | 7.481601 | 1.920522 |
| 96 | H | 4.411458 | 4.955447 | -0.48649 |
| 97 | H | 7.569082 | 5.87158 | 2.357083 |
| 98 | H | 5.839202 | 3.482231 | -1.62963 |
| 99 | H | 8.954549 | 4.16949 | 1.309479 |
| 100 | H | 7.899141 | 2.371283 | -1.56705 |
| 101 | C | 5.666409 | 0.32772 | 5.403907 |
| 102 | C | 6.424546 | -0.08561 | 6.679052 |
| 103 | C | 6.624542 | 0.852474 | 4.409713 |
| 104 | C | 5.936952 | 0.668583 | 2.986809 |
| 105 | C | 7.991377 | 0.070046 | 4.451685 |
| 106 | C | 6.487474 | 1.714539 | 2.067423 |
| 107 | H | 5.161184 | -0.5235 | 4.997625 |
| 108 | H | 6.912413 | 1.862051 | 4.698996 |
| 109 | H | 5.948521 | -0.33091 | 2.548341 |
| 110 | H | 4.903136 | 0.950688 | 3.164187 |
| 111 | H | 8.617785 | 0.375116 | 3.608153 |
| 112 | H | 8.573622 | 0.309041 | 5.339419 |
| 113 | H | 7.8145 | -0.99673 | 4.537116 |
| 114 | H | 6.000813 | 1.660476 | 1.094665 |
| 115 | H | 6.202832 | 2.68444 | 2.486627 |
| 116 | H | 7.558702 | 1.612772 | 1.891492 |
| 117 | C | 7.040937 | -3.90225 | -3.81212 |
| 118 | C | 5.570622 | -4.44877 | -3.82935 |
| 119 | C | 5.074761 | -4.70523 | -2.4118 |
| 120 | C | 3.636628 | -5.19213 | -2.40072 |
| 121 | N | 2.570121 | -4.23036 | -2.89539 |
| 122 | C | 1.234781 | -4.43305 | -2.943 |
| 123 | N | 0.702541 | -5.42703 | -2.3748 |
| 124 | N | 0.505566 | -3.62497 | -3.6556 |
| 125 | H | 7.276788 | -3.54393 | -2.83187 |
| 126 | H | 4.961896 | -3.64271 | -4.2412 |
| 127 | H | 5.439927 | -5.25676 | -4.5406 |
| 128 | H | 5.766894 | -5.35153 | -1.88071 |
| 129 | H | 5.147027 | -3.78194 | -1.83431 |
| 130 | H | 3.518555 | -6.16489 | -2.88566 |
| 131 | H | 3.310755 | -5.31311 | -1.37572 |
| 132 | H | 2.818971 | -3.3416 | -3.31165 |
| 133 | H | 1.221739 | -6.05352 | -1.78477 |
| 134 | H | -0.25054 | -5.70424 | -2.56076 |
| 135 | H | 0.967182 | -2.84333 | -4.11802 |
| 136 | H | -0.49978 | -3.59194 | -3.56479 |
| 137 | C | 2.714561 | 1.151975 | 0.245698 |
| 138 | C | -3.73251 | 6.980626 | 0.153254 |
| 139 | C | 8.564751 | -2.50103 | 0.94901 |
| 140 | C | 0.541271 | -3.23873 | 1.664291 |
| 141 | N | -0.81646 | 0.34737 | -0.47515 |
| 142 | C | 3.495297 | 1.76484 | -0.92835 |
| 143 | C | -2.85717 | 7.919527 | -0.24603 |
| 144 | C | 8.223828 | -2.92125 | 2.175324 |
| 145 | C | -0.19013 | -4.43202 | 1.054256 |
| 146 | N | -4.03106 | 3.491995 | 1.085355 |
| 147 | O | -5.47346 | 5.148976 | 1.779267 |
| 148 | C | 3.19347 | 1.07065 | -2.23767 |
| 149 | C | -1.67335 | -4.544 | 1.39803 |
| 150 | N | 3.234007 | -1.95191 | -0.47067 |
| 151 | C | 0.868278 | -1.38319 | -0.94584 |
| 152 | C | -2.27325 | 2.145055 | 0.19298 |
| 153 | C | 5.445793 | -2.55248 | 0.487743 |
| 154 | C | 0.678623 | 3.435196 | 0.880979 |
| 155 | C | -1.34963 | 5.10231 | -0.90622 |
| 156 | C | 9.686002 | -0.23489 | -0.95101 |
| 157 | C | 3.526659 | -4.07697 | 2.528269 |
| 158 | C | 0.484354 | -0.0188 | -0.44647 |
| 159 | C | -2.8041 | 3.391053 | 0.42646 |
| 160 | C | 7.159881 | -0.0643 | -1.4769 |
| 161 | C | 4.021086 | -2.61847 | 0.436654 |
| 162 | O | 2.461277 | 1.645148 | -3.06668 |
| 163 | O | -2.24056 | -5.63247 | 1.200507 |
| 164 | C | 1.234393 | 1.071003 | 0.024314 |
| 165 | C | -2.46122 | 4.736243 | 0.0065 |
| 166 | C | 8.285452 | -0.69407 | -0.77425 |
| 167 | C | 3.146753 | -3.24615 | 1.349272 |
| 168 | O | 3.67078 | -0.09264 | -2.43208 |
| 169 | O | -2.25604 | -3.47912 | 1.785424 |
| 170 | C | 0.324278 | 2.129453 | 0.264937 |
| 171 | C | -3.47935 | 5.579046 | 0.422858 |
| 172 | C | 7.773342 | -1.66911 | 0.045476 |
| 173 | C | 1.824502 | -2.88396 | 0.982741 |
| 174 | C | -0.96564 | 1.657513 | -0.06003 |
| 175 | C | -4.45568 | 4.776382 | 1.166702 |
| 176 | C | 6.320419 | -1.71046 | -0.1406 |
| 177 | C | 1.924273 | -2.08501 | -0.15629 |
| 178 | N | 6.029877 | -0.71776 | -1.06984 |
| 179 | O | 7.171712 | 0.884385 | -2.27275 |
| 180 | H | -1.5782 | -0.33205 | -0.62477 |
| 181 | H | -4.54758 | 2.745306 | 1.545885 |
| 182 | H | 5.129062 | -0.49655 | -1.51528 |
| 183 | H | 3.531821 | -1.35133 | -1.24534 |
| 184 | H | 3.121869 | 0.161274 | 0.479641 |
| 185 | H | 2.915851 | 1.772928 | 1.132921 |
| 186 | H | -0.1376 | -2.37305 | 1.621557 |
| 187 | H | 0.714089 | -3.42244 | 2.735902 |
| 188 | H | 4.573351 | 1.70101 | -0.71887 |
| 189 | H | 3.234429 | 2.826366 | -1.03692 |
| 190 | H | -1.7919 | 7.718555 | -0.37634 |
| 191 | H | -3.19484 | 8.941456 | -0.43649 |
| 192 | H | 7.276115 | -2.65189 | 2.64705 |
| 193 | H | 8.914185 | -3.52946 | 2.764959 |
| 194 | H | 0.302393 | -5.38736 | 1.291797 |
| 195 | H | -0.1609 | -4.35914 | -0.04811 |
| 196 | H | -0.04371 | -1.99673 | -0.977 |
| 197 | H | 1.202614 | -1.29443 | -1.99299 |
| 198 | H | 1.065952 | 4.149159 | 0.137257 |
| 199 | H | 1.461908 | 3.306368 | 1.643781 |
| 200 | H | -0.1947 | 3.900772 | 1.36013 |
| 201 | H | -1.7338 | 5.752637 | -1.70961 |
| 202 | H | -0.85864 | 4.23213 | -1.35944 |
| 203 | H | -0.57216 | 5.683584 | -0.3858 |
| 204 | H | 10.40163 | -0.87744 | -0.42162 |
| 205 | H | 9.803102 | 0.795942 | -0.57986 |
| 206 | H | 9.956108 | -0.21487 | -2.01899 |
| 207 | H | 3.298257 | -3.56149 | 3.476187 |
| 208 | H | 4.598314 | -4.31914 | 2.537104 |
| 209 | H | 2.971555 | -5.02801 | 2.542061 |
| 210 | H | -4.78477 | 7.261617 | 0.278889 |
| 211 | H | 9.562318 | -2.76267 | 0.577024 |
| 212 | H | -3.00619 | 1.340339 | 0.303772 |
| 213 | H | 5.906529 | -3.25881 | 1.177591 |
| 214 | O | -1.38621 | -3.08365 | 4.39164 |
| 215 | H | -1.65772 | -3.13032 | 3.452662 |
| 216 | H | -2.16686 | -3.4012 | 4.858935 |
| 217 | O | -6.40658 | 2.63973 | 2.558262 |
| 218 | H | -6.13244 | 3.571076 | 2.661317 |
| 219 | H | -6.73405 | 2.674124 | 1.633349 |
| 220 | O | 0.530483 | 3.367709 | -2.81301 |
| 221 | H | 0.681474 | 4.015407 | -3.512 |
| 222 | H | 1.369533 | 2.848156 | -2.77564 |
| 223 | O | 2.752035 | -1.75864 | -4.28598 |
| 224 | H | 3.126222 | -1.05853 | -3.68226 |
| 225 | H | 3.348788 | -1.79332 | -5.04337 |
| 226 | O | -7.15144 | 6.497512 | 0.063444 |
| 227 | H | -6.62204 | 6.019362 | 0.733434 |
| 228 | H | -7.42368 | 7.295169 | 0.53038 |
| 229 | H | 4.122324 | 6.863039 | 3.68013 |
| 230 | H | 4.790598 | 5.273934 | 3.395144 |
| 231 | H | 7.716803 | -4.68846 | -4.07666 |
| 232 | H | 7.132121 | -3.1016 | -4.51606 |
| 233 | H | 4.950811 | 1.085996 | 5.644408 |
| 234 | H | 7.390613 | 0.374374 | 6.684524 |
| 235 | H | 5.873774 | 0.231232 | 7.539962 |
| 236 | H | 6.536005 | -1.1496 | 6.698645 |
| 237 | H | -6.64137 | 5.164106 | -3.39305 |
| 238 | H | -7.53375 | 3.694369 | -3.70386 |
| 239 | H | -7.52768 | 4.390403 | -2.10119 |
| 240 | H | -5.93176 | -4.71752 | 4.846804 |

**Table 11. Optimized ground-state atomic coordinates of the QM cluster model for the IB site (including BR, water molecules, and residues truncated at Cα with methyl caps) derived from snapshot 3.**

| **Atomic number** | **Element** | **X** | **Y** | **Z** |
| --- | --- | --- | --- | --- |
| 1 | C | 5.945669 | -4.20196 | -3.25811 |
| 2 | C | 5.218488 | -2.90336 | -2.78087 |
| 3 | O | 4.314888 | -3.0118 | -1.94138 |
| 4 | C | 7.164272 | -4.5589 | -2.35004 |
| 5 | C | 6.877986 | -4.90104 | -0.90606 |
| 6 | C | 8.27403 | -5.23005 | -0.21851 |
| 7 | N | 8.421631 | -6.66874 | 0.016822 |
| 8 | C | 9.121275 | -7.32012 | 0.911247 |
| 9 | N | 9.855986 | -6.88565 | 1.899342 |
| 10 | N | 9.086248 | -8.64187 | 0.878867 |
| 11 | H | 5.250503 | -5.01521 | -3.24204 |
| 12 | H | 7.72037 | -5.3905 | -2.79196 |
| 13 | H | 7.851503 | -3.72216 | -2.4683 |
| 14 | H | 6.35211 | -4.07907 | -0.43106 |
| 15 | H | 6.253062 | -5.77161 | -0.71247 |
| 16 | H | 9.103572 | -4.71293 | -0.69898 |
| 17 | H | 8.182673 | -4.90087 | 0.813475 |
| 18 | H | 7.812309 | -7.24398 | -0.55539 |
| 19 | H | 10.02351 | -5.90763 | 2.067336 |
| 20 | H | 10.20412 | -7.59629 | 2.520212 |
| 21 | H | 8.463899 | -9.1151 | 0.242444 |
| 22 | H | 9.683202 | -9.24815 | 1.429752 |
| 23 | N | 5.720342 | -1.6787 | -3.21545 |
| 24 | C | 5.213769 | -0.34596 | -2.99033 |
| 25 | C | 5.014956 | 0.007691 | -1.50524 |
| 26 | O | 3.919842 | 0.281876 | -1.03253 |
| 27 | C | 4.011635 | -0.05507 | -3.85408 |
| 28 | C | 3.432836 | 1.396535 | -3.89421 |
| 29 | C | 4.143554 | 2.339934 | -4.86157 |
| 30 | C | 1.974051 | 1.452801 | -4.19565 |
| 31 | H | 6.481166 | -1.83246 | -3.86476 |
| 32 | H | 5.898282 | 0.434128 | -3.30705 |
| 33 | H | 4.361519 | -0.15549 | -4.88033 |
| 34 | H | 3.171118 | -0.69853 | -3.59388 |
| 35 | H | 3.668423 | 1.890858 | -2.94961 |
| 36 | H | 3.799526 | 3.375887 | -4.86839 |
| 37 | H | 5.210269 | 2.453811 | -4.65724 |
| 38 | H | 3.917357 | 1.917073 | -5.83626 |
| 39 | H | 1.852597 | 1.018661 | -5.1877 |
| 40 | H | 1.492446 | 0.784029 | -3.48164 |
| 41 | H | 1.5498 | 2.450903 | -4.02831 |
| 42 | N | 6.117074 | -0.03289 | -0.77967 |
| 43 | C | 6.209857 | 0.173018 | 0.695076 |
| 44 | C | 5.822013 | 1.646692 | 0.98953 |
| 45 | O | 6.196731 | 2.630087 | 0.327891 |
| 46 | C | 7.595353 | -0.14199 | 1.199959 |
| 47 | C | 7.696096 | -0.15094 | 2.735008 |
| 48 | C | 8.356234 | -1.38797 | 0.592351 |
| 49 | H | 6.925218 | -0.24831 | -1.35106 |
| 50 | H | 5.549643 | -0.52998 | 1.205704 |
| 51 | H | 8.218736 | 0.704344 | 0.891875 |
| 52 | H | 7.386103 | 0.820124 | 3.119635 |
| 53 | H | 7.091048 | -0.89877 | 3.239461 |
| 54 | H | 8.731613 | -0.35666 | 3.004795 |
| 55 | H | 7.689868 | -2.19646 | 0.282519 |
| 56 | H | 8.793476 | -1.20349 | -0.39146 |
| 57 | H | 9.14703 | -1.73103 | 1.260448 |
| 58 | N | 5.069041 | 1.905088 | 2.075654 |
| 59 | C | 4.623414 | 3.241046 | 2.533397 |
| 60 | C | 5.815615 | 4.066321 | 3.090241 |
| 61 | C | 3.521088 | 3.136999 | 3.507385 |
| 62 | C | 2.182882 | 2.595033 | 2.939691 |
| 63 | C | 1.460408 | 2.113903 | 4.273128 |
| 64 | N | 0.017113 | 1.718031 | 4.122197 |
| 65 | C | -0.74909 | 1.146791 | 5.049076 |
| 66 | N | -0.24449 | 0.885689 | 6.177923 |
| 67 | N | -1.94448 | 0.727241 | 4.843073 |
| 68 | H | 4.520231 | 1.11822 | 2.408638 |
| 69 | H | 4.198838 | 3.758137 | 1.675052 |
| 70 | H | 3.901877 | 2.359336 | 4.178685 |
| 71 | H | 3.526102 | 4.088524 | 4.03689 |
| 72 | H | 1.646218 | 3.422112 | 2.476624 |
| 73 | H | 2.228315 | 1.827139 | 2.157532 |
| 74 | H | 1.89791 | 1.162611 | 4.569924 |
| 75 | H | 1.493307 | 2.907906 | 5.015503 |
| 76 | H | -0.45112 | 1.848248 | 3.236223 |
| 77 | H | 0.678369 | 1.203204 | 6.418808 |
| 78 | H | -0.8276 | 0.386181 | 6.843486 |
| 79 | H | -2.50143 | 1.14693 | 4.107569 |
| 80 | H | -2.3946 | 0.225572 | 5.598134 |
| 81 | C | -5.31767 | 4.835181 | -4.05808 |
| 82 | C | -6.24625 | 5.413019 | -2.96266 |
| 83 | C | -6.86214 | 4.368602 | -2.06602 |
| 84 | C | -6.19776 | 3.880608 | -0.93758 |
| 85 | C | -8.17922 | 3.859585 | -2.38944 |
| 86 | C | -6.78105 | 3.005076 | -0.05179 |
| 87 | C | -8.76864 | 2.98318 | -1.47108 |
| 88 | C | -8.14937 | 2.713164 | -0.23795 |
| 89 | O | -8.78964 | 2.037154 | 0.682373 |
| 90 | H | -5.63417 | 5.983811 | -2.26728 |
| 91 | H | -7.05876 | 6.010529 | -3.38565 |
| 92 | H | -5.19557 | 4.230201 | -0.70543 |
| 93 | H | -8.73811 | 4.324312 | -3.19472 |
| 94 | H | -6.18553 | 2.763445 | 0.806167 |
| 95 | H | -9.78798 | 2.659236 | -1.6045 |
| 96 | H | -8.29092 | 1.775134 | 1.450682 |
| 97 | C | -5.28833 | -1.6072 | -5.39246 |
| 98 | C | -6.08943 | -2.1909 | -6.57107 |
| 99 | C | -6.27549 | -1.11207 | -4.28573 |
| 100 | C | -5.70491 | -0.51873 | -2.96835 |
| 101 | C | -7.18679 | -2.34659 | -4.04537 |
| 102 | C | -6.68765 | 0.044761 | -1.99406 |
| 103 | H | -4.64821 | -2.36284 | -4.9873 |
| 104 | H | -6.94559 | -0.41897 | -4.79287 |
| 105 | H | -5.09643 | -1.31235 | -2.54303 |
| 106 | H | -4.99968 | 0.271848 | -3.20722 |
| 107 | H | -7.86445 | -2.56971 | -4.87279 |
| 108 | H | -6.48381 | -3.17623 | -3.92539 |
| 109 | H | -7.92488 | -2.22731 | -3.24836 |
| 110 | H | -6.1933 | 0.588422 | -1.18642 |
| 111 | H | -7.35508 | 0.615039 | -2.64207 |
| 112 | H | -7.21682 | -0.76403 | -1.47076 |
| 113 | C | -7.41318 | -2.89756 | 4.881432 |
| 114 | C | -5.83003 | -2.75531 | 5.015161 |
| 115 | C | -5.16556 | -3.60558 | 3.95477 |
| 116 | C | -3.78996 | -3.1406 | 3.640434 |
| 117 | N | -3.32863 | -3.91469 | 2.491541 |
| 118 | C | -2.03105 | -4.22251 | 2.099076 |
| 119 | N | -0.97707 | -3.71343 | 2.563124 |
| 120 | N | -1.92927 | -5.18225 | 1.252053 |
| 121 | H | -7.78292 | -2.15095 | 4.210035 |
| 122 | H | -5.43838 | -1.73766 | 4.971745 |
| 123 | H | -5.61453 | -3.13999 | 6.006367 |
| 124 | H | -5.13621 | -4.6521 | 4.270247 |
| 125 | H | -5.64756 | -3.58445 | 2.974244 |
| 126 | H | -3.76628 | -2.11614 | 3.279133 |
| 127 | H | -3.22106 | -3.19212 | 4.56596 |
| 128 | H | -4.01519 | -4.3658 | 1.914182 |
| 129 | H | -1.07 | -3.08522 | 3.351051 |
| 130 | H | -0.03857 | -3.86518 | 2.22979 |
| 131 | H | -2.78864 | -5.56209 | 0.898453 |
| 132 | H | -1.00913 | -5.54133 | 1.016865 |
| 133 | O | 5.992373 | 3.841029 | -1.95157 |
| 134 | H | 6.370471 | 3.48216 | -2.76104 |
| 135 | H | 6.175423 | 3.194026 | -1.23056 |
| 136 | O | -4.7992 | 0.444452 | 4.040314 |
| 137 | H | -5.63124 | 0.541608 | 3.541656 |
| 138 | H | -4.16694 | 0.29569 | 3.307793 |
| 139 | C | -2.31366 | 1.372181 | -0.93615 |
| 140 | C | 2.136695 | 8.004095 | 0.755167 |
| 141 | C | -7.54355 | -3.91481 | -0.09489 |
| 142 | C | 0.375109 | -2.90105 | -1.79424 |
| 143 | N | 1.295115 | 1.123769 | -0.20437 |
| 144 | C | -3.10902 | 2.076819 | 0.172049 |
| 145 | C | 0.959233 | 8.439497 | 1.238568 |
| 146 | C | -7.24173 | -4.60658 | -1.20235 |
| 147 | C | 0.991619 | -4.25929 | -1.43898 |
| 148 | N | 3.776985 | 5.187215 | -0.85798 |
| 149 | O | 4.688823 | 7.290121 | -0.62994 |
| 150 | C | -2.80849 | 1.530467 | 1.554982 |
| 151 | C | 0.941886 | -4.59098 | 0.048391 |
| 152 | N | -2.44442 | -1.68636 | 0.221576 |
| 153 | C | -0.15896 | -0.75602 | 0.493223 |
| 154 | C | 2.432184 | 3.202547 | -0.76557 |
| 155 | C | -4.52822 | -2.91422 | -0.35775 |
| 156 | C | -0.60909 | 3.826182 | -1.82681 |
| 157 | C | 0.43634 | 5.281015 | 0.787755 |
| 158 | C | -9.06154 | -1.63141 | 1.458474 |
| 159 | C | -2.48225 | -4.334 | -2.35001 |
| 160 | C | 0.057521 | 0.561281 | -0.19251 |
| 161 | C | 2.575254 | 4.546295 | -0.55312 |
| 162 | C | -6.67001 | -0.68266 | 1.498685 |
| 163 | C | -3.14272 | -2.61862 | -0.51235 |
| 164 | O | -2.17532 | 2.223256 | 2.367721 |
| 165 | O | 1.227477 | -3.70716 | 0.881169 |
| 166 | C | -0.83126 | 1.483773 | -0.75544 |
| 167 | C | 1.734884 | 5.535826 | 0.110541 |
| 168 | C | -7.61725 | -1.73385 | 1.130152 |
| 169 | C | -2.21144 | -3.22893 | -1.3867 |
| 170 | O | -3.23488 | 0.354019 | 1.821779 |
| 171 | O | 0.573893 | -5.76559 | 0.366074 |
| 172 | C | -0.08347 | 2.648257 | -1.08011 |
| 173 | C | 2.445162 | 6.718555 | 0.160103 |
| 174 | C | -6.93356 | -2.68786 | 0.412586 |
| 175 | C | -0.95345 | -2.61403 | -1.15966 |
| 176 | C | 1.244033 | 2.410223 | -0.69605 |
| 177 | C | 3.756318 | 6.485015 | -0.4713 |
| 178 | C | -5.53599 | -2.26205 | 0.306102 |
| 179 | C | -1.14624 | -1.6692 | -0.15016 |
| 180 | N | -5.45459 | -1.0558 | 0.998545 |
| 181 | O | -6.89617 | 0.359937 | 2.139582 |
| 182 | H | 2.173153 | 0.638643 | -0.03069 |
| 183 | H | 4.556969 | 4.738351 | -1.35675 |
| 184 | H | -4.61772 | -0.46967 | 1.146011 |
| 185 | H | -2.81219 | -1.01762 | 0.91329 |
| 186 | H | -2.6244 | 0.322244 | -1.002 |
| 187 | H | -2.59724 | 1.831505 | -1.89715 |
| 188 | H | 1.078174 | -2.1059 | -1.50395 |
| 189 | H | 0.293161 | -2.83921 | -2.89336 |
| 190 | H | -4.18399 | 1.946483 | -0.02634 |
| 191 | H | -2.88718 | 3.153402 | 0.172158 |
| 192 | H | 0.046378 | 7.842004 | 1.224936 |
| 193 | H | 0.881035 | 9.446254 | 1.656963 |
| 194 | H | -6.4743 | -4.28999 | -1.90999 |
| 195 | H | -7.79851 | -5.5127 | -1.4538 |
| 196 | H | 2.049082 | -4.25798 | -1.75479 |
| 197 | H | 0.48589 | -5.0693 | -1.98145 |
| 198 | H | 0.793812 | -1.30159 | 0.569333 |
| 199 | H | -0.48104 | -0.56437 | 1.532293 |
| 200 | H | -1.37761 | 4.377108 | -1.26224 |
| 201 | H | -1.08304 | 3.502868 | -2.76826 |
| 202 | H | 0.192315 | 4.534668 | -2.07689 |
| 203 | H | 0.204982 | 4.21148 | 0.855965 |
| 204 | H | -0.39948 | 5.761639 | 0.255223 |
| 205 | H | 0.454123 | 5.713626 | 1.800584 |
| 206 | H | -9.463 | -0.67513 | 1.084999 |
| 207 | H | -9.2303 | -1.63801 | 2.547675 |
| 208 | H | -9.64726 | -2.44711 | 1.015372 |
| 209 | H | -2.04119 | -5.28539 | -2.00394 |
| 210 | H | -2.0378 | -4.11425 | -3.33439 |
| 211 | H | -3.55848 | -4.49507 | -2.50573 |
| 212 | H | 2.989084 | 8.692753 | 0.786923 |
| 213 | H | -8.3759 | -4.28243 | 0.516371 |
| 214 | H | 3.353519 | 2.653582 | -0.99278 |
| 215 | H | -4.84088 | -3.82603 | -0.86563 |
| 216 | O | 5.093879 | 9.682554 | 0.646054 |
| 217 | H | 5.257366 | 9.329992 | 1.528459 |
| 218 | H | 4.948384 | 8.867651 | 0.122741 |
| 219 | O | -0.84779 | -7.24017 | -1.35846 |
| 220 | H | -0.24208 | -6.72003 | -0.77273 |
| 221 | H | -0.42129 | -7.20707 | -2.22103 |
| 222 | O | 7.106355 | 5.939859 | -0.30025 |
| 223 | H | 6.916185 | 5.220234 | -0.9232 |
| 224 | H | 6.337584 | 6.523472 | -0.43516 |
| 225 | H | -4.32286 | 5.201054 | -3.9118 |
| 226 | H | -5.3172 | 3.766863 | -3.99815 |
| 227 | H | -5.67107 | 5.138204 | -5.02151 |
| 228 | H | -4.69626 | -0.78486 | -5.73612 |
| 229 | H | -5.4773 | -2.20006 | -7.44863 |
| 230 | H | -6.39183 | -3.19016 | -6.33669 |
| 231 | H | -6.95579 | -1.58803 | -6.7468 |
| 232 | H | 6.290007 | -4.05864 | -4.261 |
| 233 | H | 5.870779 | 5.003855 | 2.577515 |
| 234 | H | 5.671669 | 4.239769 | 4.136231 |
| 235 | H | 6.725692 | 3.523865 | 2.94058 |
| 236 | H | -7.86535 | -2.76834 | 5.842549 |
| 237 | H | -7.65324 | -3.8688 | 4.502005 |

**Table 12. Optimized ground-state atomic coordinates of the lumirubin (LR), (solvent=water).**

| **Atomic number** | **Element** | **X** | **Y** | **Z** |
| --- | --- | --- | --- | --- |
| 1 | C | 5.203768 | -2.34058 | -2.541211 |
| 2 | C | 3.595477 | -2.387361 | -0.77372 |
| 3 | C | 3.851266 | -0.999075 | -1.206155 |
| 4 | N | 4.76836 | -1.076252 | -2.250343 |
| 5 | H | 5.125495 | -0.261424 | -2.738758 |
| 6 | C | 5.43604 | -4.188645 | -0.848908 |
| 7 | H | 4.890558 | -4.916783 | -0.233303 |
| 8 | H | 6.07881 | -4.7388 | -1.550138 |
| 9 | H | 6.075868 | -3.587857 | -0.185628 |
| 10 | C | 2.714185 | -2.826121 | 0.132065 |
| 11 | H | 2.629229 | -3.913434 | 0.230278 |
| 12 | O | 6.036344 | -2.621068 | -3.374374 |
| 13 | C | 3.310433 | 0.16672 | -0.791313 |
| 14 | H | 3.554479 | 1.085398 | -1.328765 |
| 15 | C | 2.395235 | 0.322028 | 0.312893 |
| 16 | C | 2.215743 | -0.652332 | 1.467558 |
| 17 | N | 1.68585 | 1.392639 | 0.453734 |
| 18 | C | 1.141536 | 0.083052 | 2.2644 |
| 19 | C | 0.92792 | 1.259156 | 1.63555 |
| 20 | C | 3.521964 | -0.70826 | 2.280792 |
| 21 | H | 4.341996 | -1.134841 | 1.687552 |
| 22 | H | 3.816123 | 0.300075 | 2.604884 |
| 23 | H | 3.38548 | -1.332397 | 3.176398 |
| 24 | C | 0.571928 | -0.354055 | 3.582191 |
| 25 | H | 1.394007 | -0.506568 | 4.301123 |
| 26 | H | -0.033039 | 0.467258 | 3.988266 |
| 27 | C | 0.018018 | 2.40514 | 1.974044 |
| 28 | H | -0.533171 | 2.198612 | 2.901669 |
| 29 | H | 0.627905 | 3.30495 | 2.127422 |
| 30 | C | -0.2793 | -1.627812 | 3.6005 |
| 31 | H | 0.295579 | -2.535416 | 3.382688 |
| 32 | H | -0.677731 | -1.775307 | 4.618359 |
| 33 | C | -1.475882 | -1.600297 | 2.689844 |
| 34 | O | -1.991922 | -0.550894 | 2.319367 |
| 35 | O | -1.920795 | -2.77913 | 2.359774 |
| 36 | H | -2.760954 | -2.767003 | 1.77183 |
| 37 | C | -0.932887 | 2.650478 | 0.844081 |
| 38 | C | -1.0092 | 3.66581 | -0.102694 |
| 39 | N | -1.868796 | 1.716847 | 0.546701 |
| 40 | C | -2.047739 | 3.31009 | -1.005132 |
| 41 | C | -2.573129 | 2.078952 | -0.58418 |
| 42 | H | -1.976723 | 0.890846 | 1.128215 |
| 43 | C | -3.590633 | 1.301038 | -1.221626 |
| 44 | H | -4.046489 | 1.776958 | -2.090511 |
| 45 | C | -4.040464 | 0.049847 | -0.944838 |
| 46 | C | -5.010518 | -0.723601 | -1.710353 |
| 47 | N | -3.613412 | -0.789381 | 0.085687 |
| 48 | C | -5.120279 | -1.968649 | -1.144925 |
| 49 | C | -4.209688 | -2.000779 | 0.017174 |
| 50 | H | -3.023836 | -0.573567 | 0.893545 |
| 51 | O | -3.979027 | -2.925348 | 0.817545 |
| 52 | C | -5.709638 | -0.194671 | -2.916543 |
| 53 | H | -6.399366 | -0.931714 | -3.343874 |
| 54 | H | -6.287505 | 0.709111 | -2.671415 |
| 55 | H | -4.987396 | 0.085498 | -3.698192 |
| 56 | C | -5.955012 | -3.07745 | -1.583858 |
| 57 | H | -6.569689 | -2.880679 | -2.46745 |
| 58 | C | -6.028164 | -4.283972 | -1.008412 |
| 59 | H | -5.434559 | -4.52566 | -0.125924 |
| 60 | H | -6.688514 | -5.052553 | -1.415768 |
| 61 | C | -0.13125 | 4.87822 | -0.22041 |
| 62 | H | -0.698546 | 5.673531 | -0.723465 |
| 63 | H | 0.129283 | 5.266874 | 0.77453 |
| 64 | C | 1.170169 | 4.647324 | -0.996895 |
| 65 | H | 1.046136 | 3.903095 | -1.79534 |
| 66 | H | 1.492592 | 5.577549 | -1.49489 |
| 67 | C | 2.339801 | 4.242361 | -0.138925 |
| 68 | O | 2.428597 | 4.411738 | 1.052628 |
| 69 | O | 3.347137 | 3.747781 | -0.864409 |
| 70 | H | 4.070623 | 3.530427 | -0.252663 |
| 71 | C | -2.46919 | 4.109044 | -2.196835 |
| 72 | H | -2.762149 | 5.131036 | -1.90911 |
| 73 | H | -1.649067 | 4.207178 | -2.925817 |
| 74 | H | -3.322021 | 3.658352 | -2.720598 |
| 75 | C | 1.783335 | -2.054811 | 1.018164 |
| 76 | H | 0.79328 | -1.997977 | 0.527448 |
| 77 | H | 1.624672 | -2.664203 | 1.917394 |
| 78 | C | 4.46559 | -3.298977 | -1.620367 |
| 79 | H | 3.835338 | -3.933024 | -2.266424 |

**Reference**

1. Zunszain PA, Ghuman J, McDonagh AF, Curry S. Crystallographic analysis of human serum albumin complexed with 4Z, 15E-bilirubin-IXα. *Journal of molecular biology* 2008, **381**(2)**:** 394-406.

2. Eberhardt J, Santos-Martins D, Tillack AF, Forli S. AutoDock Vina 1.2. 0: new docking methods, expanded force field, and python bindings. *Journal of chemical information and modeling* 2021, **61**(8)**:** 3891-3898.

3. Trott O, Olson AJ. AutoDock Vina: improving the speed and accuracy of docking with a new scoring function, efficient optimization, and multithreading. *Journal of computational chemistry* 2010, **31**(2)**:** 455-461.

4. Isom DG, Castañeda CA, Cannon BR, Velu PD, García-Moreno E B. Charges in the hydrophobic interior of proteins. *Proceedings of the National Academy of Sciences* 2010, **107**(37)**:** 16096-16100.

5. Díaz N, Suárez D, Sordo TL, Merz KM. Molecular dynamics study of the IIA binding site in human serum albumin: influence of the protonation state of Lys195 and Lys199. *Journal of medicinal chemistry* 2001, **44**(2)**:** 250-260.

6. Lu T. Sobtop, Version 1.0(Dev3.2). <Http://Sobereva.Com/Soft/Sobtop>. 13 Jun 2024.

7. GAFF and GAFF2 are public domain force fields and are part of the AmberTools16 distribution, available for download at <http://amber.org> (accessed October 2018).

8. Bayly CI, Cieplak P, Cornell W, Kollman PA. A well-behaved electrostatic potential based method using charge restraints for deriving atomic charges: the RESP model. *The Journal of Physical Chemistry* 1993, **97**(40)**:** 10269-10280.

9. Walker M, Harvey AJ, Sen A, Dessent CE. Performance of M06, M06-2X, and M06-HF density functionals for conformationally flexible anionic clusters: M06 functionals perform better than B3LYP for a model system with dispersion and ionic hydrogen-bonding interactions. *The Journal of Physical Chemistry A* 2013, **117**(47)**:** 12590-12600.

10. Weigend F, Ahlrichs R. Balanced basis sets of split valence, triple zeta valence and quadruple zeta valence quality for H to Rn: Design and assessment of accuracy. *Physical Chemistry Chemical Physics* 2005, **7**(18)**:** 3297-3305.

11. Frisch M J TGW, Schlegel H B, et al. *Gaussian 09, Gaussian, Inc, Wallingford, CT, 2013*.

12. Maier JA, Martinez C, Kasavajhala K, Wickstrom L, Hauser KE, Simmerling C. ff14SB: improving the accuracy of protein side chain and backbone parameters from ff99SB. *Journal of chemical theory and computation* 2015, **11**(8)**:** 3696-3713.

13. Abraham MJ, Murtola T, Schulz R, Páll S, Smith JC, Hess B*, et al.* GROMACS: High performance molecular simulations through multi-level parallelism from laptops to supercomputers. *SoftwareX* 2015, **1:** 19-25.

14. Jorgensen WL, Chandrasekhar J, Madura JD, Impey RW, Klein ML. Comparison of simple potential functions for simulating liquid water. *The Journal of chemical physics* 1983, **79**(2)**:** 926-935.

15. Humphrey W, Dalke A, Schulten K. VMD: visual molecular dynamics. *Journal of molecular graphics* 1996, **14**(1)**:** 33-38.

16. Schrodinger L. The PyMOL molecular graphics system. *Version* 2015, **1:** 8.

17. Sheng X, Himo F. The quantum chemical cluster approach in biocatalysis. *Accounts of Chemical Research* 2023, **56**(8)**:** 938-947.

18. Siegbahn PE, Himo F. The quantum chemical cluster approach for modeling enzyme reactions. *Wiley Interdisciplinary Reviews: Computational Molecular Science* 2011, **1**(3)**:** 323-336.

19. Frisch Me, Trucks G, Schlegel HB, Scuseria G, Robb M, Cheeseman J*, et al.* Gaussian 16. Gaussian, inc. Wallingford, CT; 2016.

20. Adamo C, Barone V. Toward reliable density functional methods without adjustable parameters: The PBE0 model. *The Journal of chemical physics* 1999, **110**(13)**:** 6158-6170.

21. Grimme S, Antony J, Ehrlich S, Krieg H. A consistent and accurate ab initio parametrization of density functional dispersion correction (DFT-D) for the 94 elements H-Pu. *The Journal of chemical physics* 2010, **132**(15).

22. Marenich AV, Cramer CJ, Truhlar DG. Universal solvation model based on solute electron density and on a continuum model of the solvent defined by the bulk dielectric constant and atomic surface tensions. *The Journal of Physical Chemistry B* 2009, **113**(18)**:** 6378-6396.

23. Yanai T, Tew DP, Handy NC. A new hybrid exchange–correlation functional using the Coulomb-attenuating method (CAM-B3LYP). *Chemical physics letters* 2004, **393**(1-3)**:** 51-57.

24. Lu T, Chen F. Multiwfn: A multifunctional wavefunction analyzer. *Journal of computational chemistry* 2012, **33**(5)**:** 580-592.
